# Supplementary figures and images for: SENP3-mediated deSUMOylation of dynamin-related protein 1 promotes cell death following ischaemia
Source: PubMed Central journal article supplement — EMBO J. 2013 Mar 22;32(11):1514–28. doi: 10.1038/emboj.2013.65 (PMC3671254; doi:10.1038/emboj.2013.65), 2013-03-22

Figure 1

A

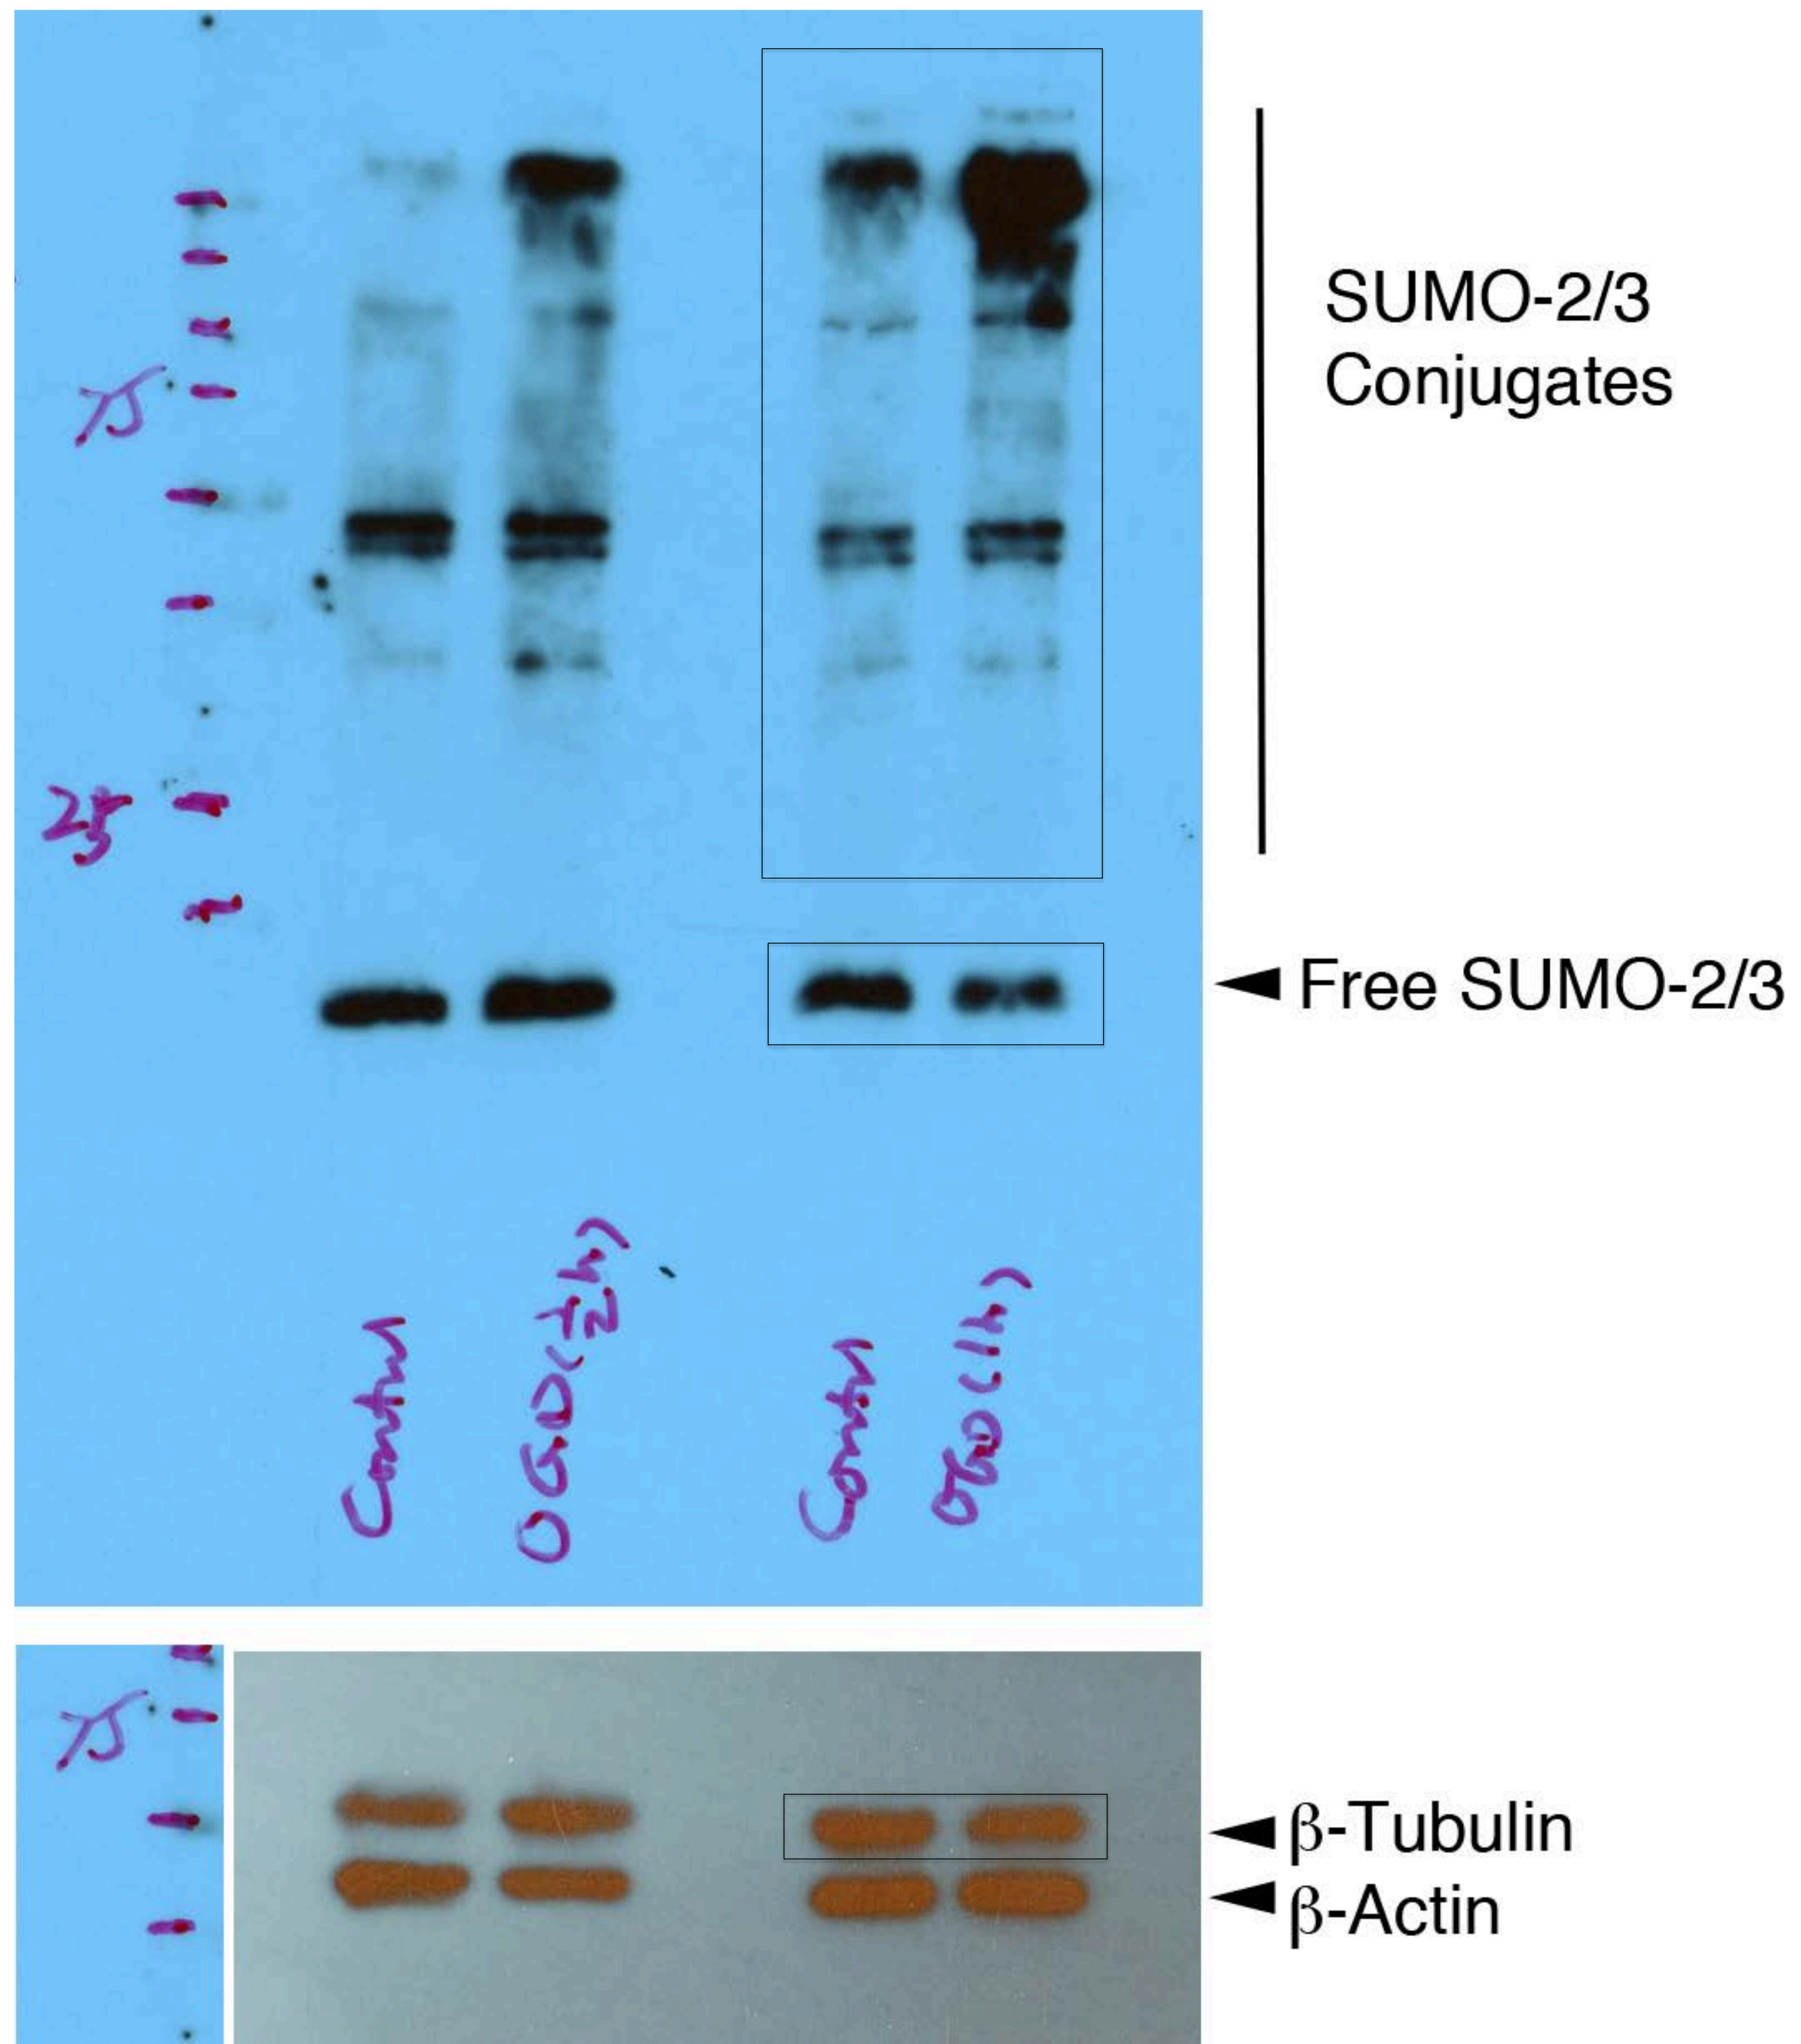

C

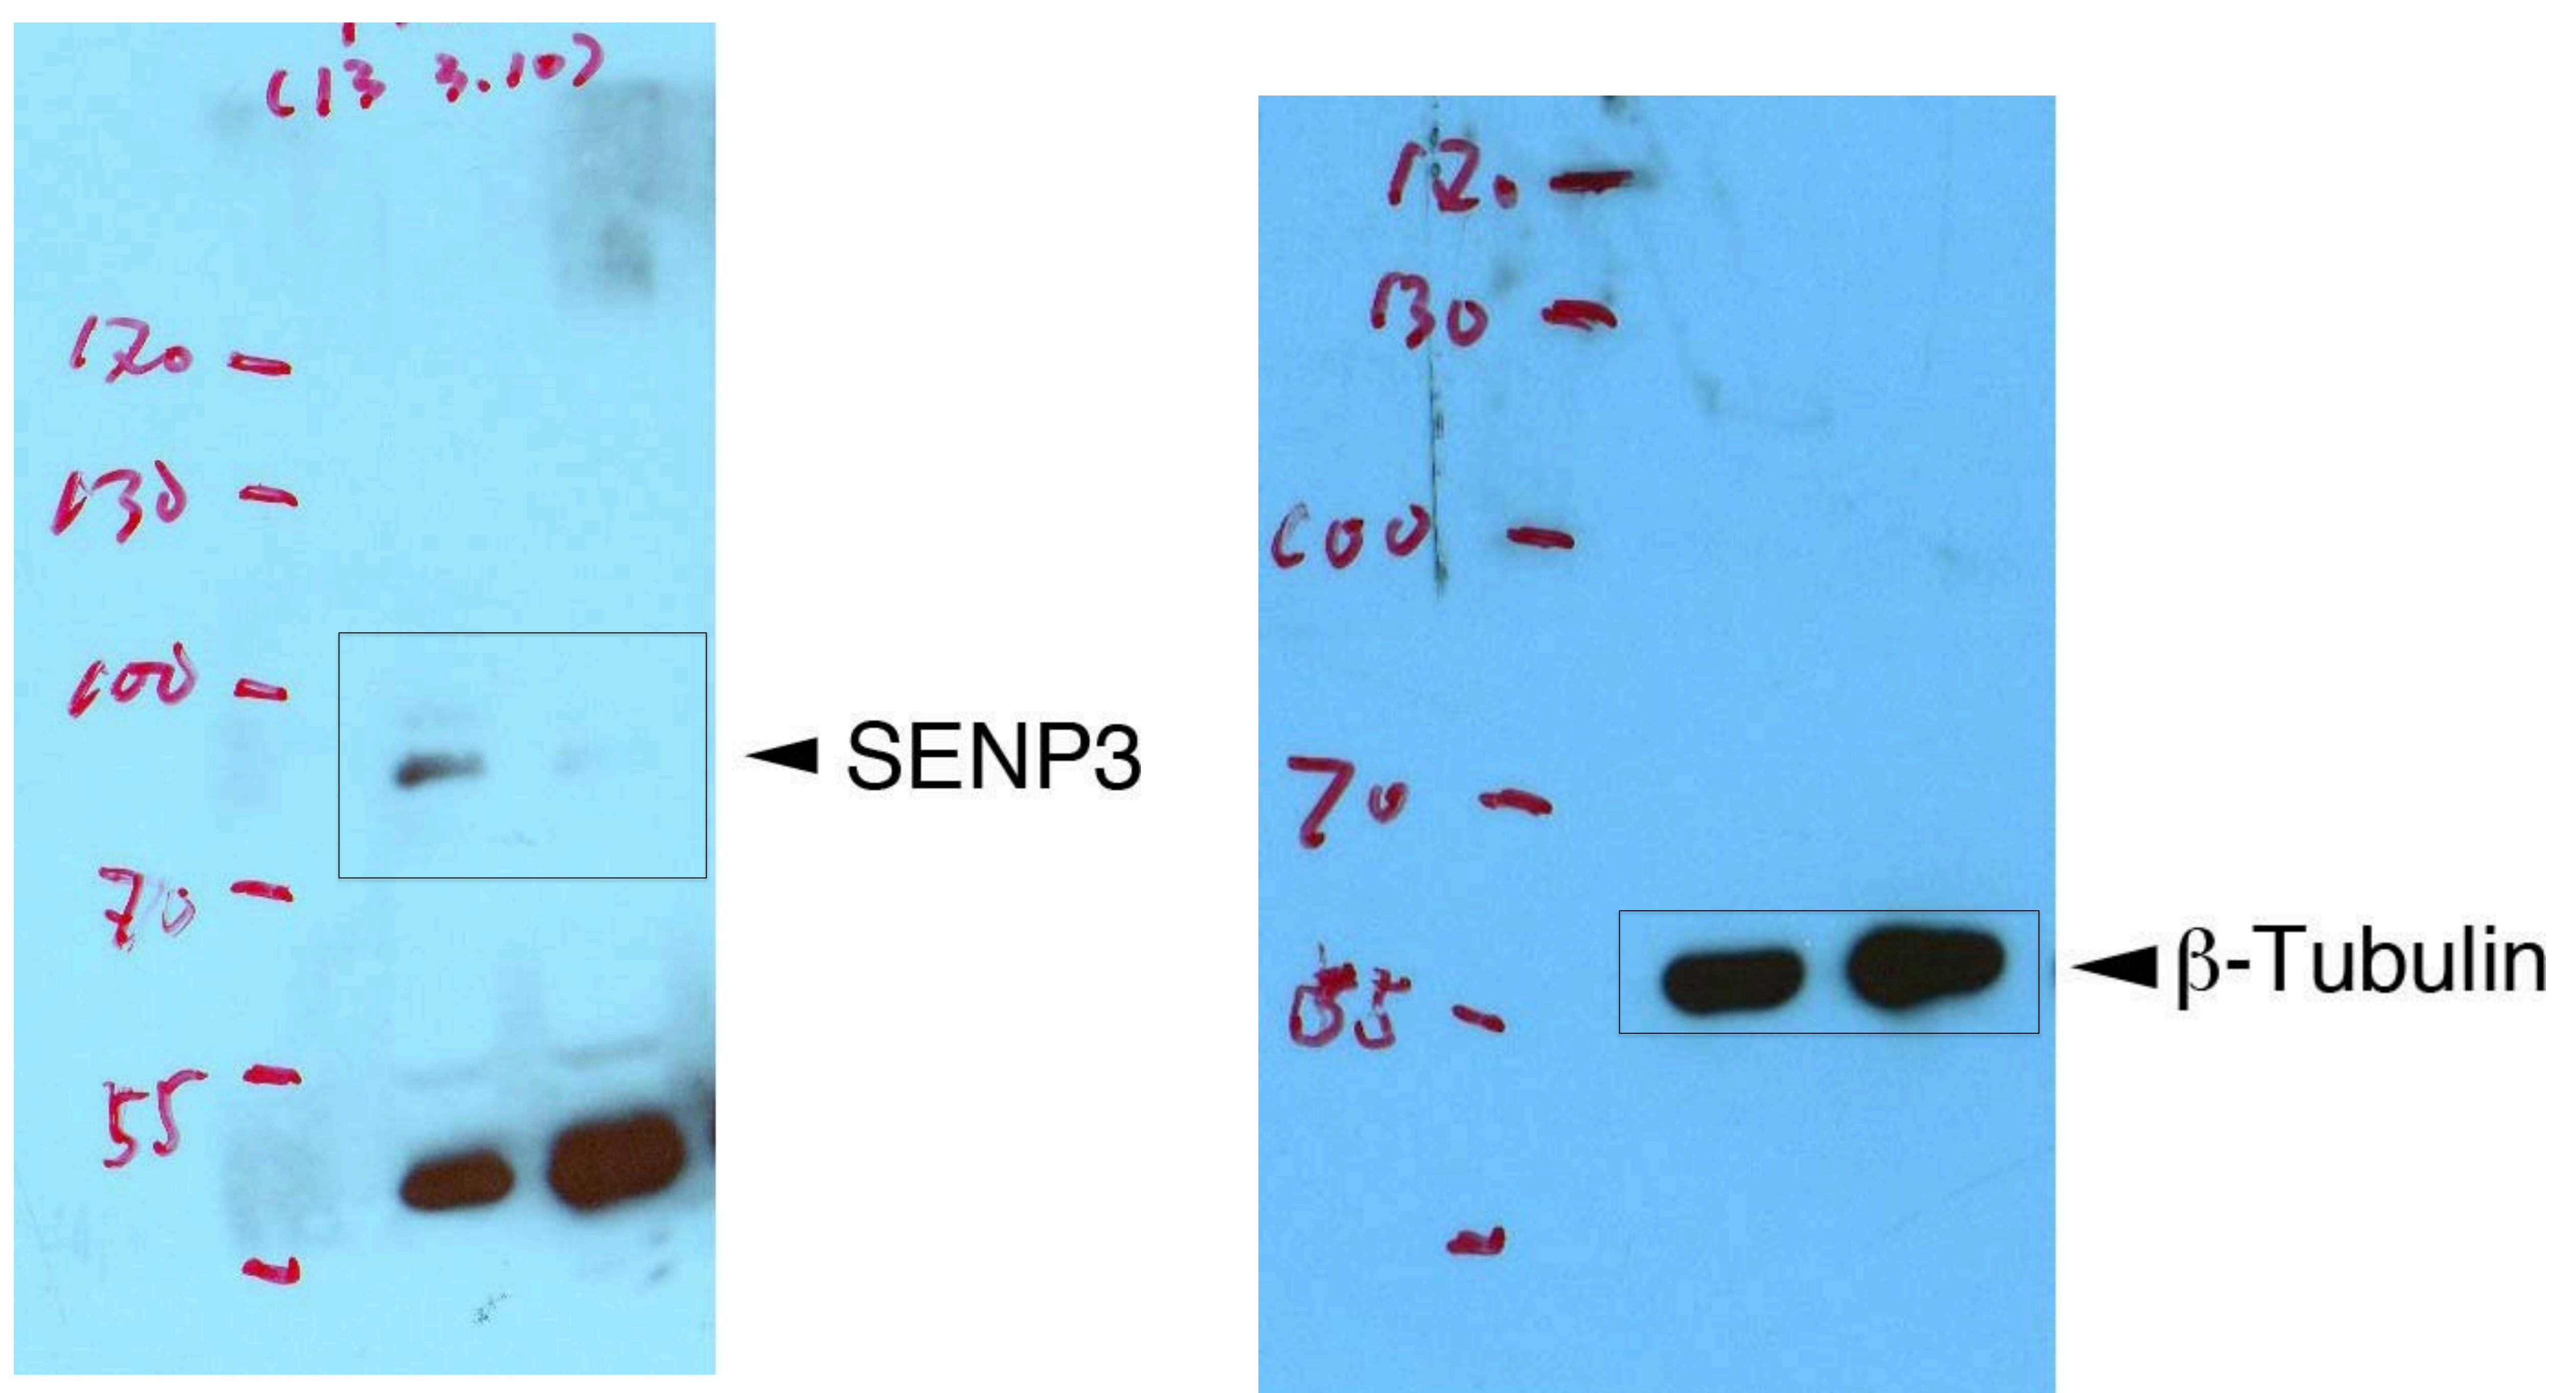

Supplement: emboj201365df1.pdf [file emboj201365df1.pdf]

**Figure 2**

**A**

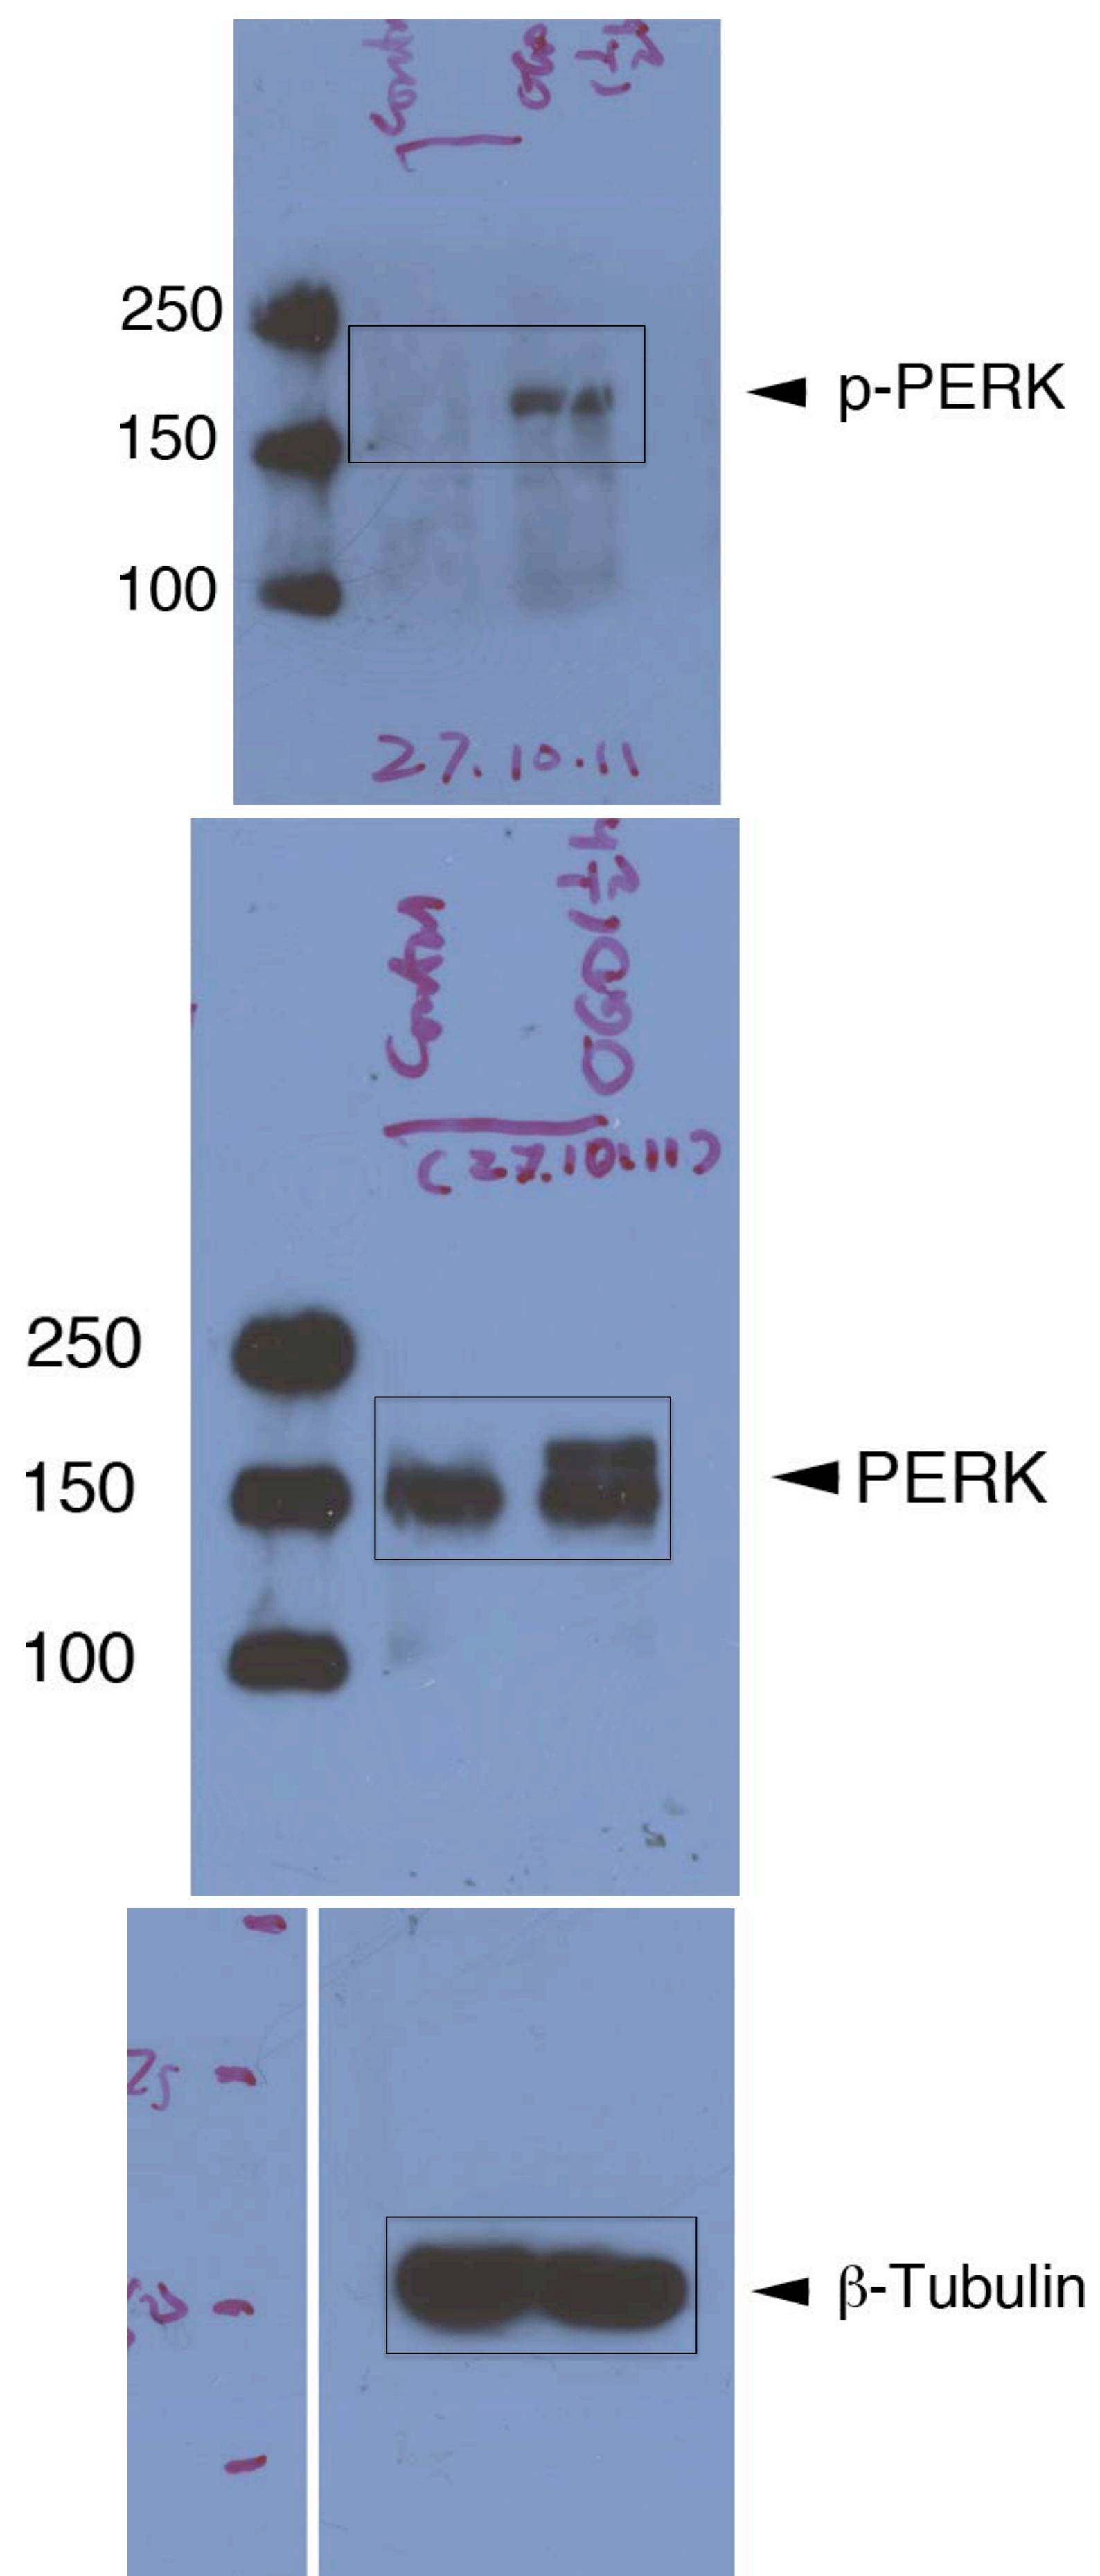

**C**

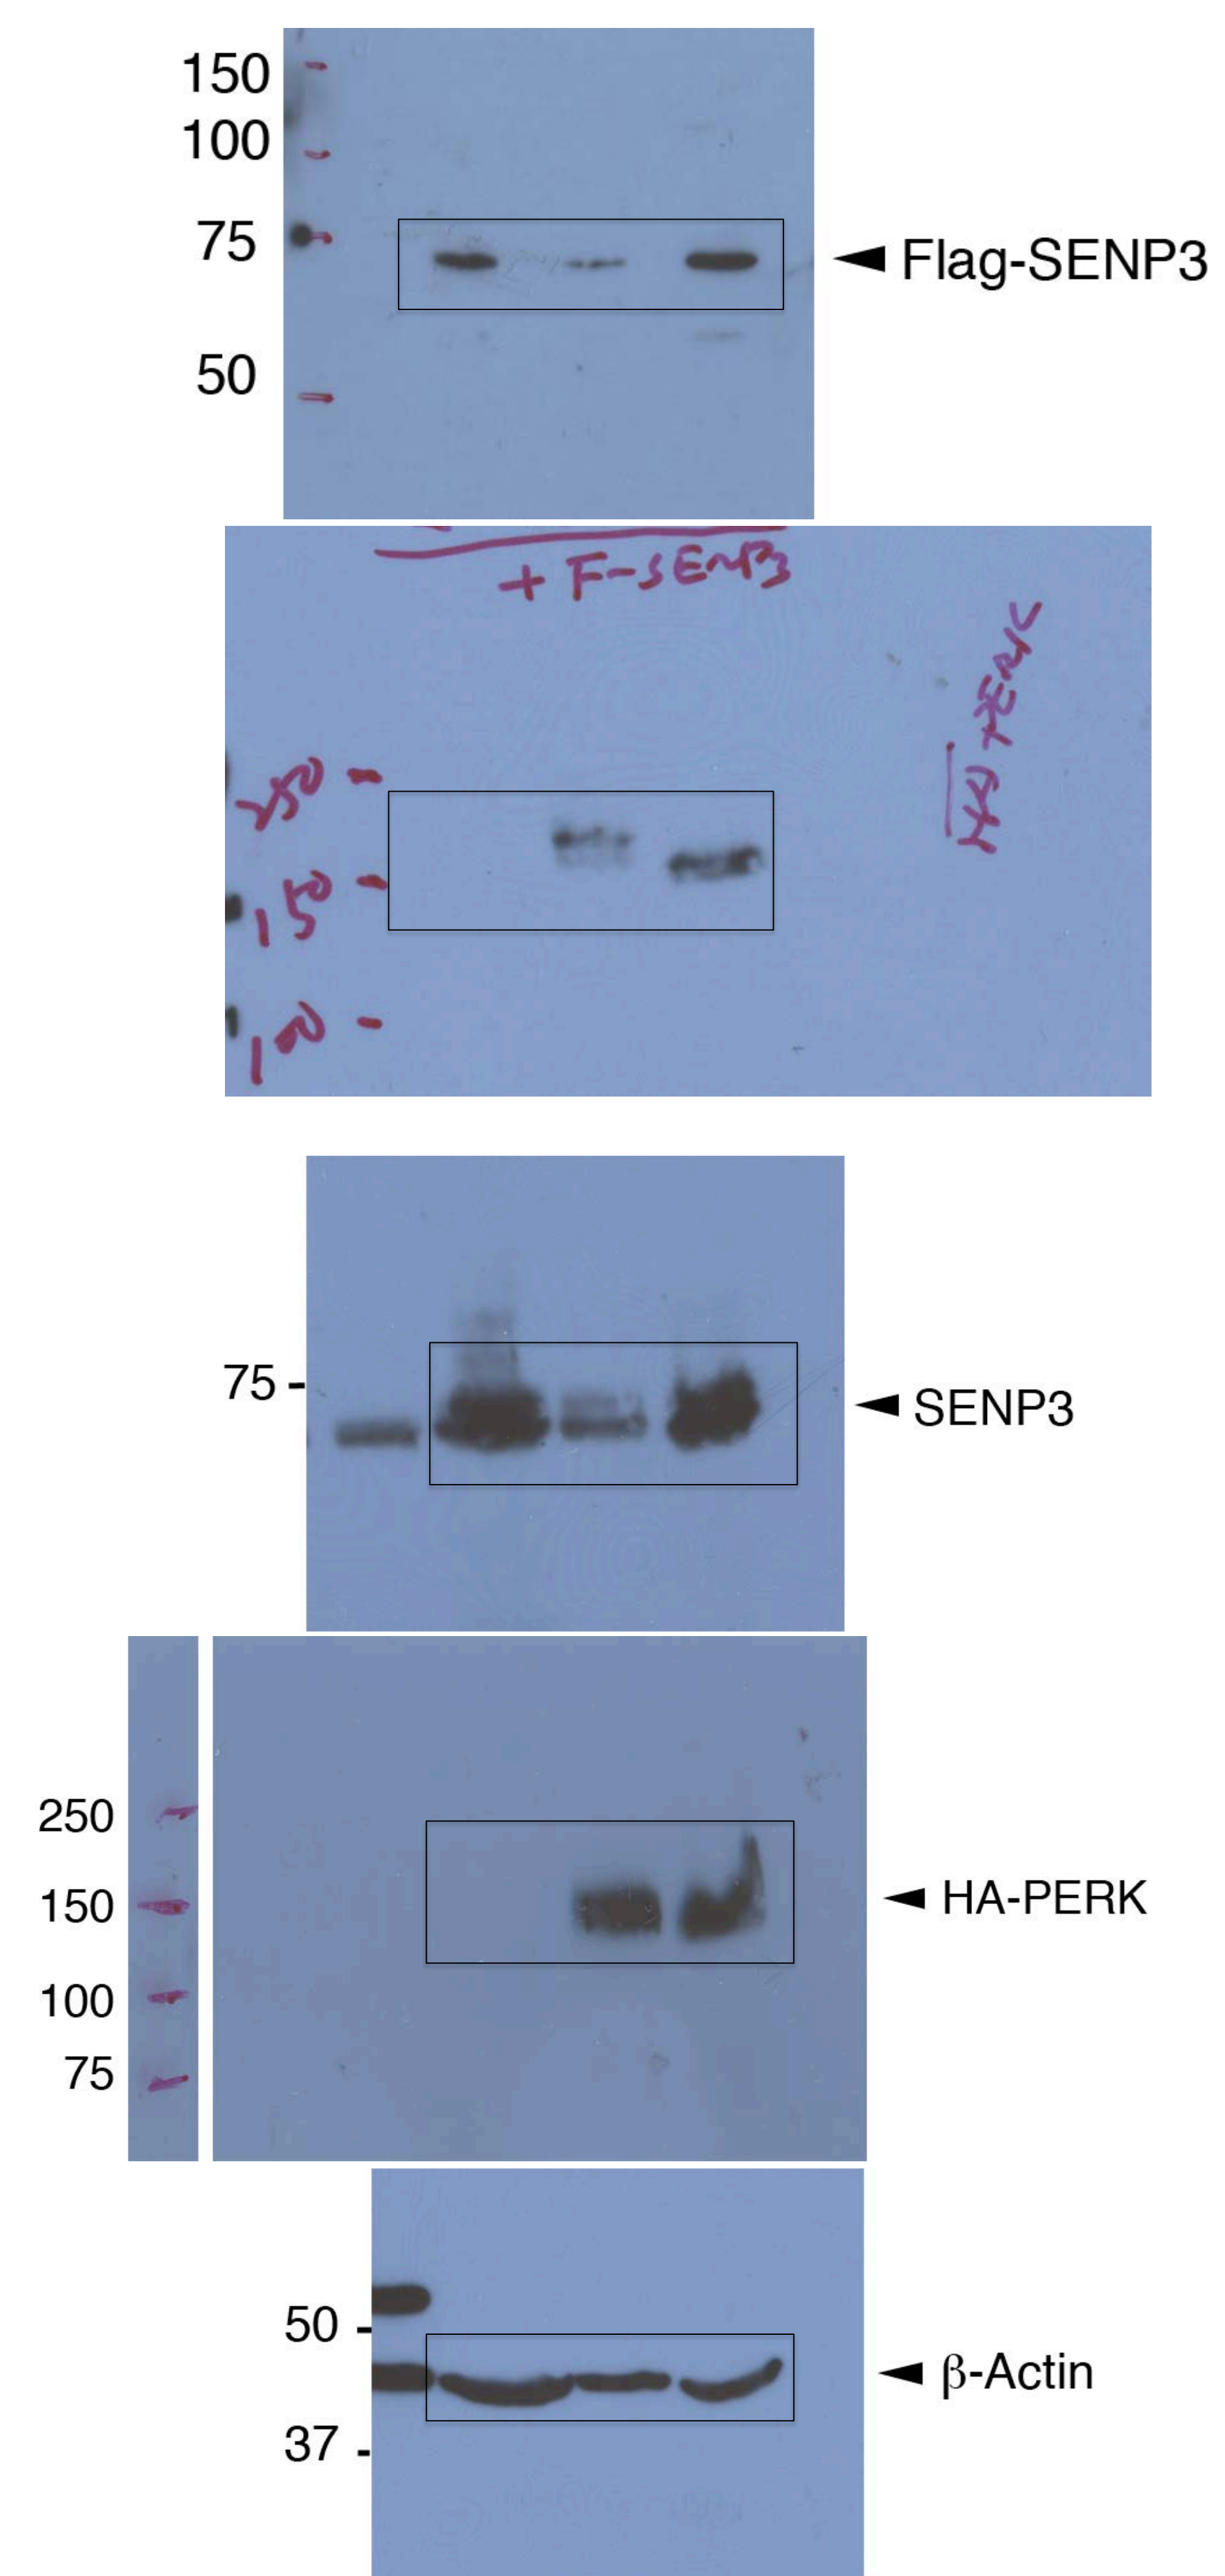

**D**

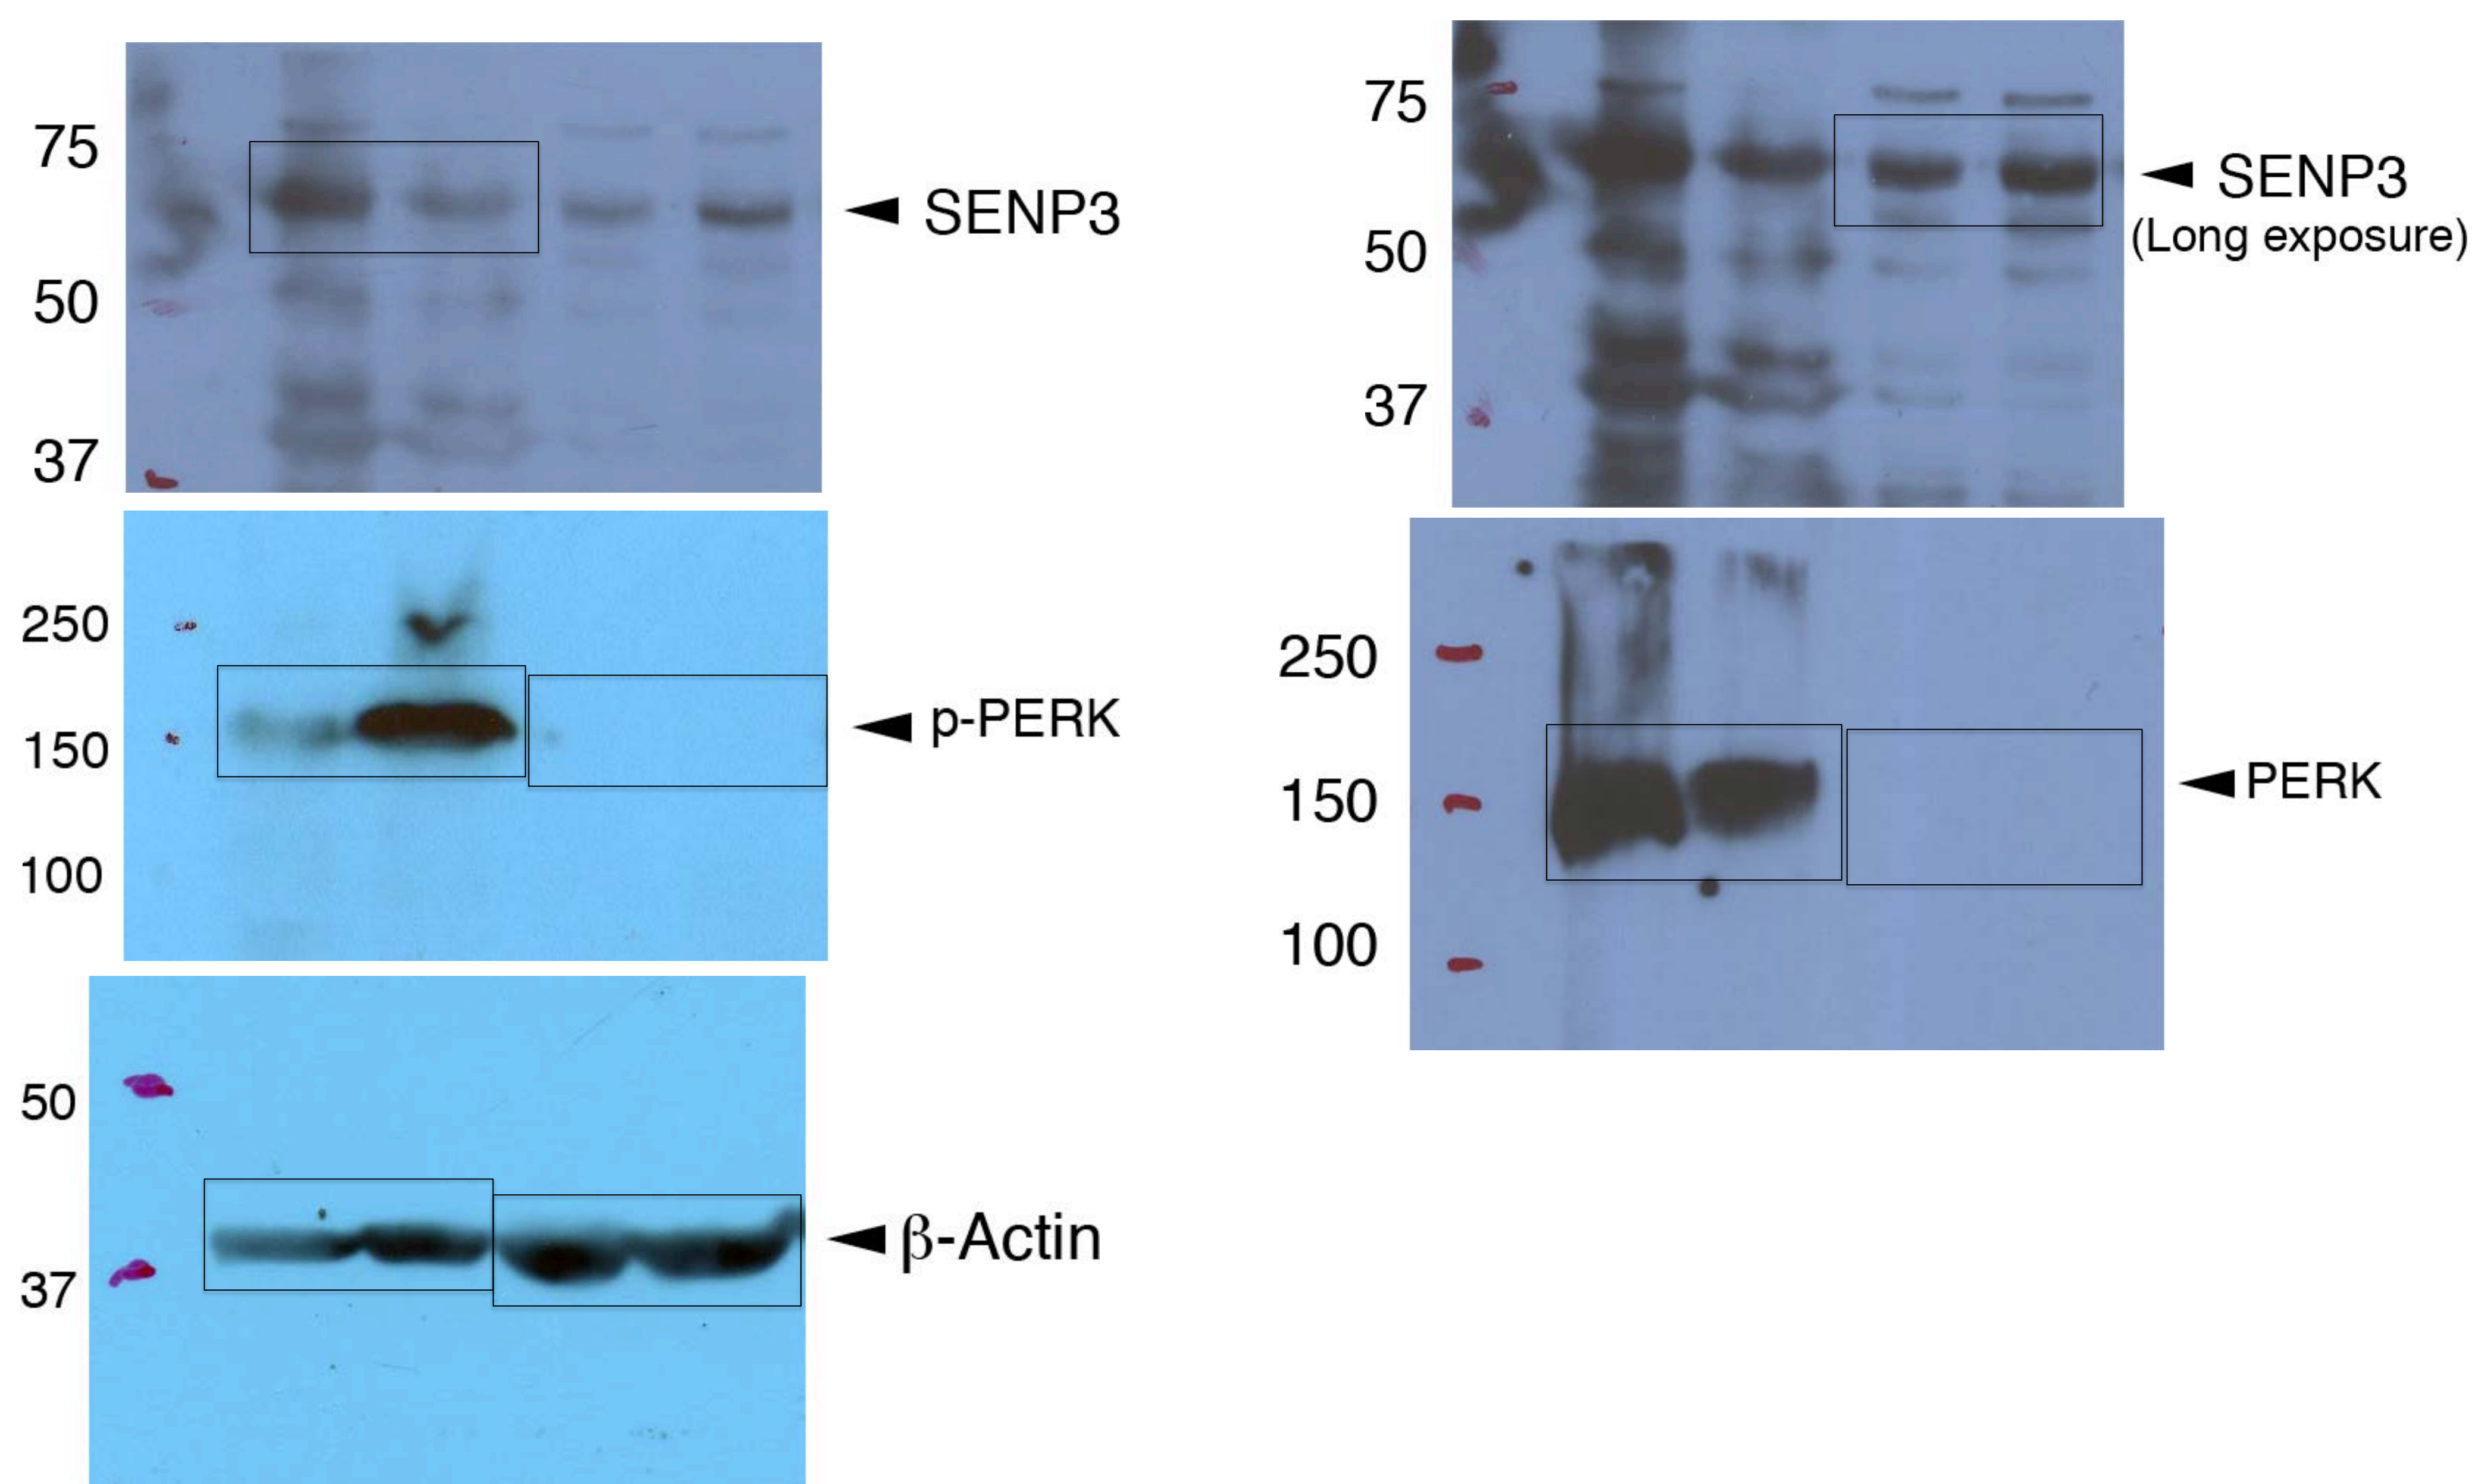

Supplement: emboj201365df2.pdf [file emboj201365df2.pdf]

**Figure 3**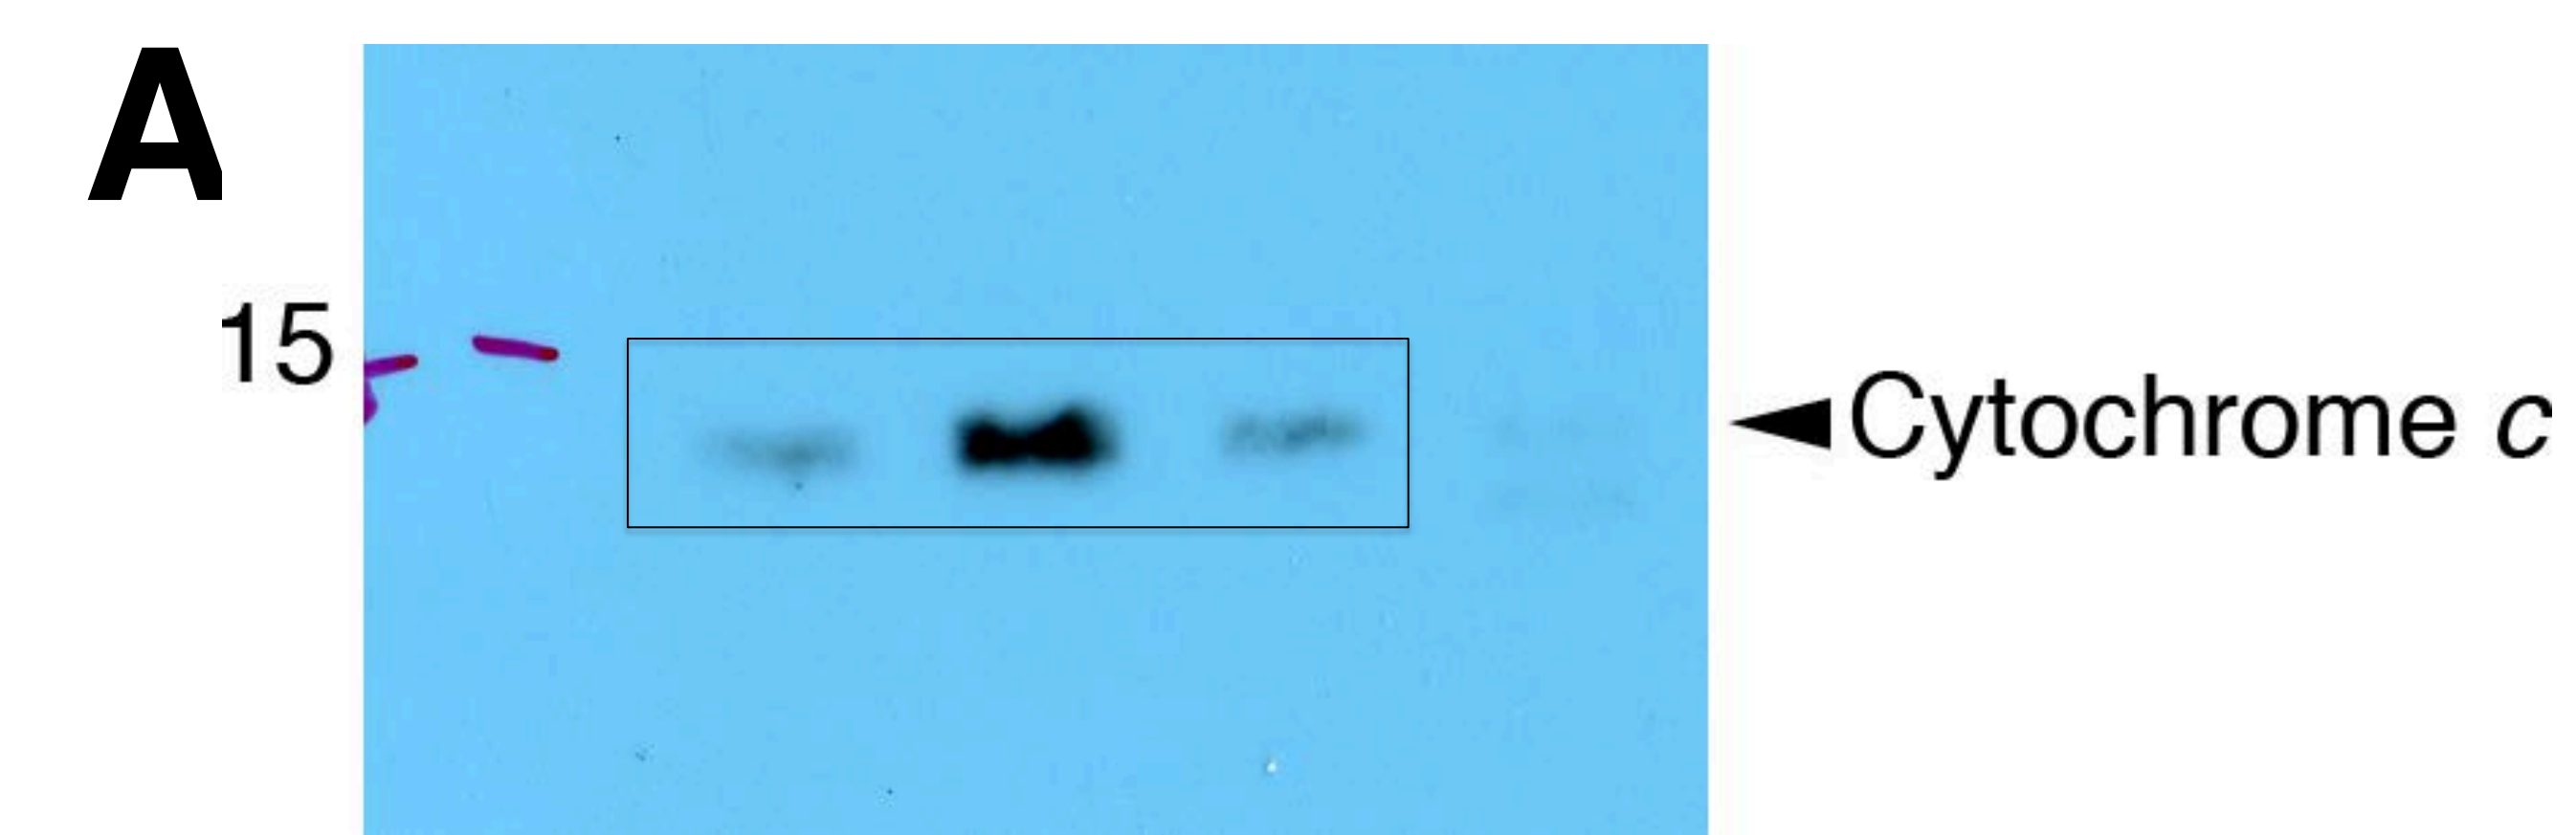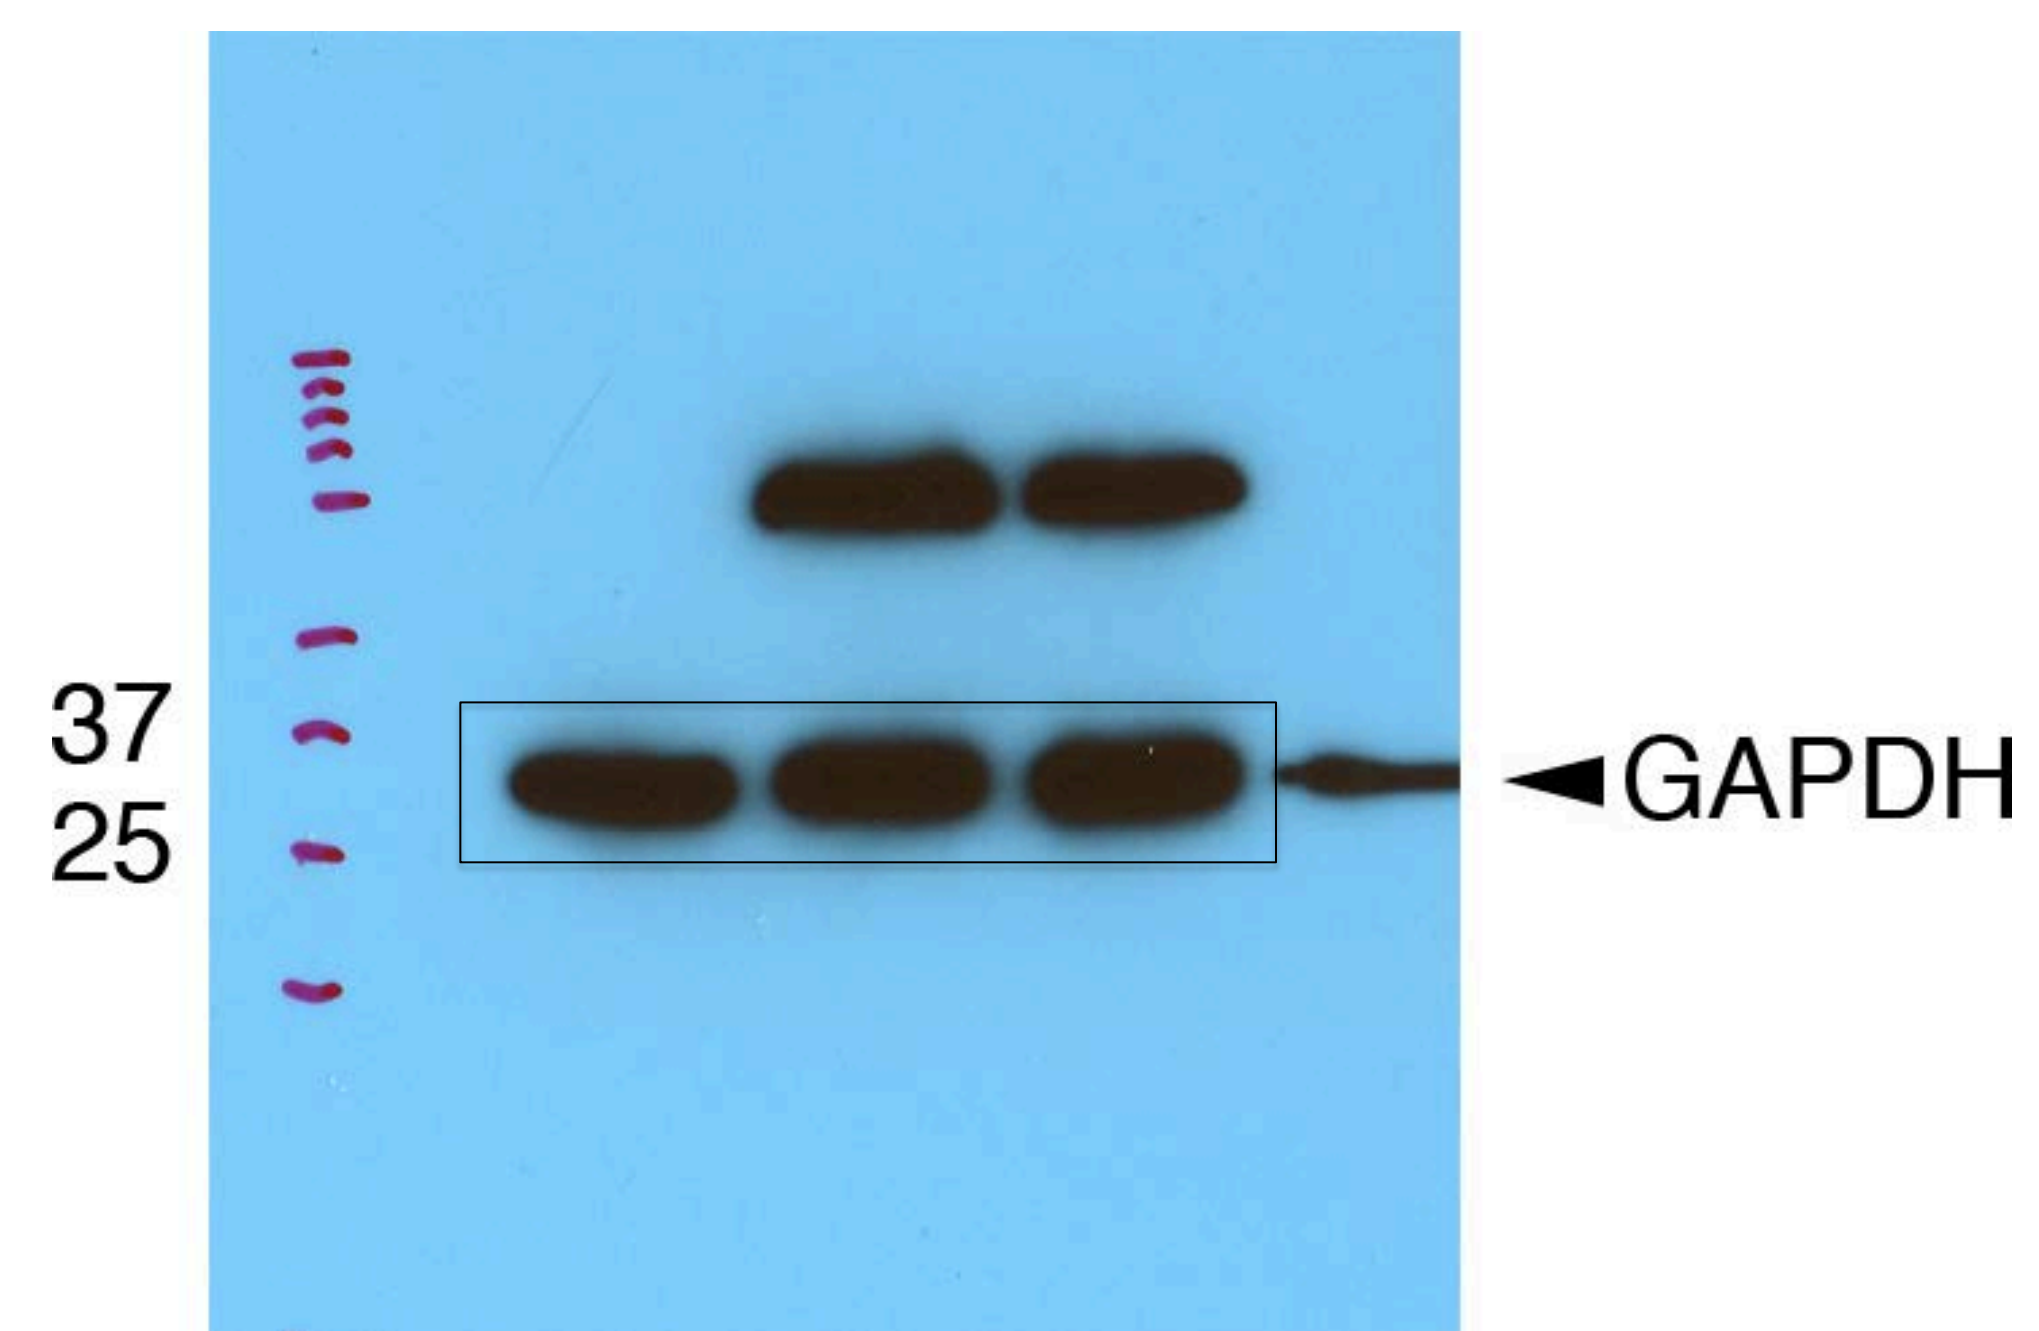**C**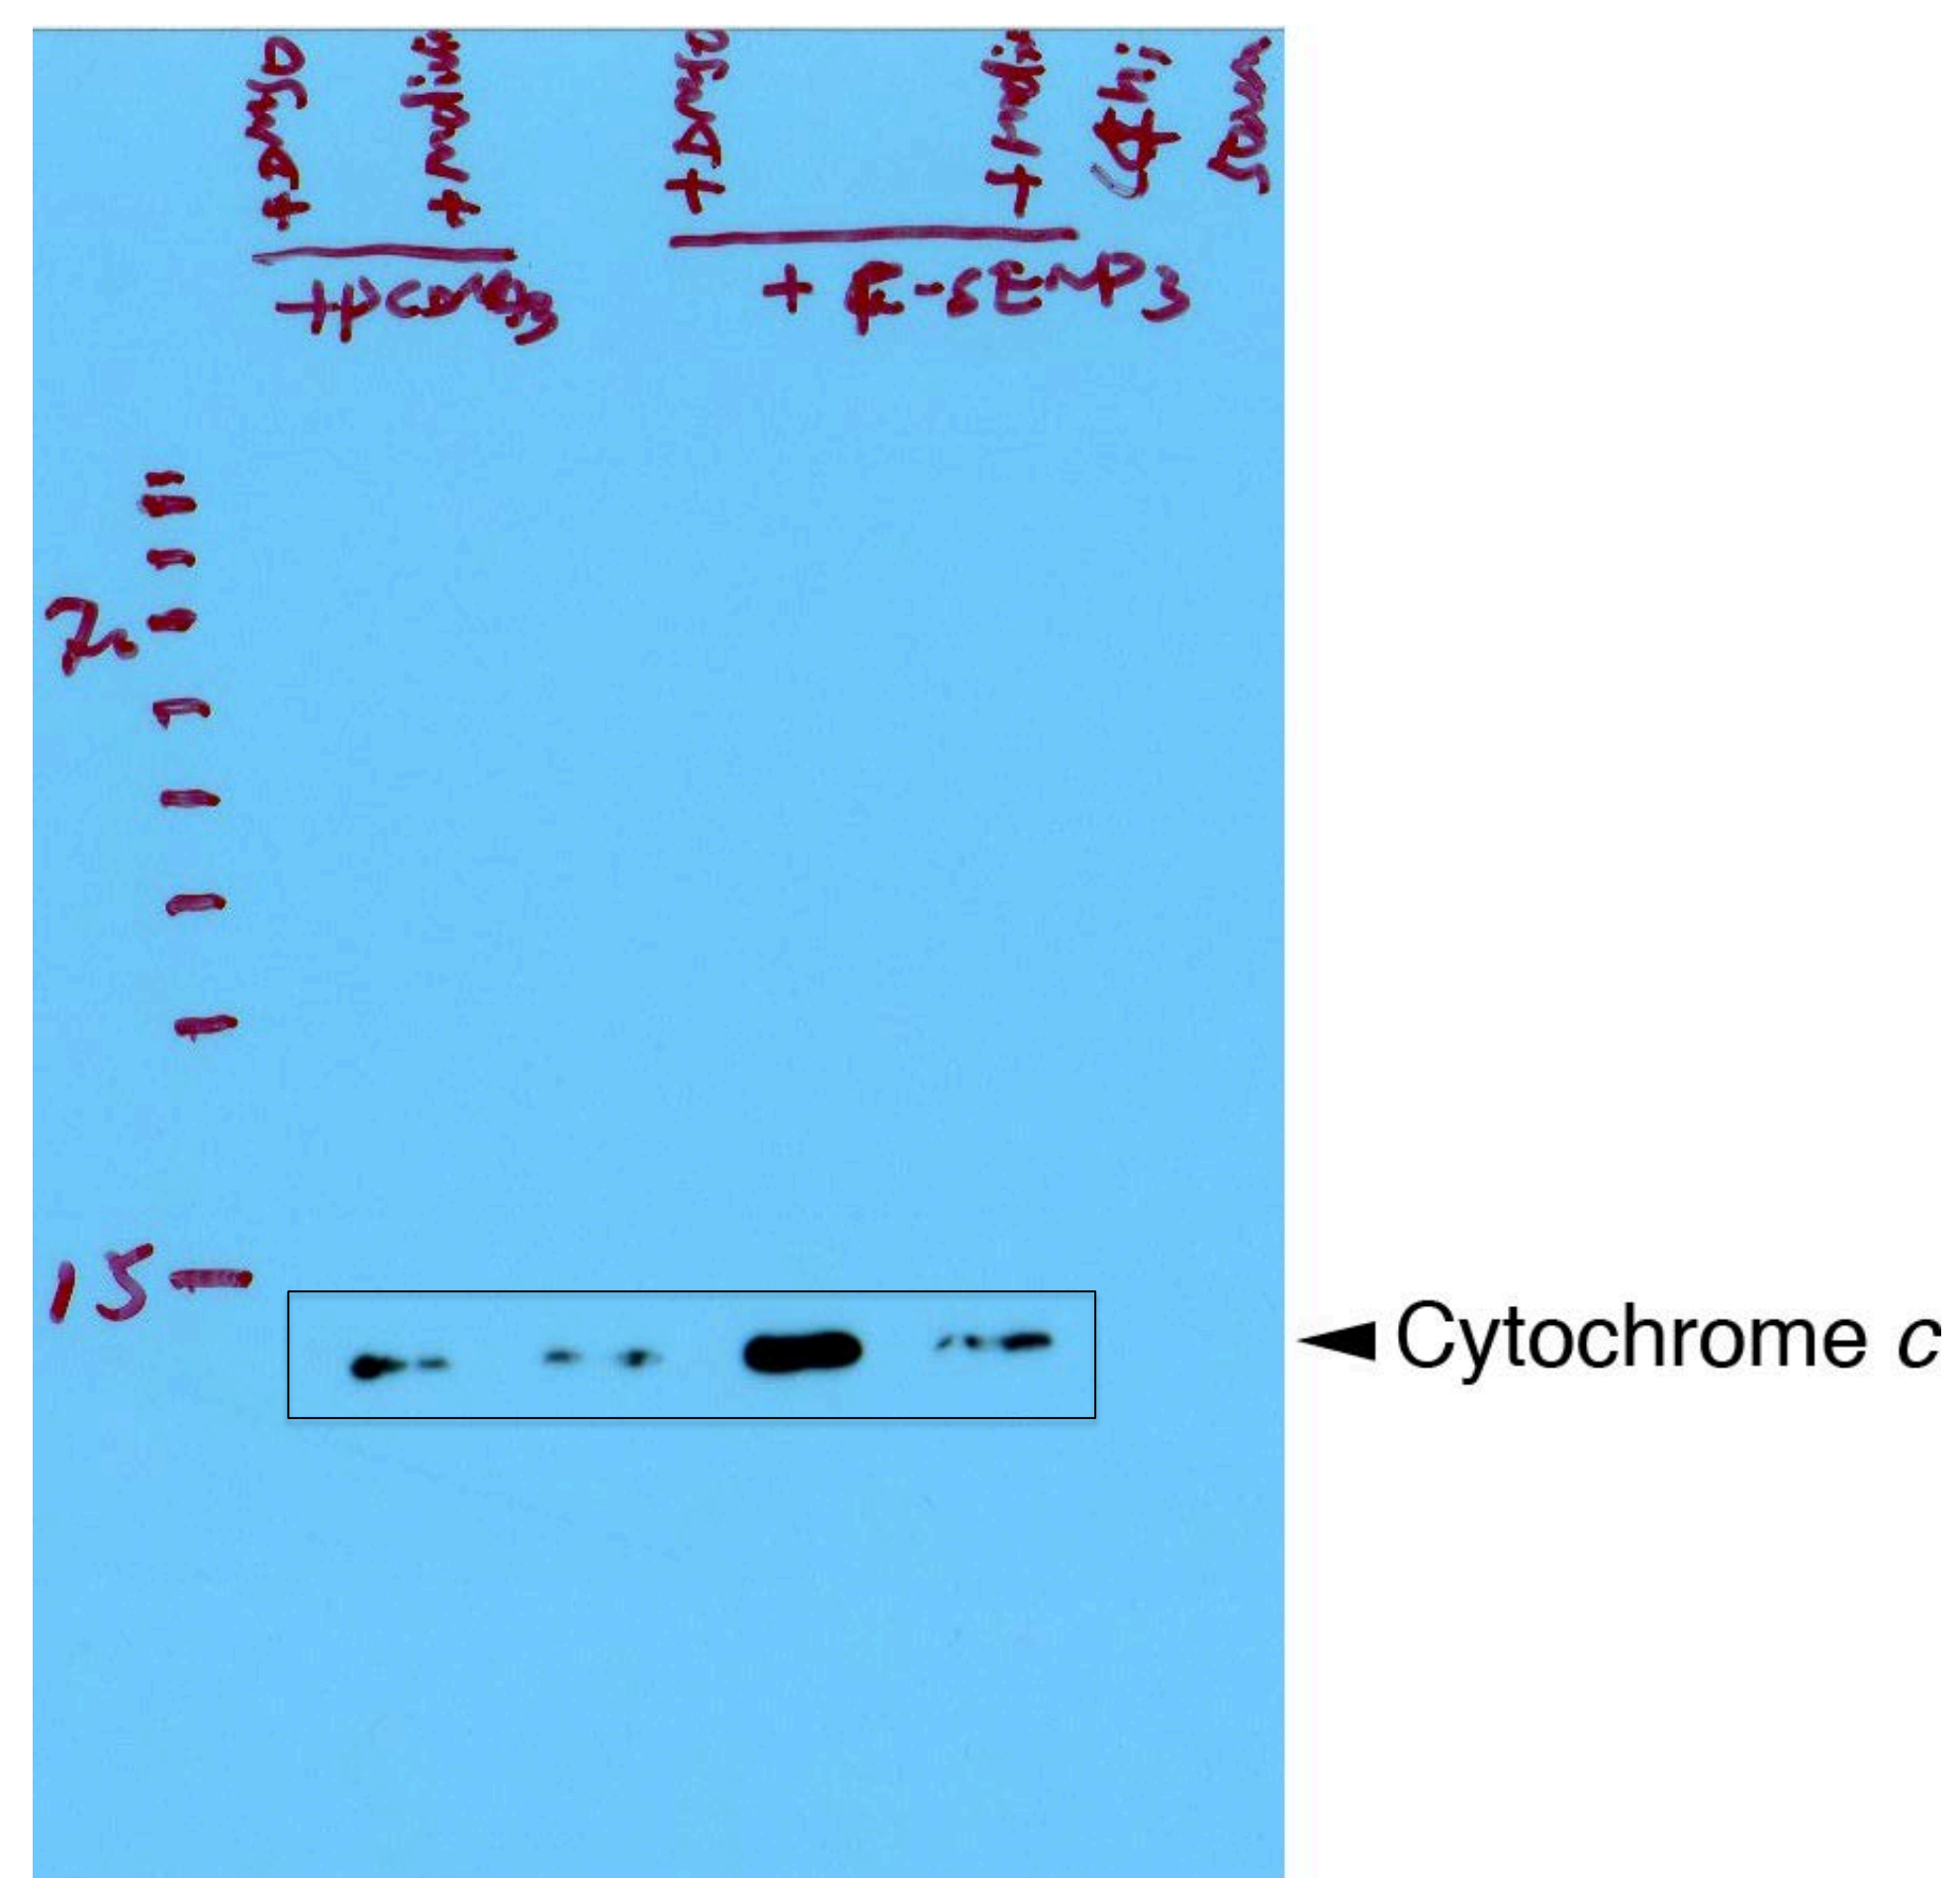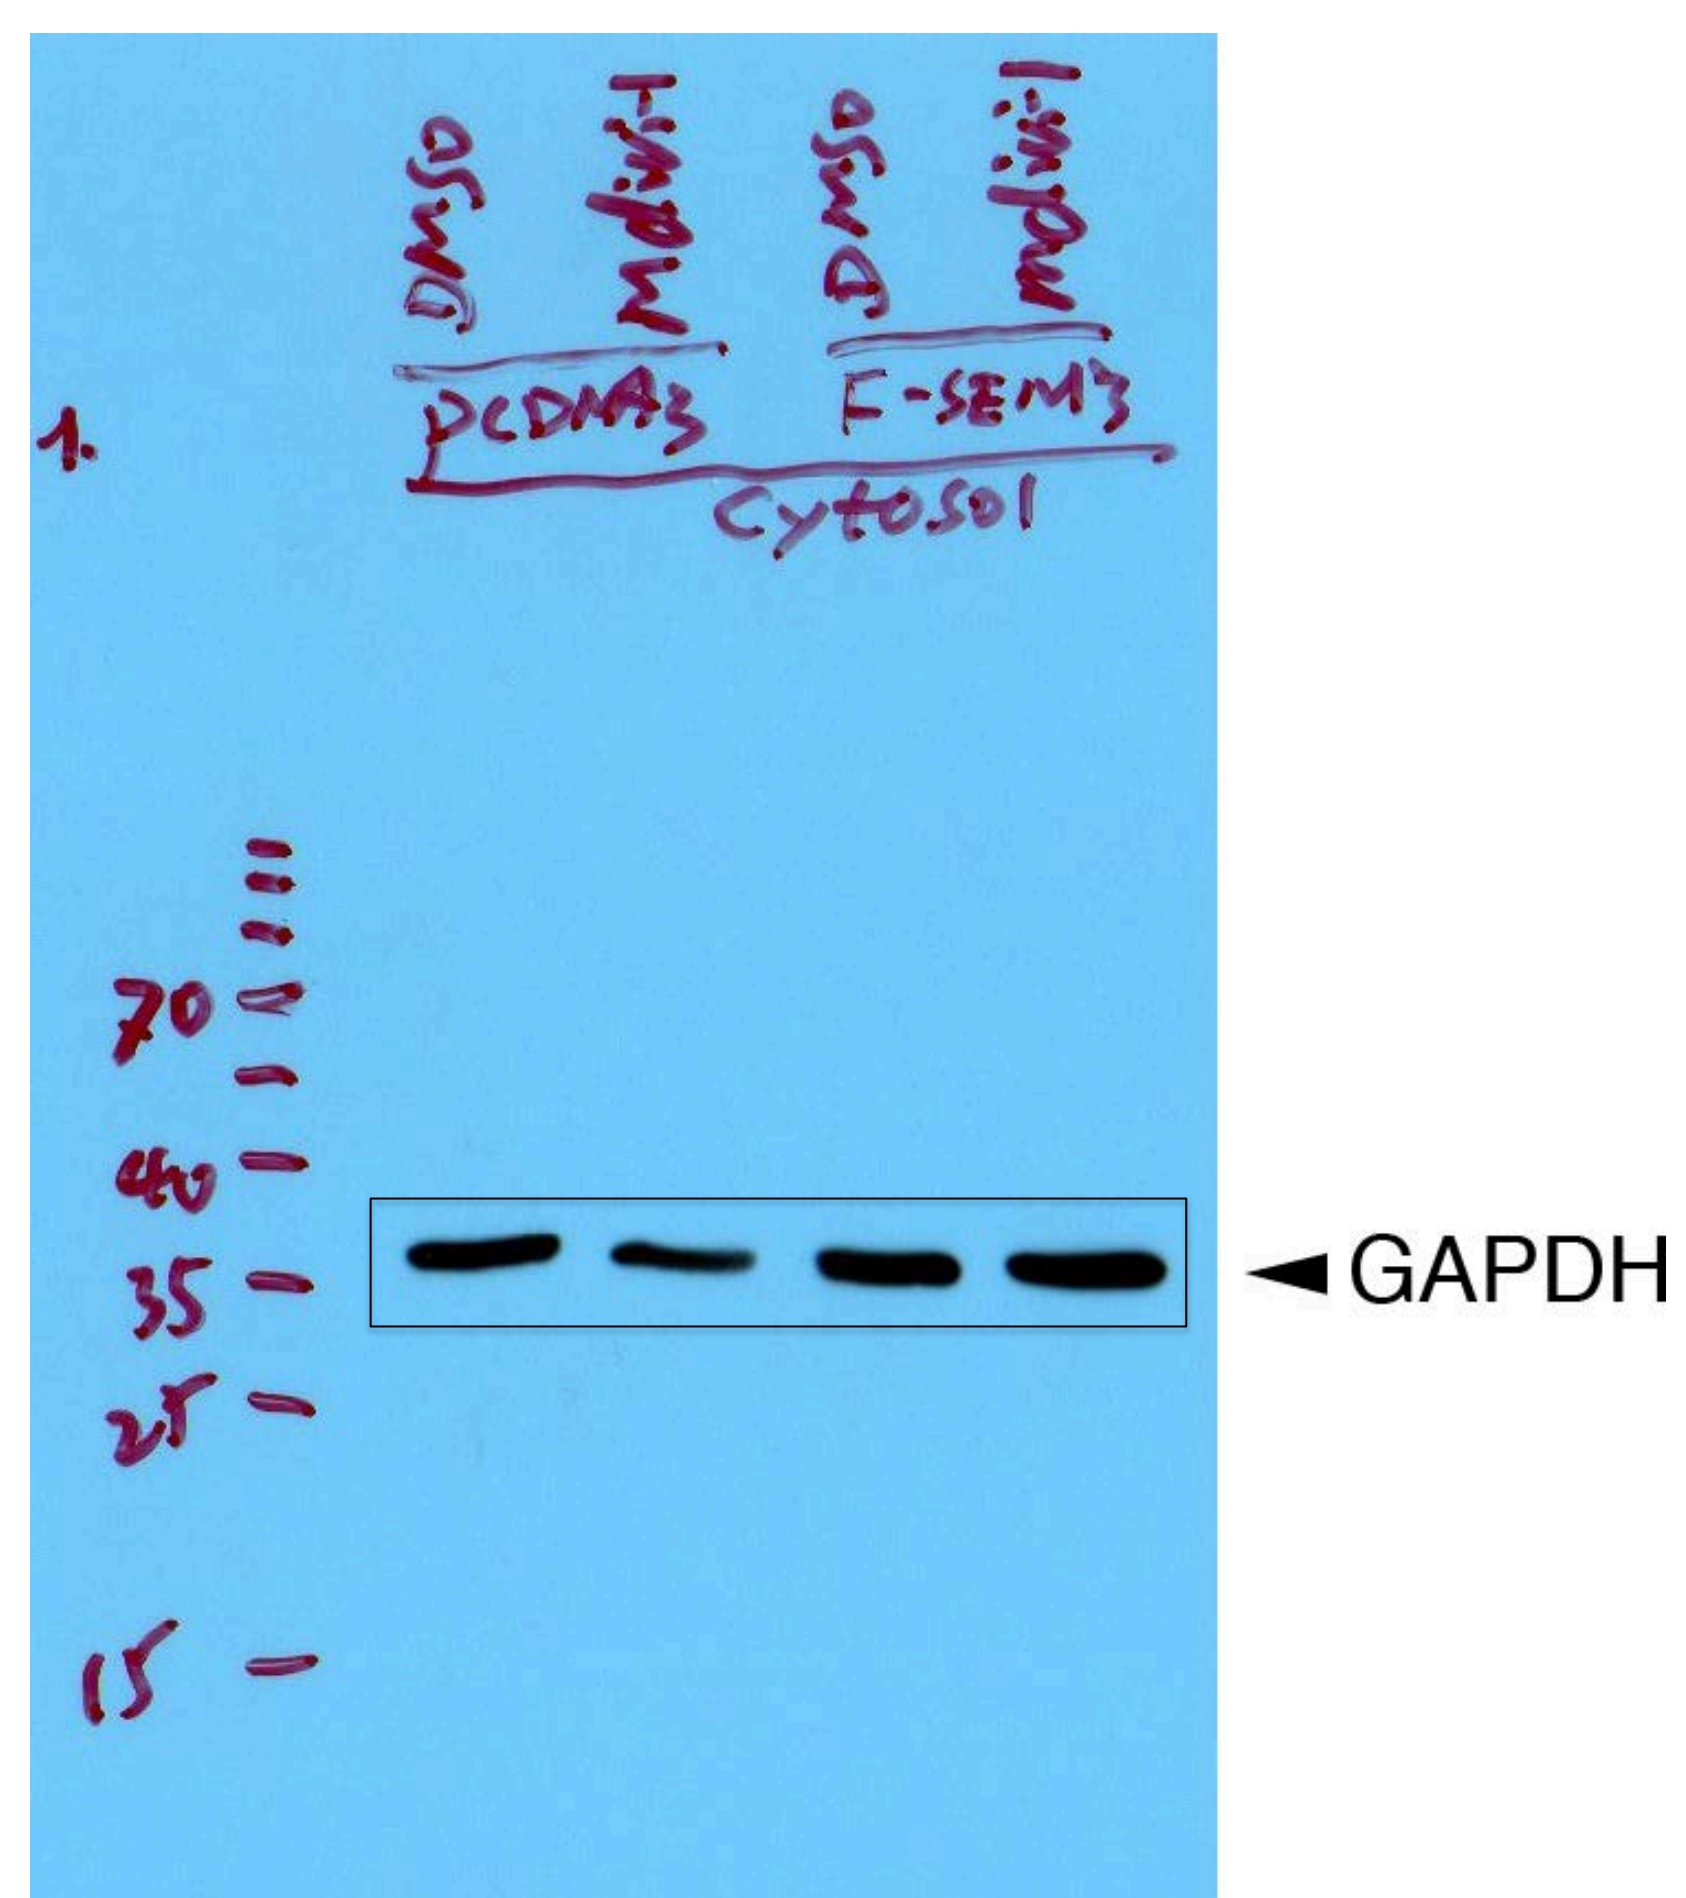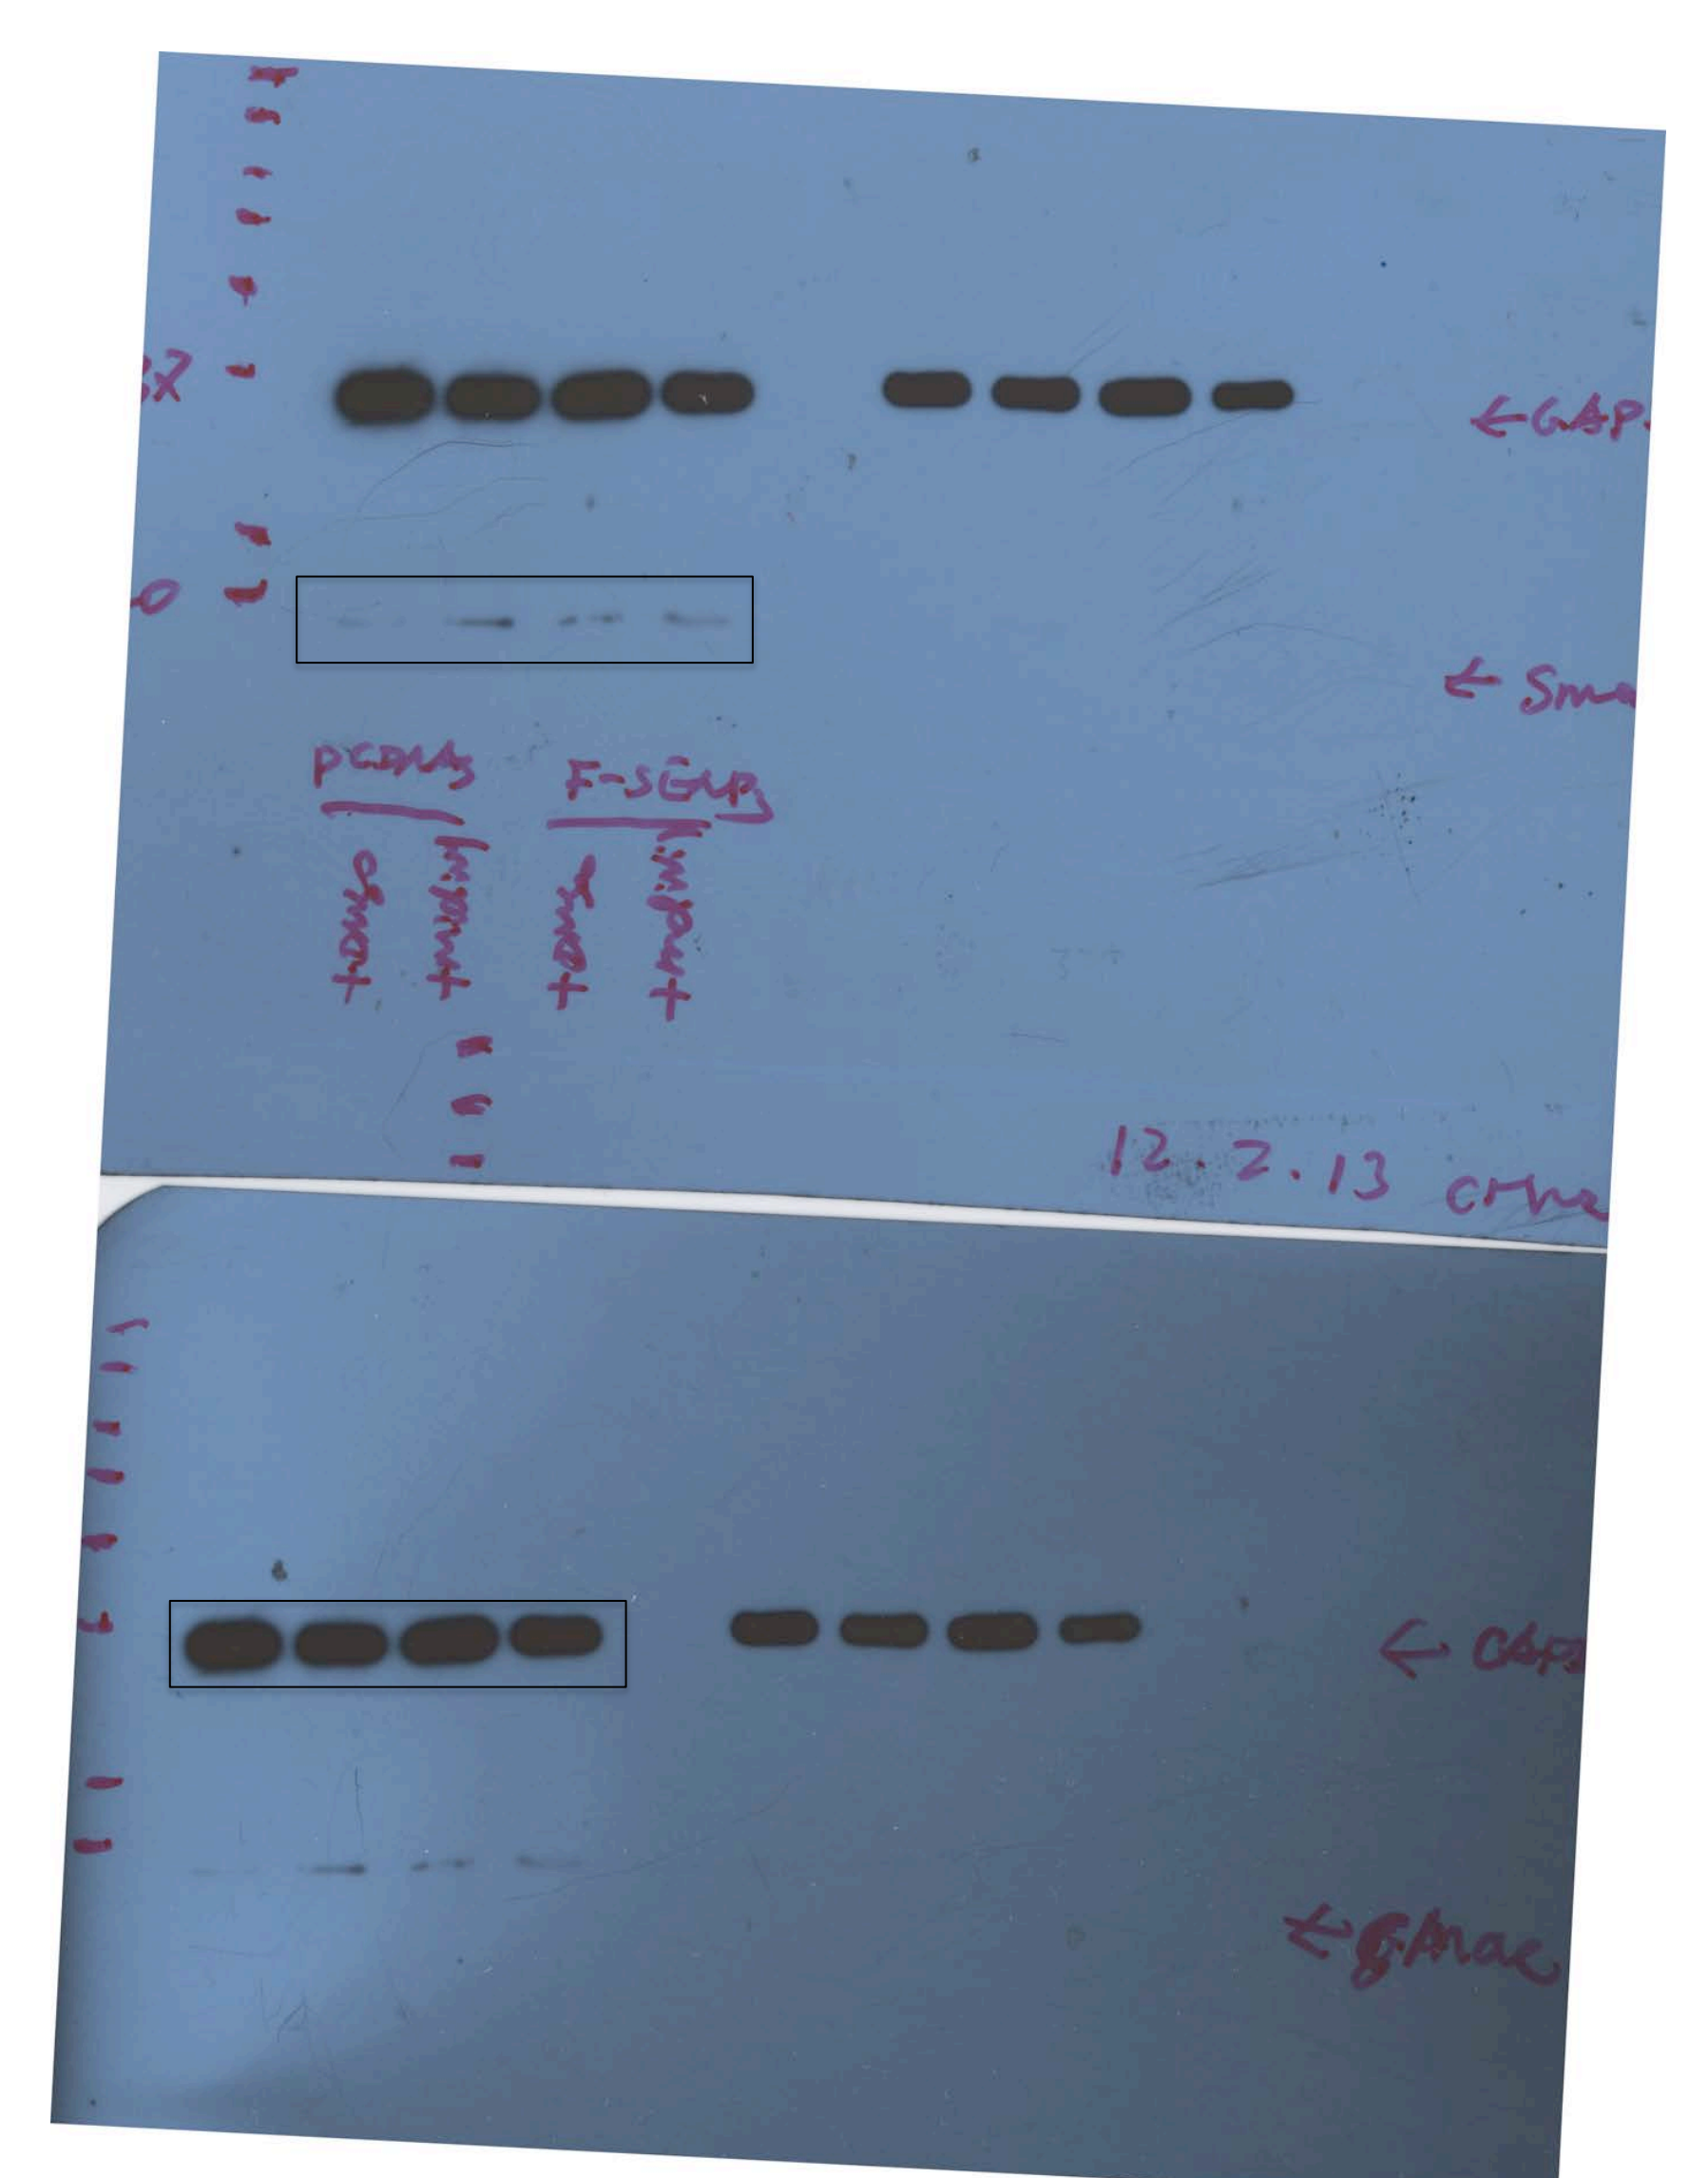**F**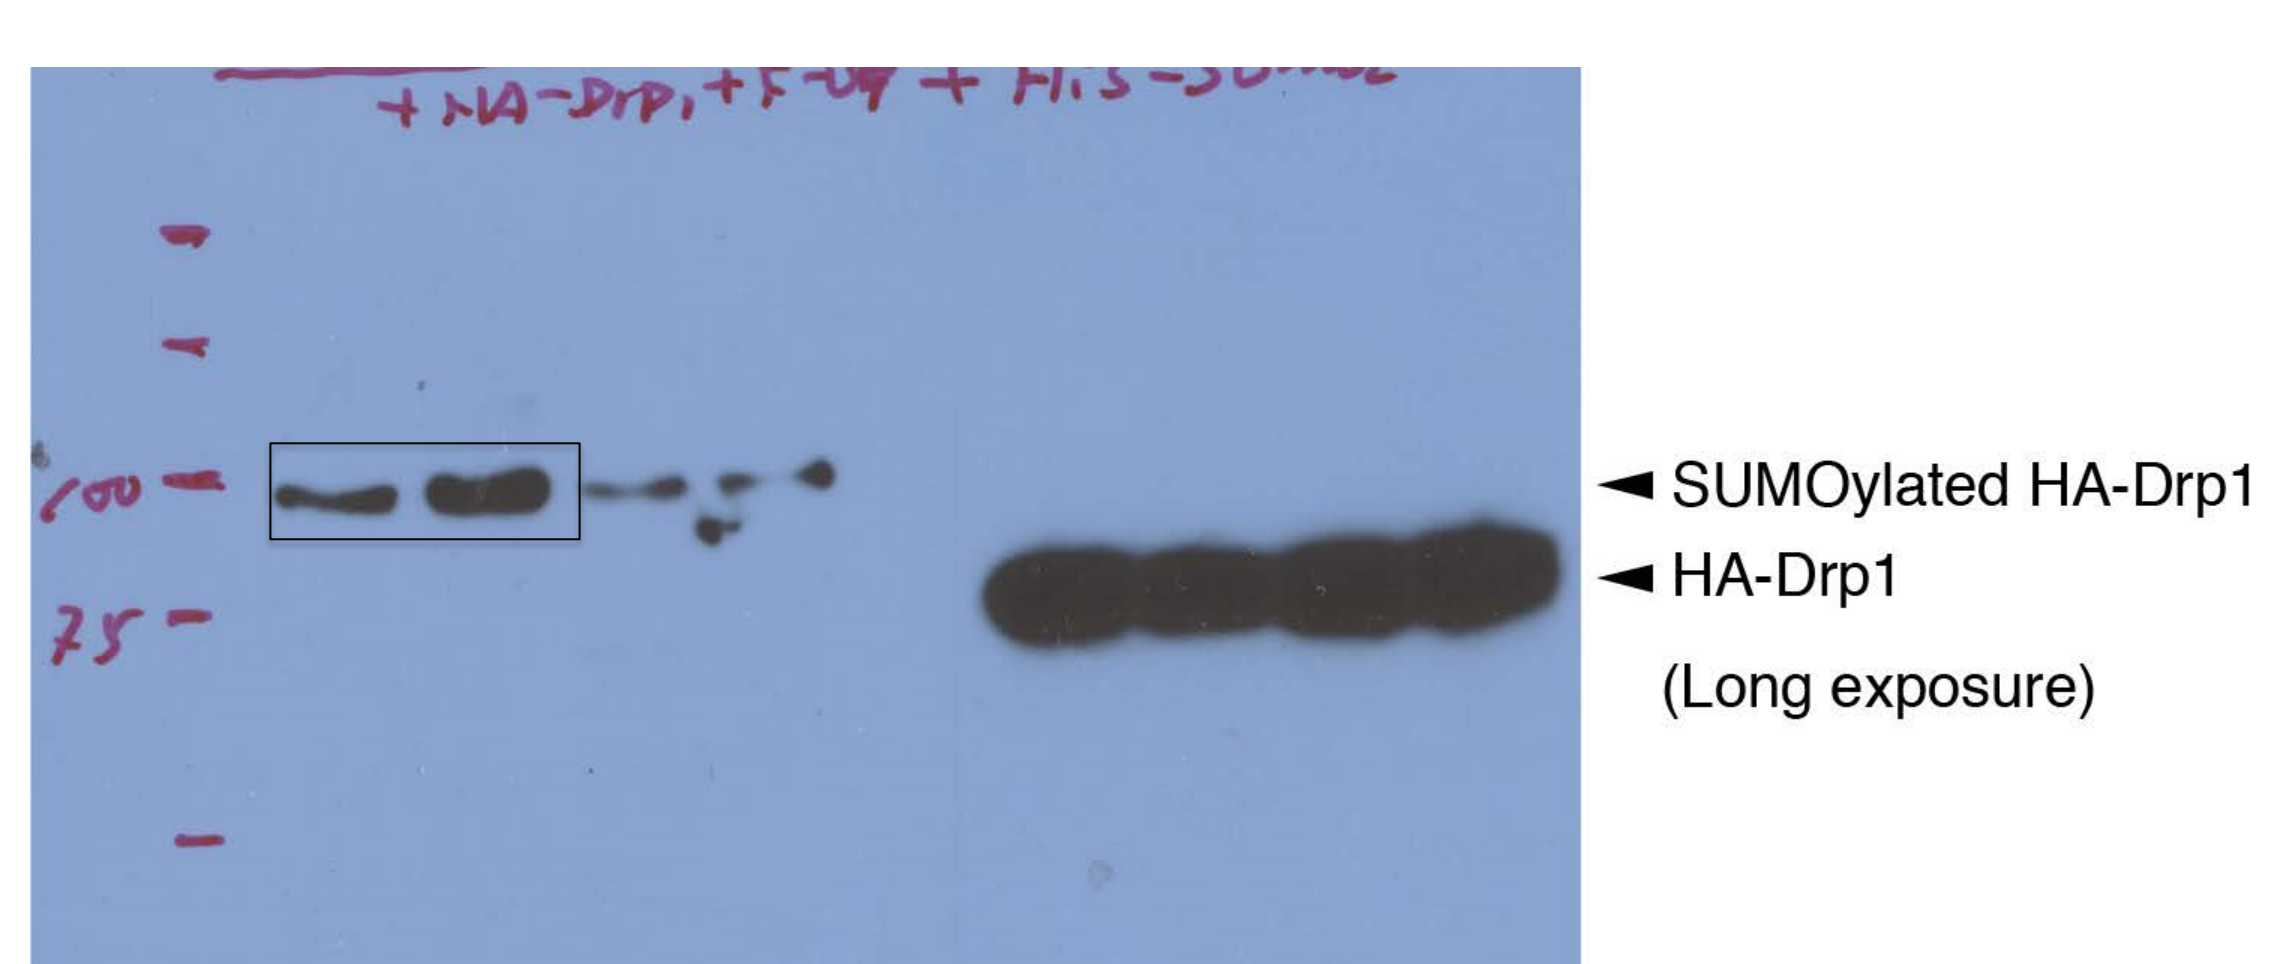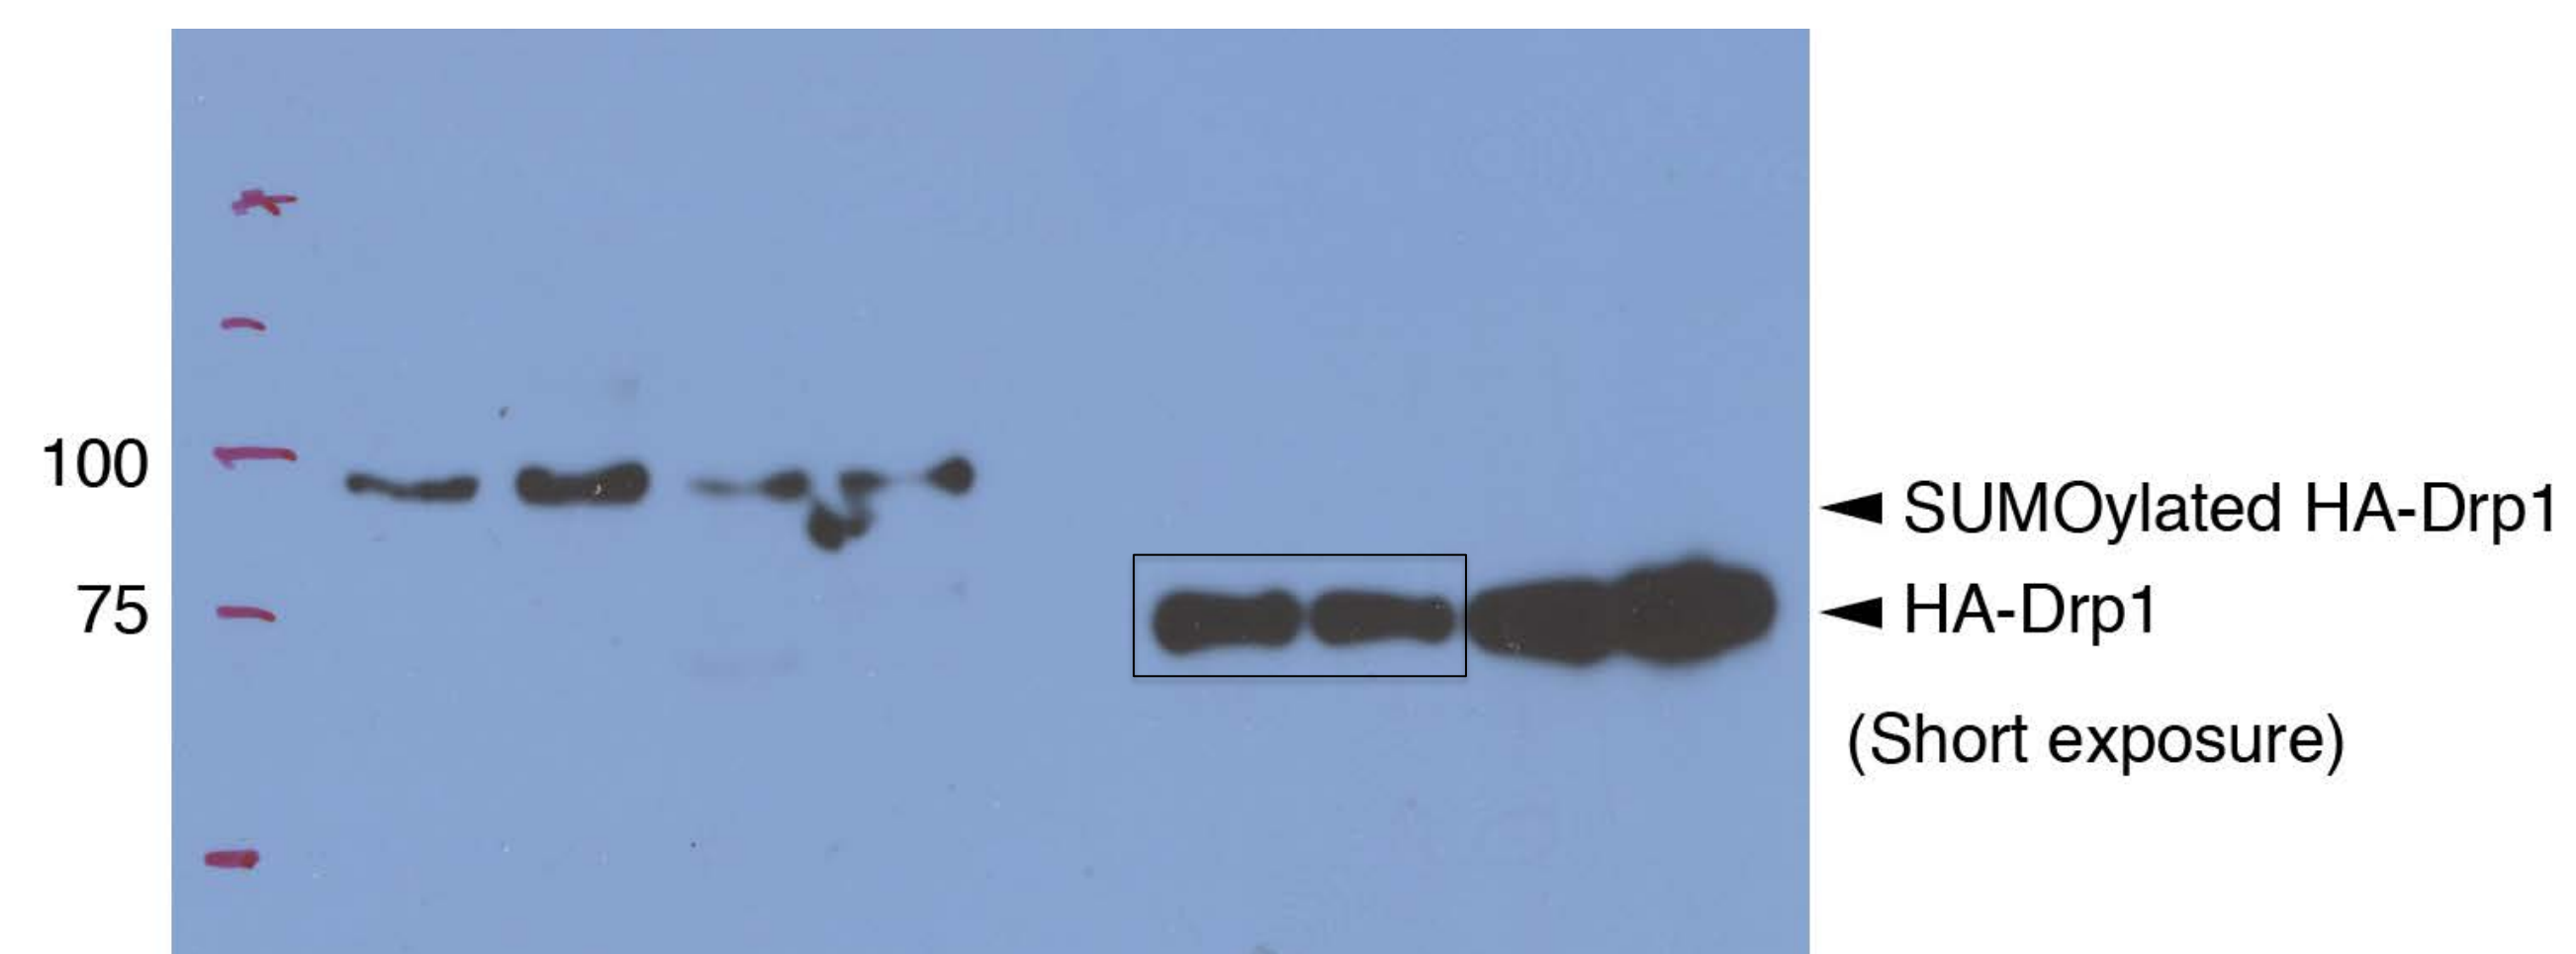**G**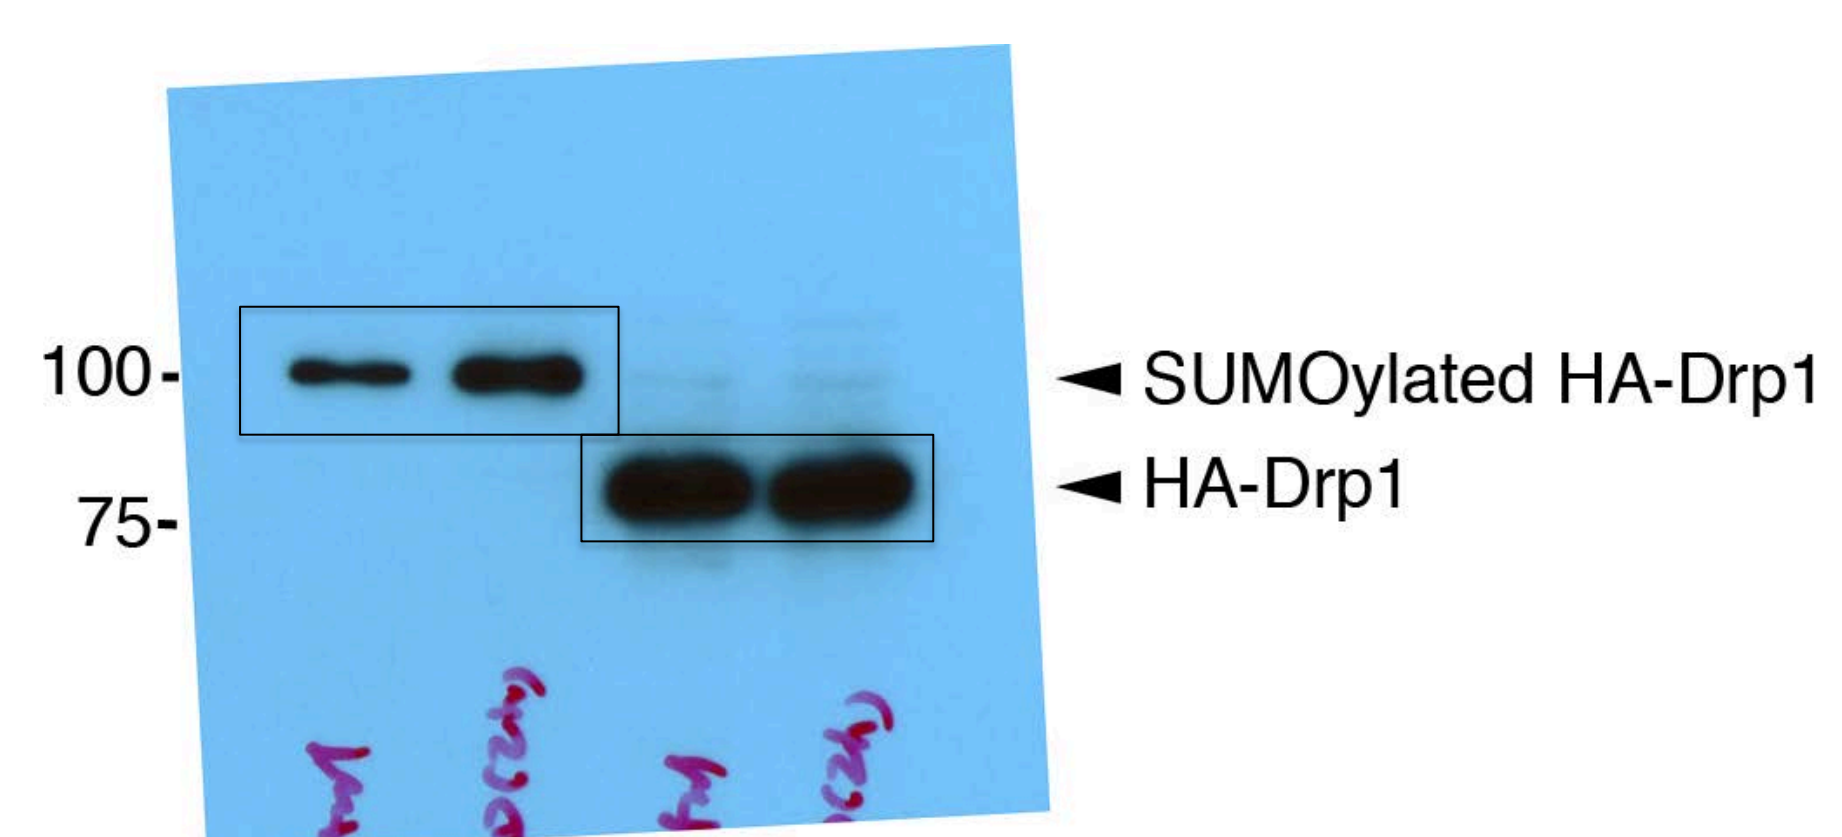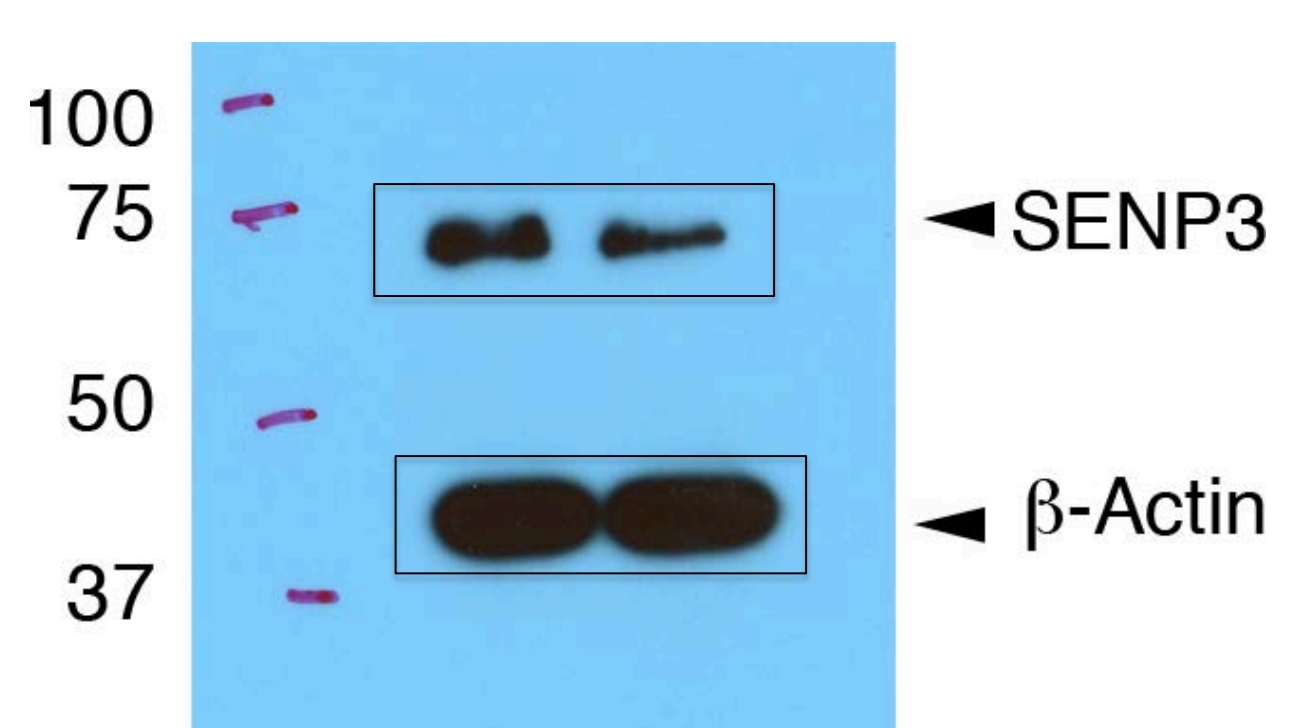**H**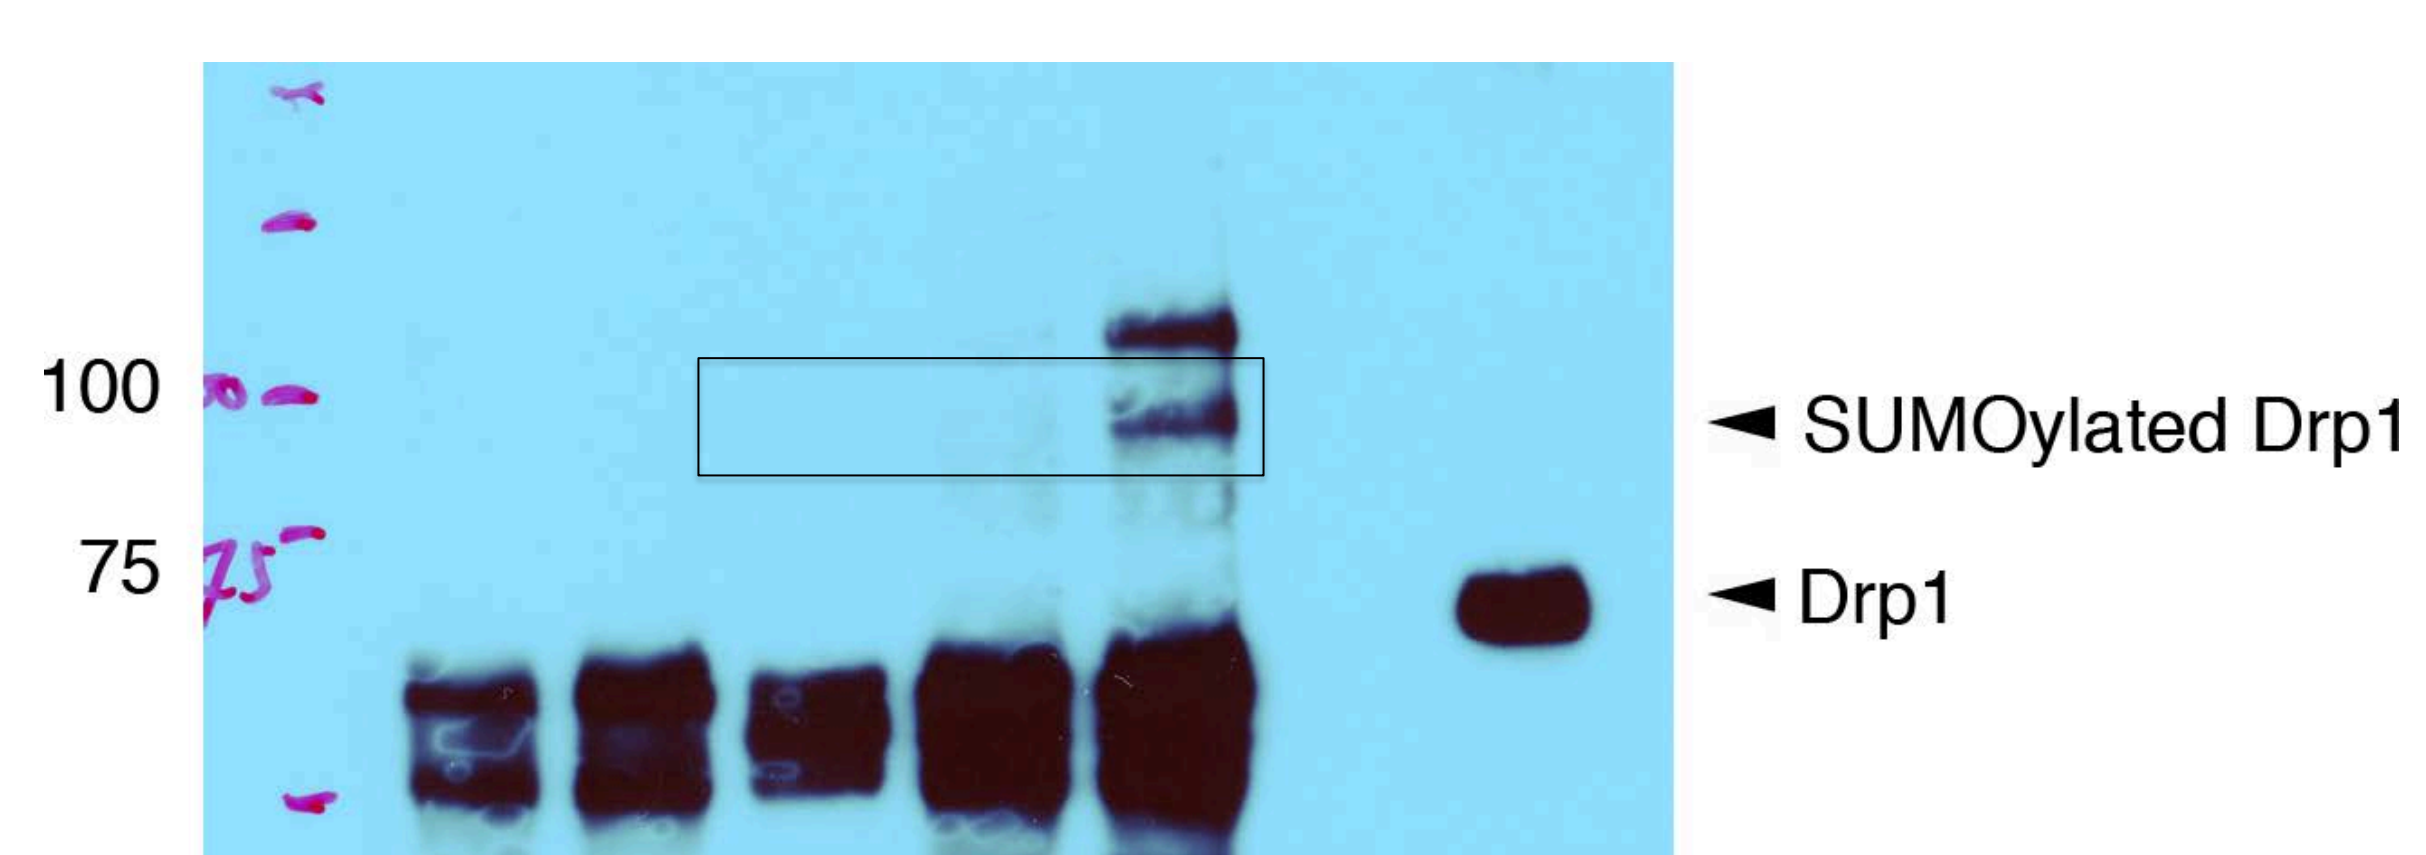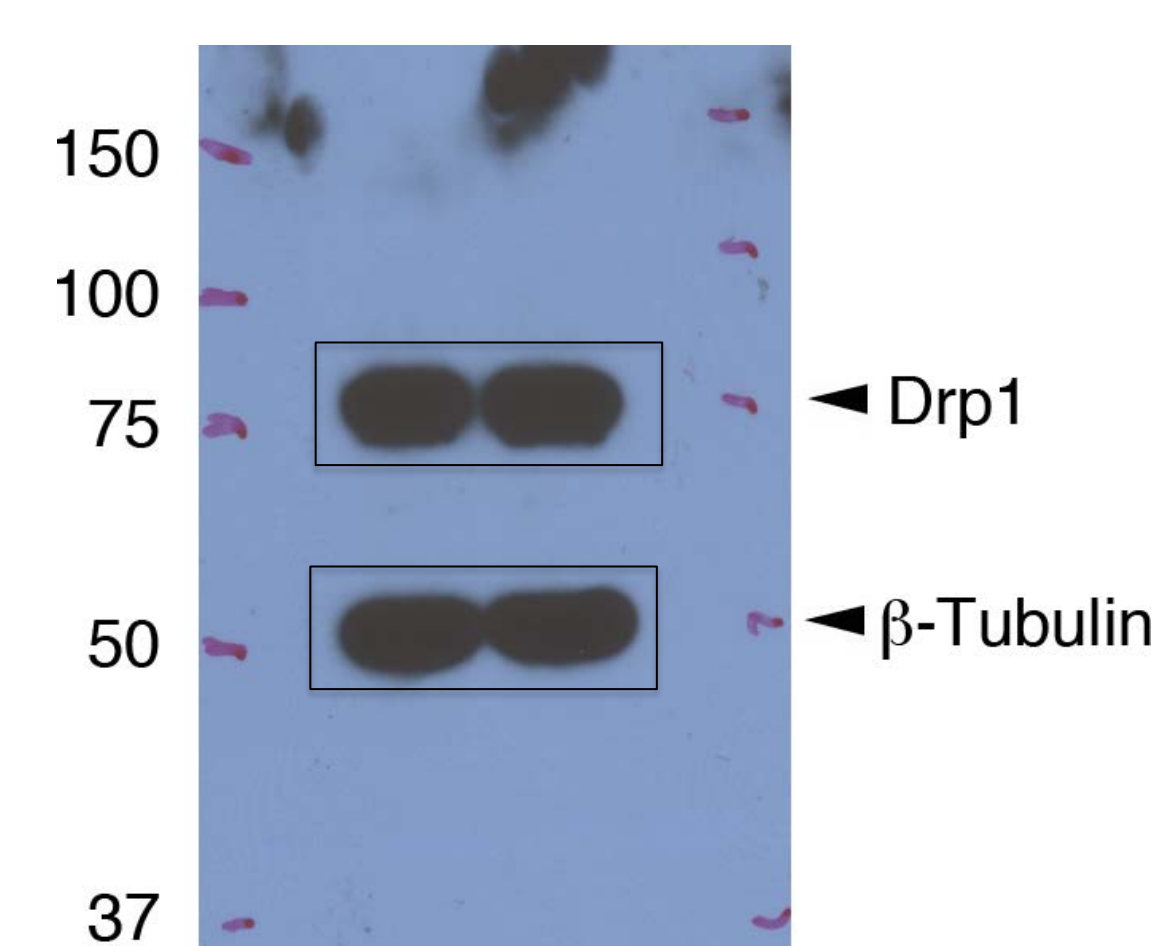**I**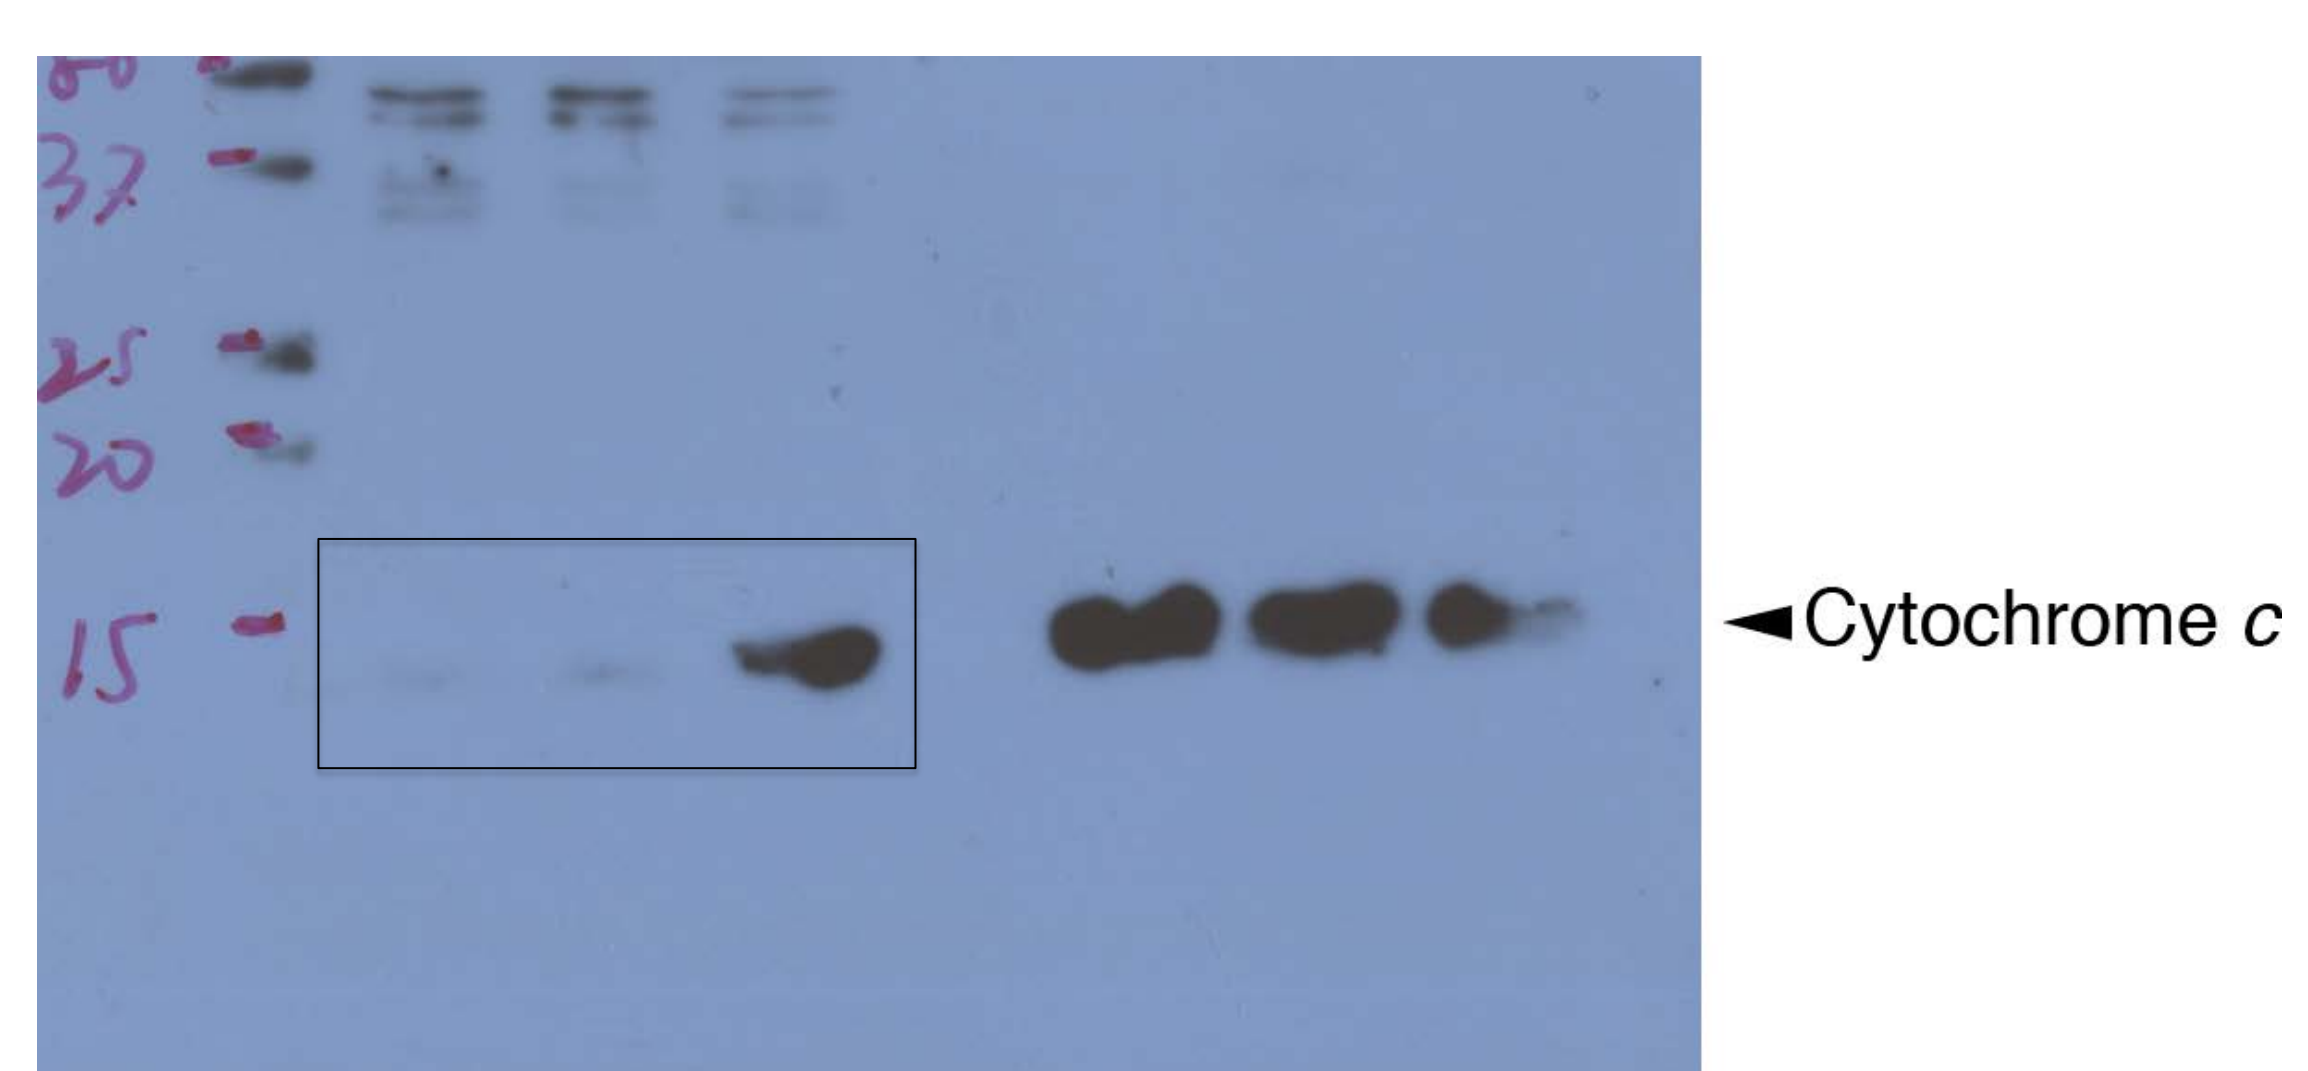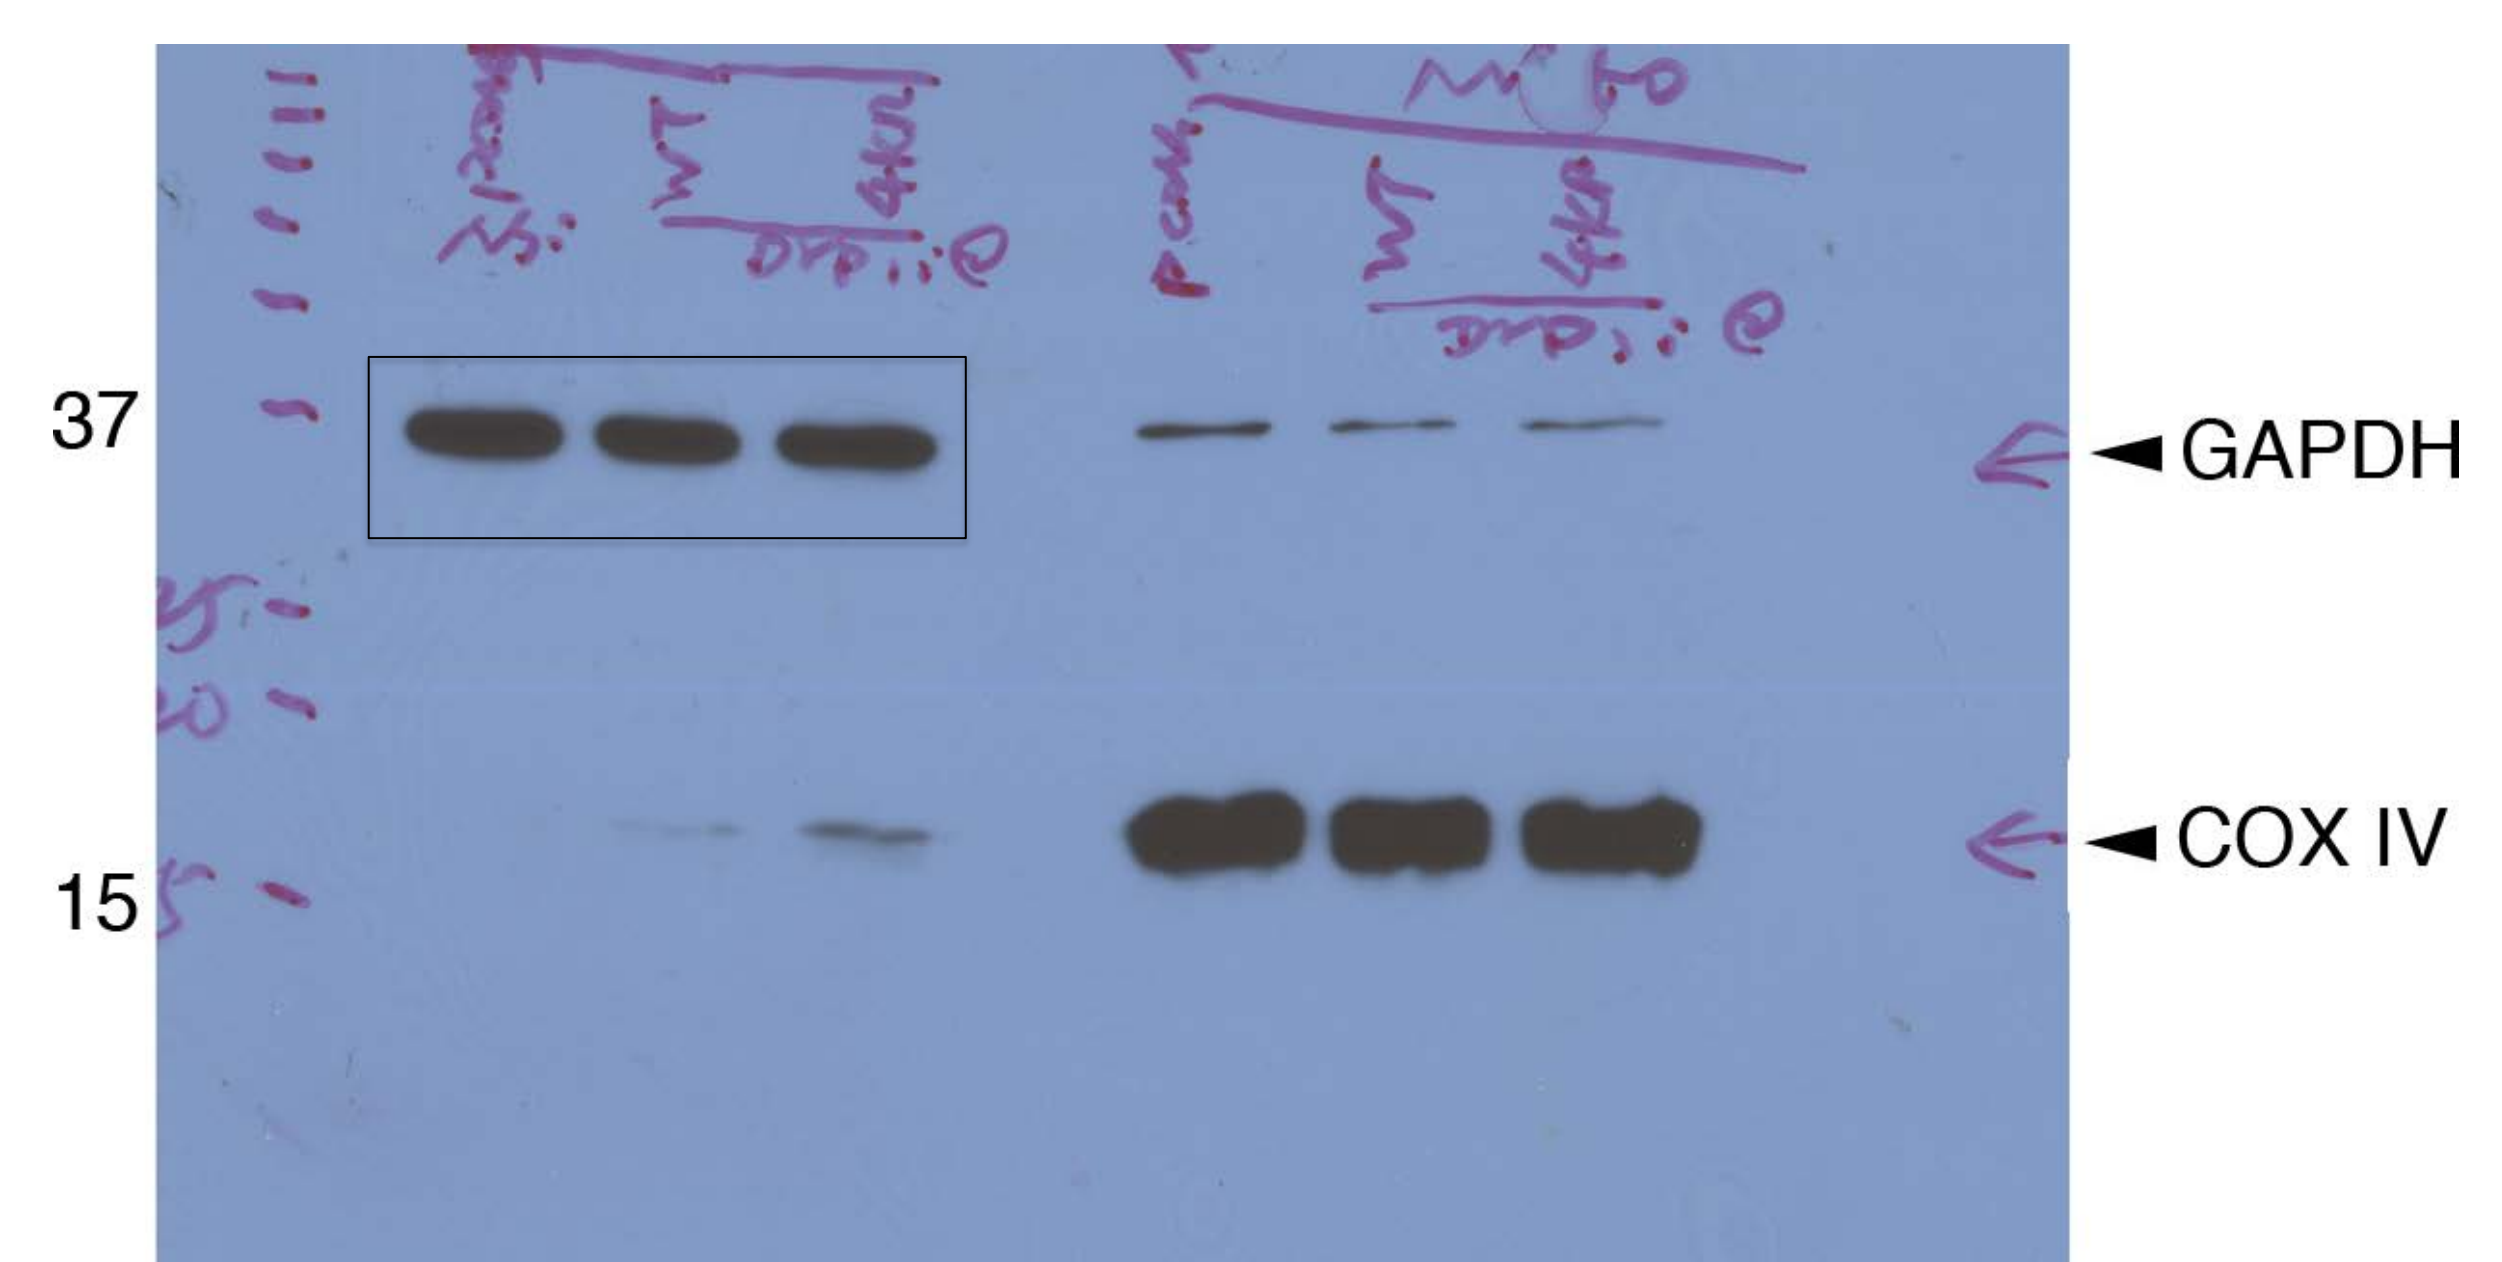

Supplement: emboj201365df3.pdf [file emboj201365df3.pdf]

**Figure 4**

**B**

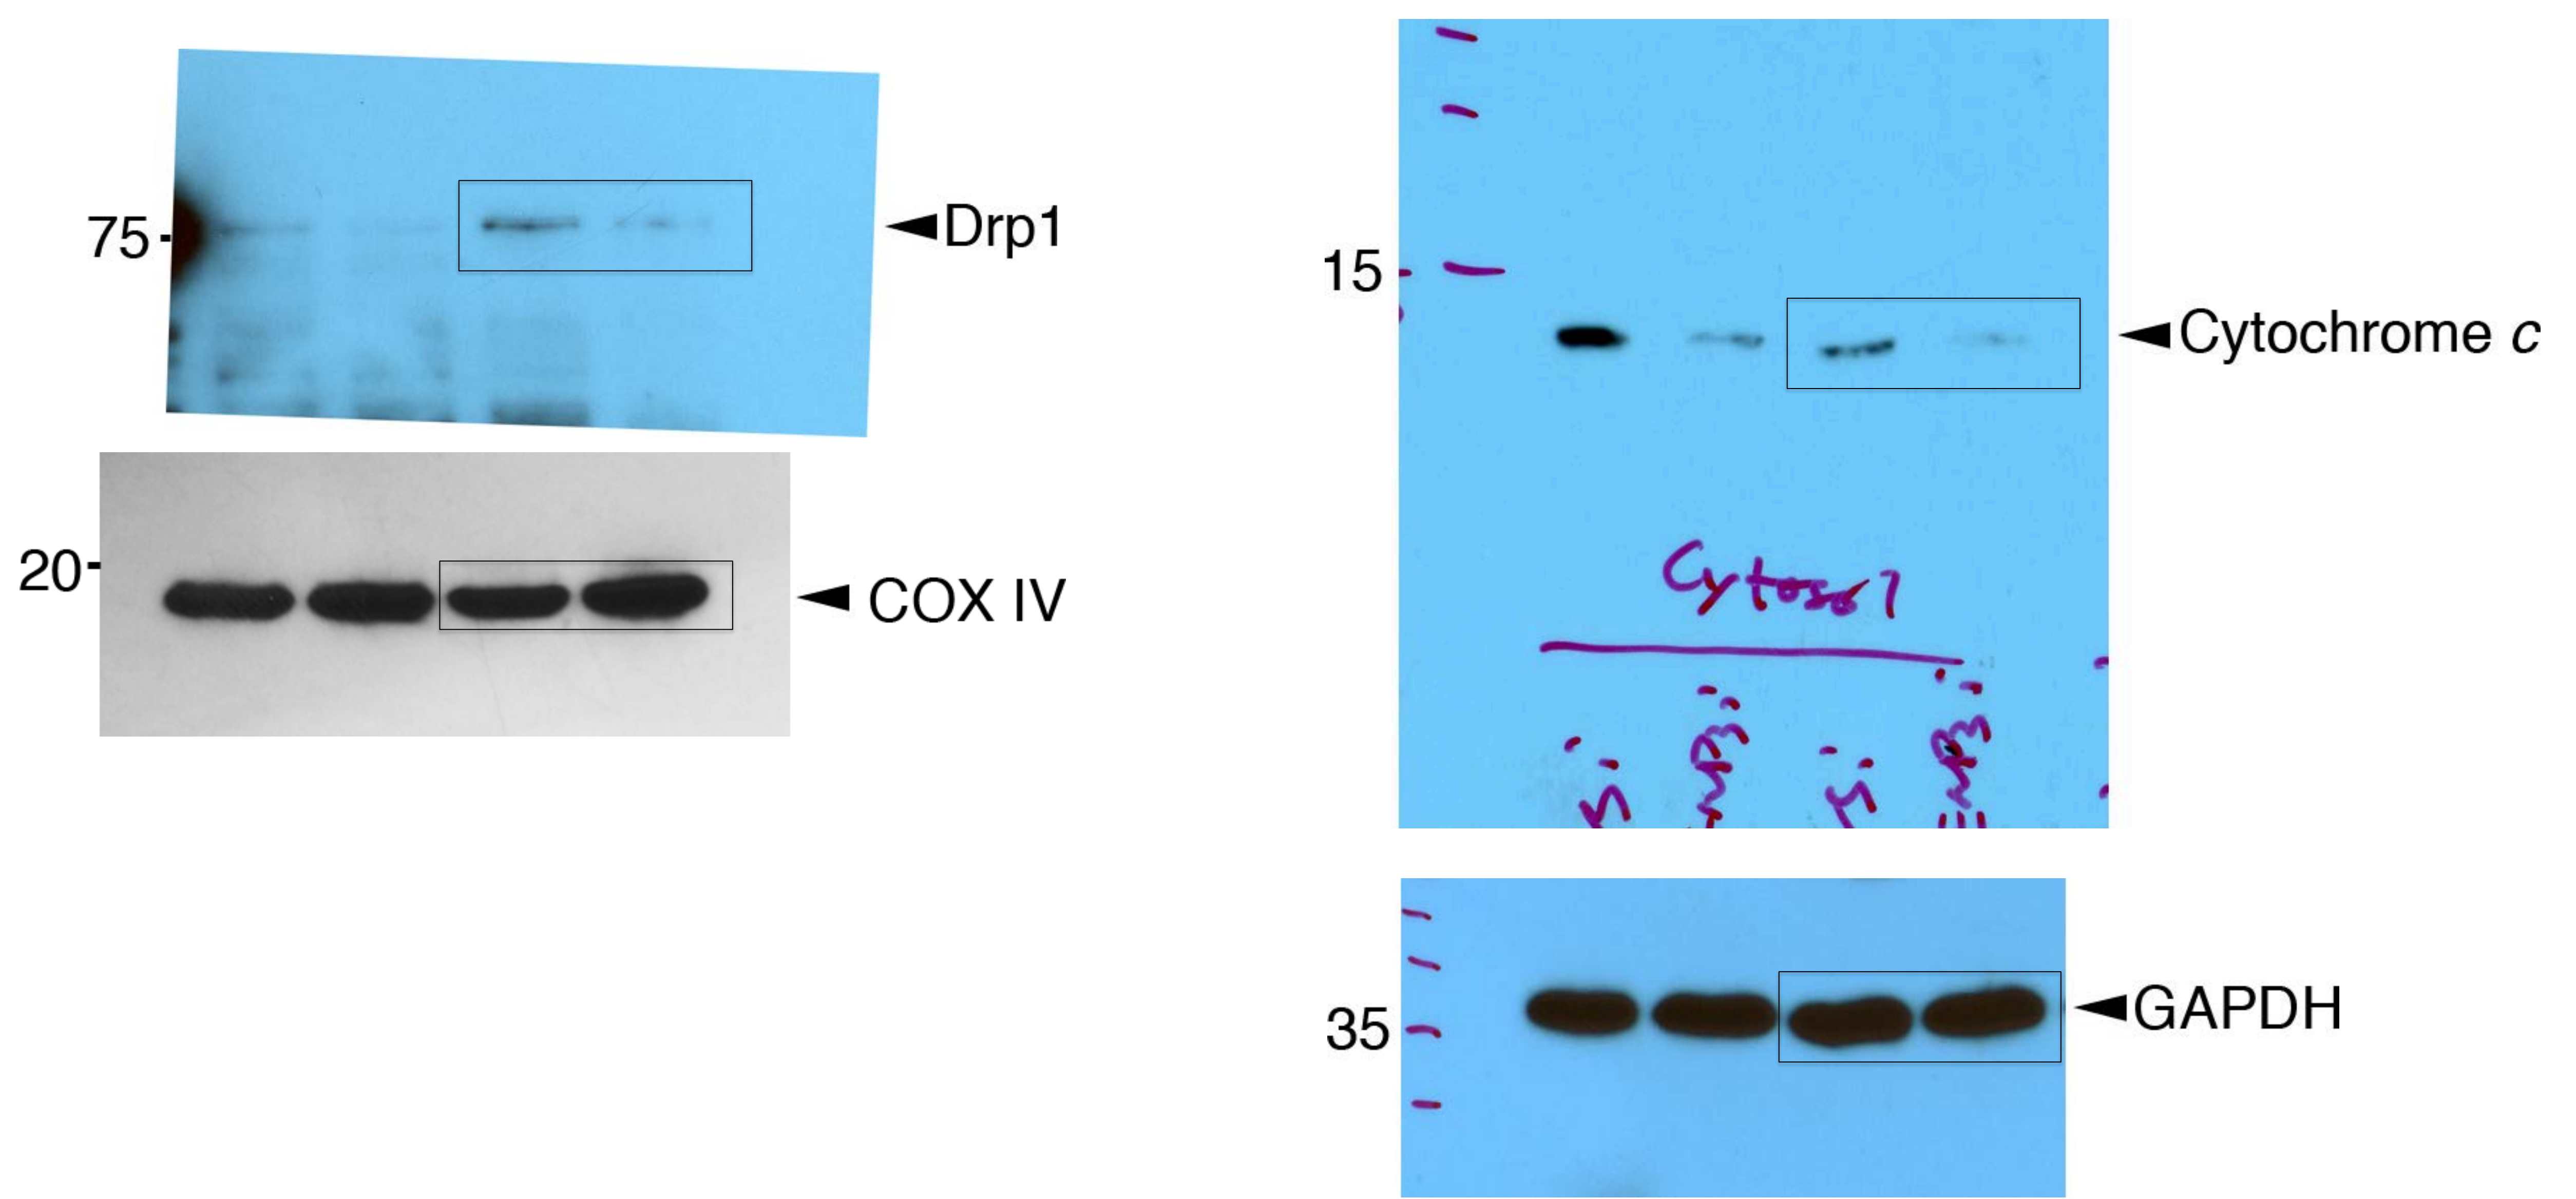

**D**

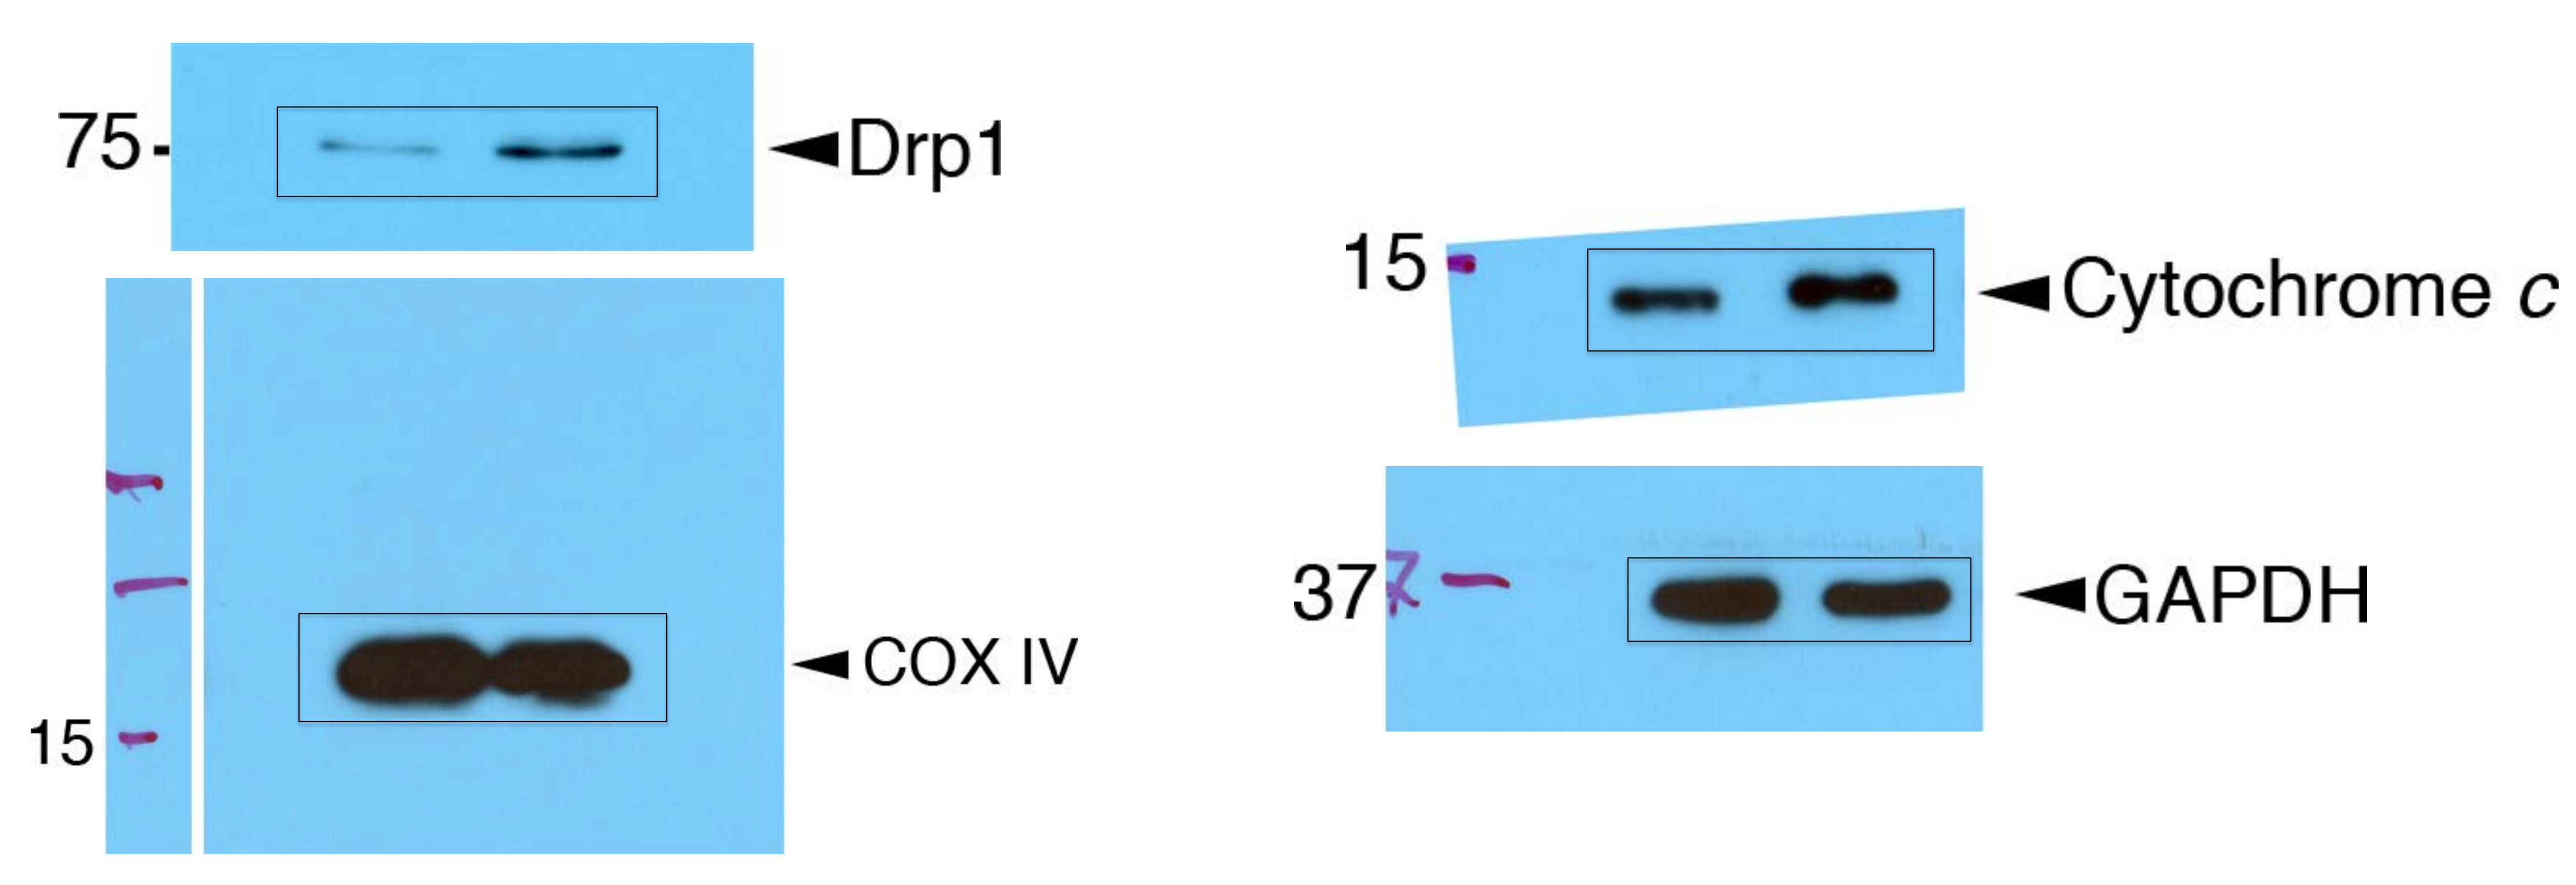

**F**

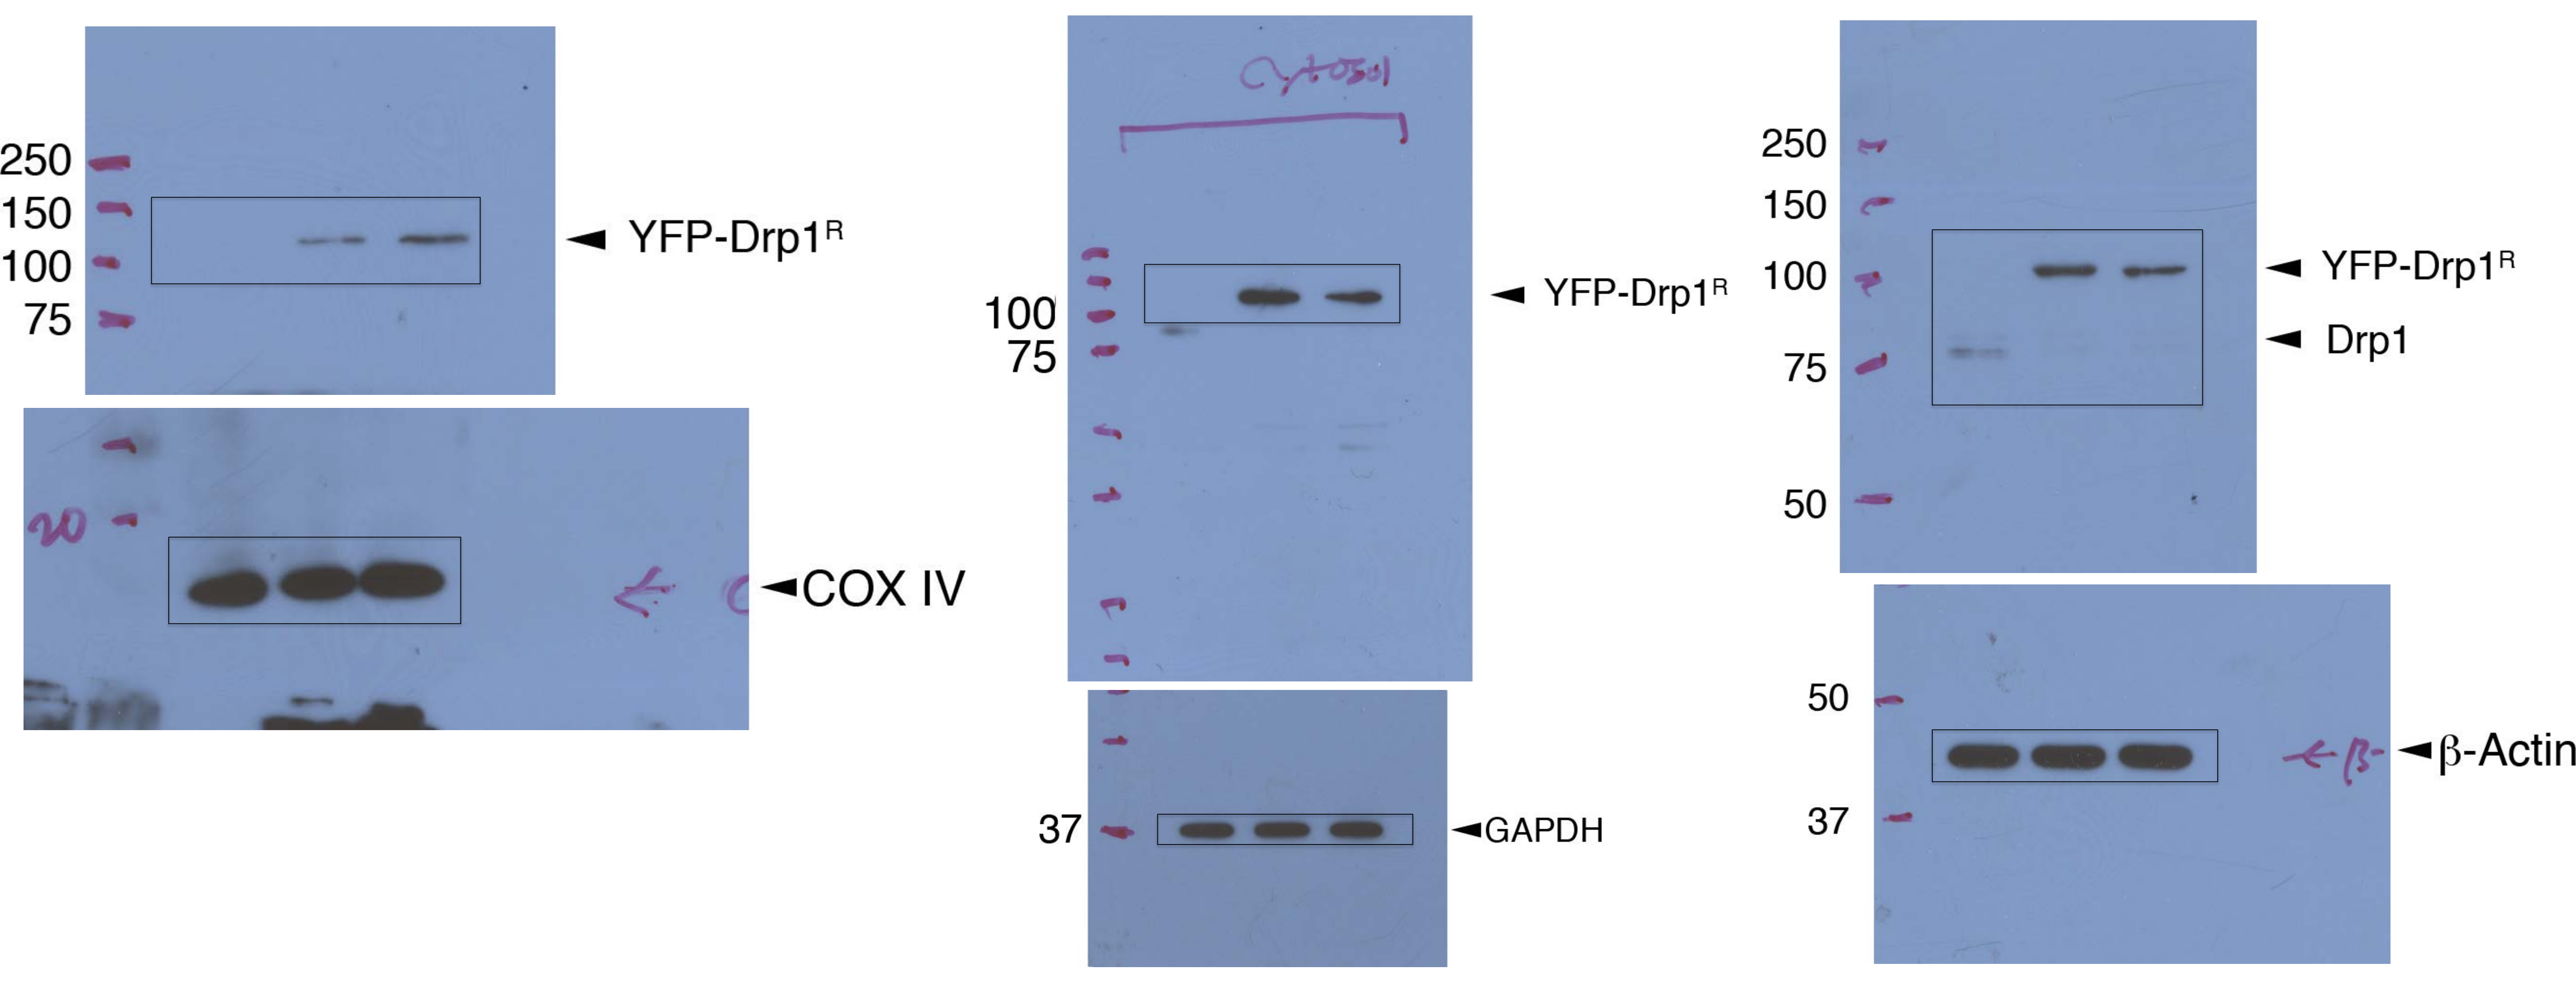

Supplement: emboj201365df4.pdf [file emboj201365df4.pdf]

**Figure 6**

**A**

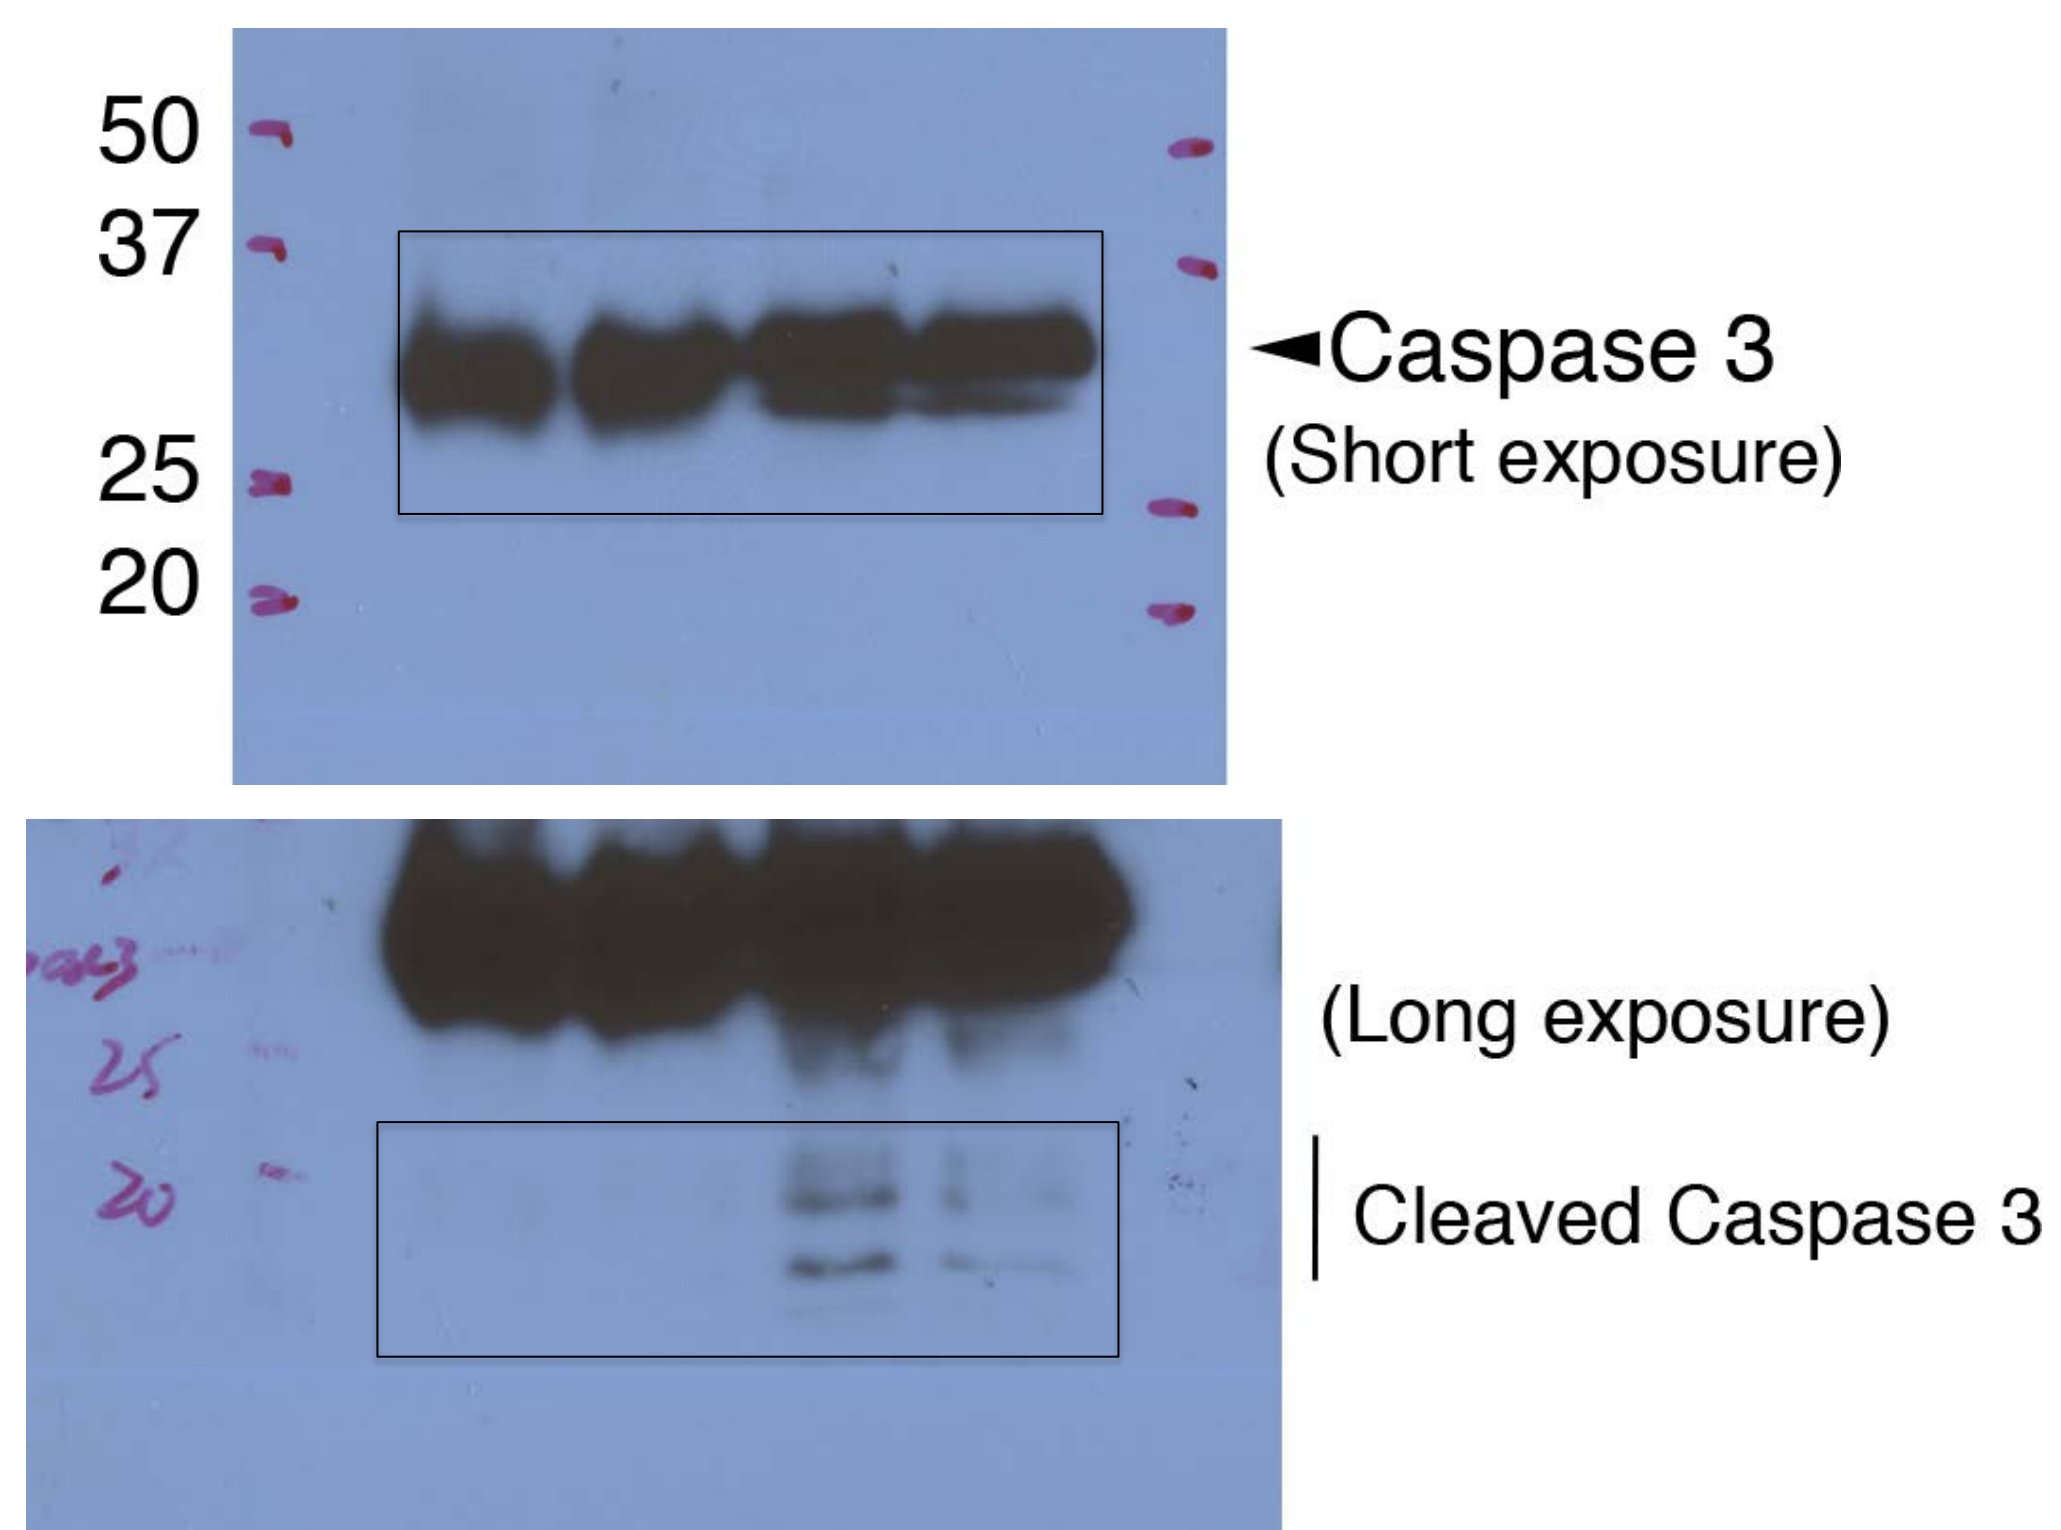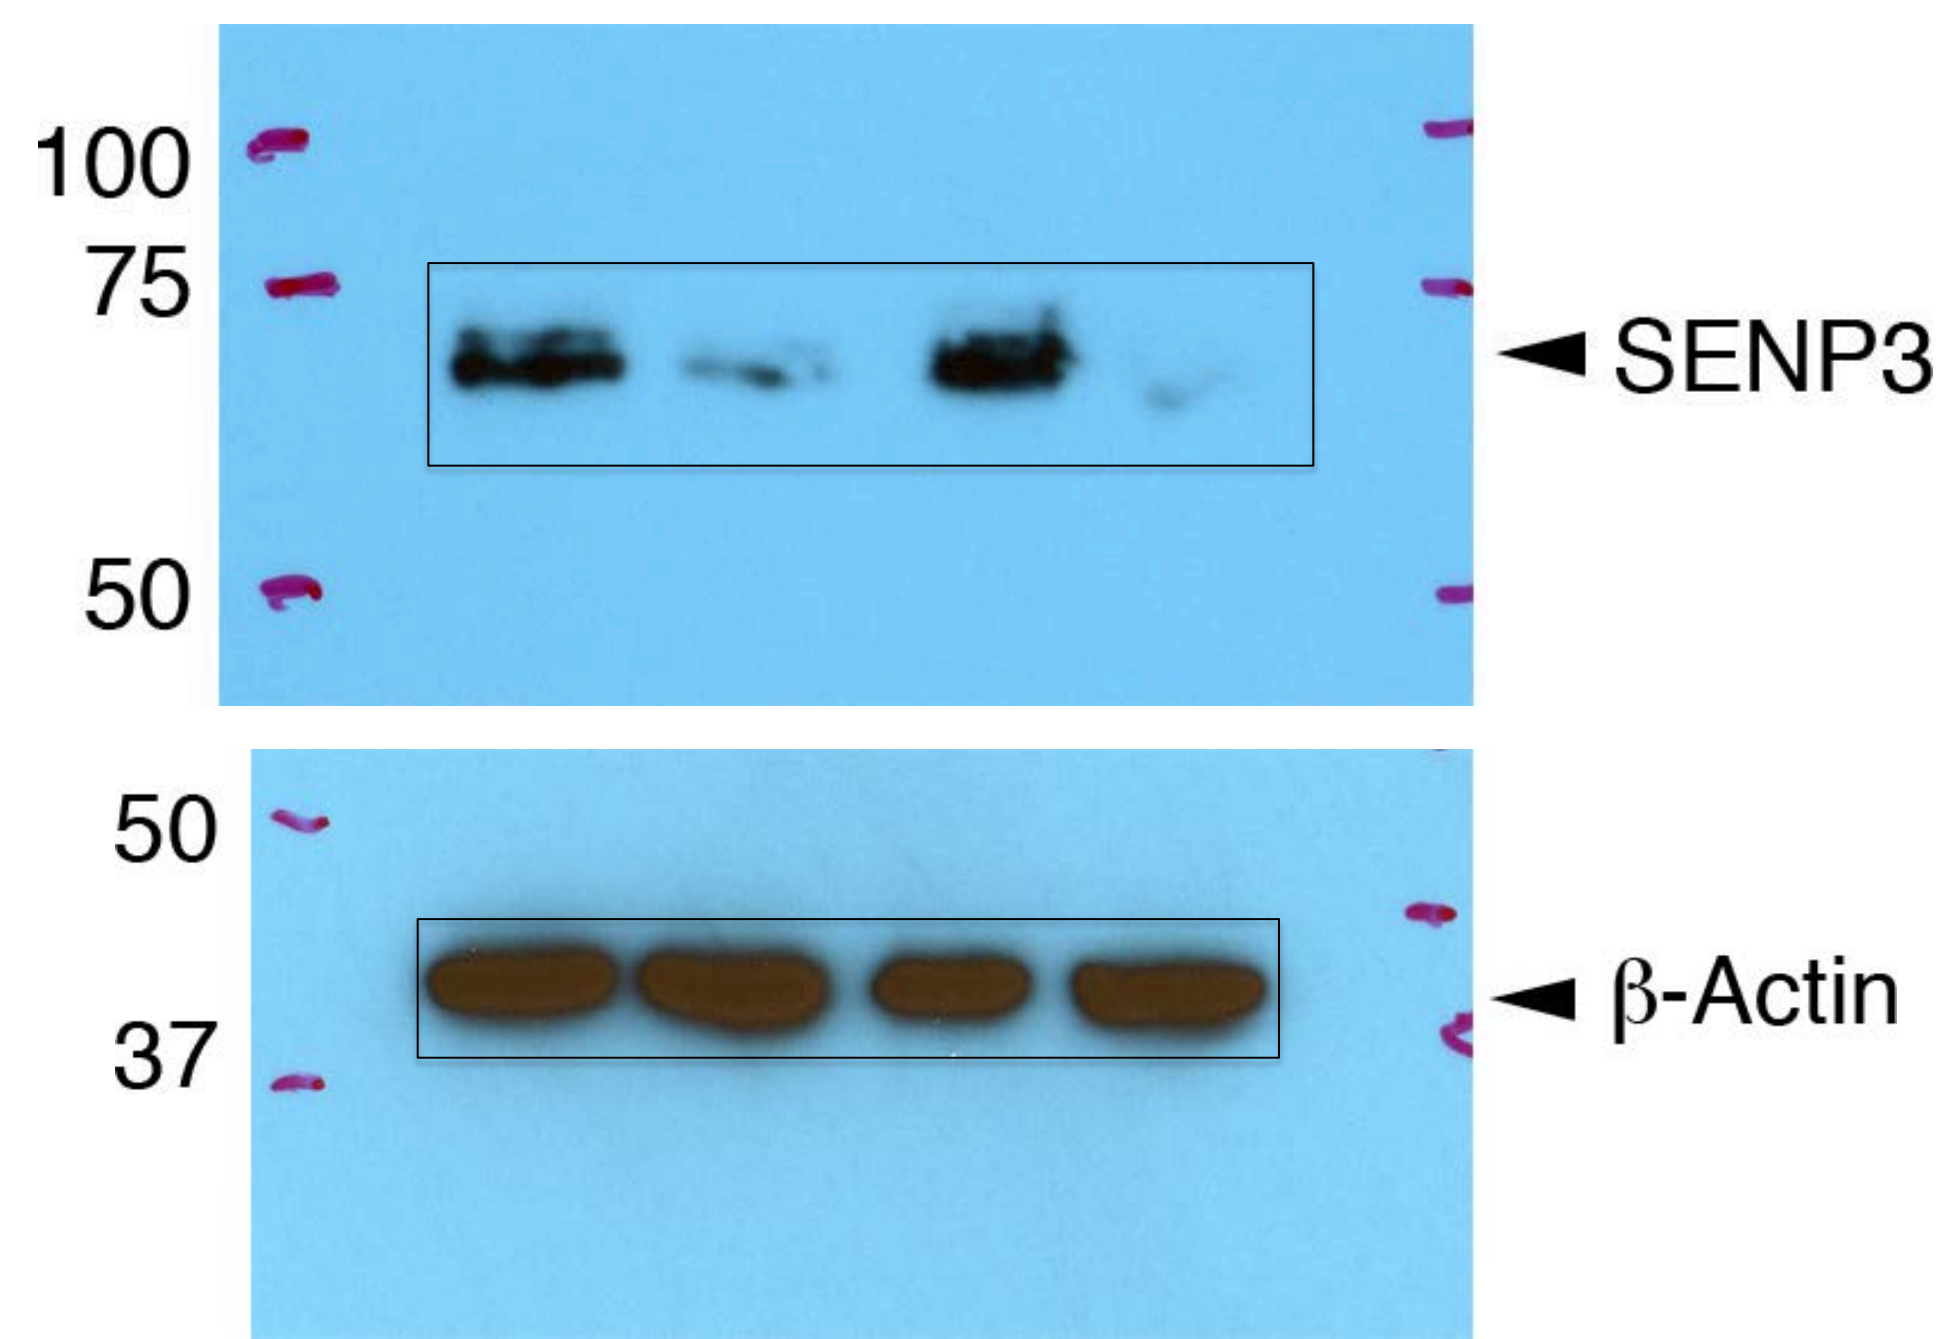

**C**

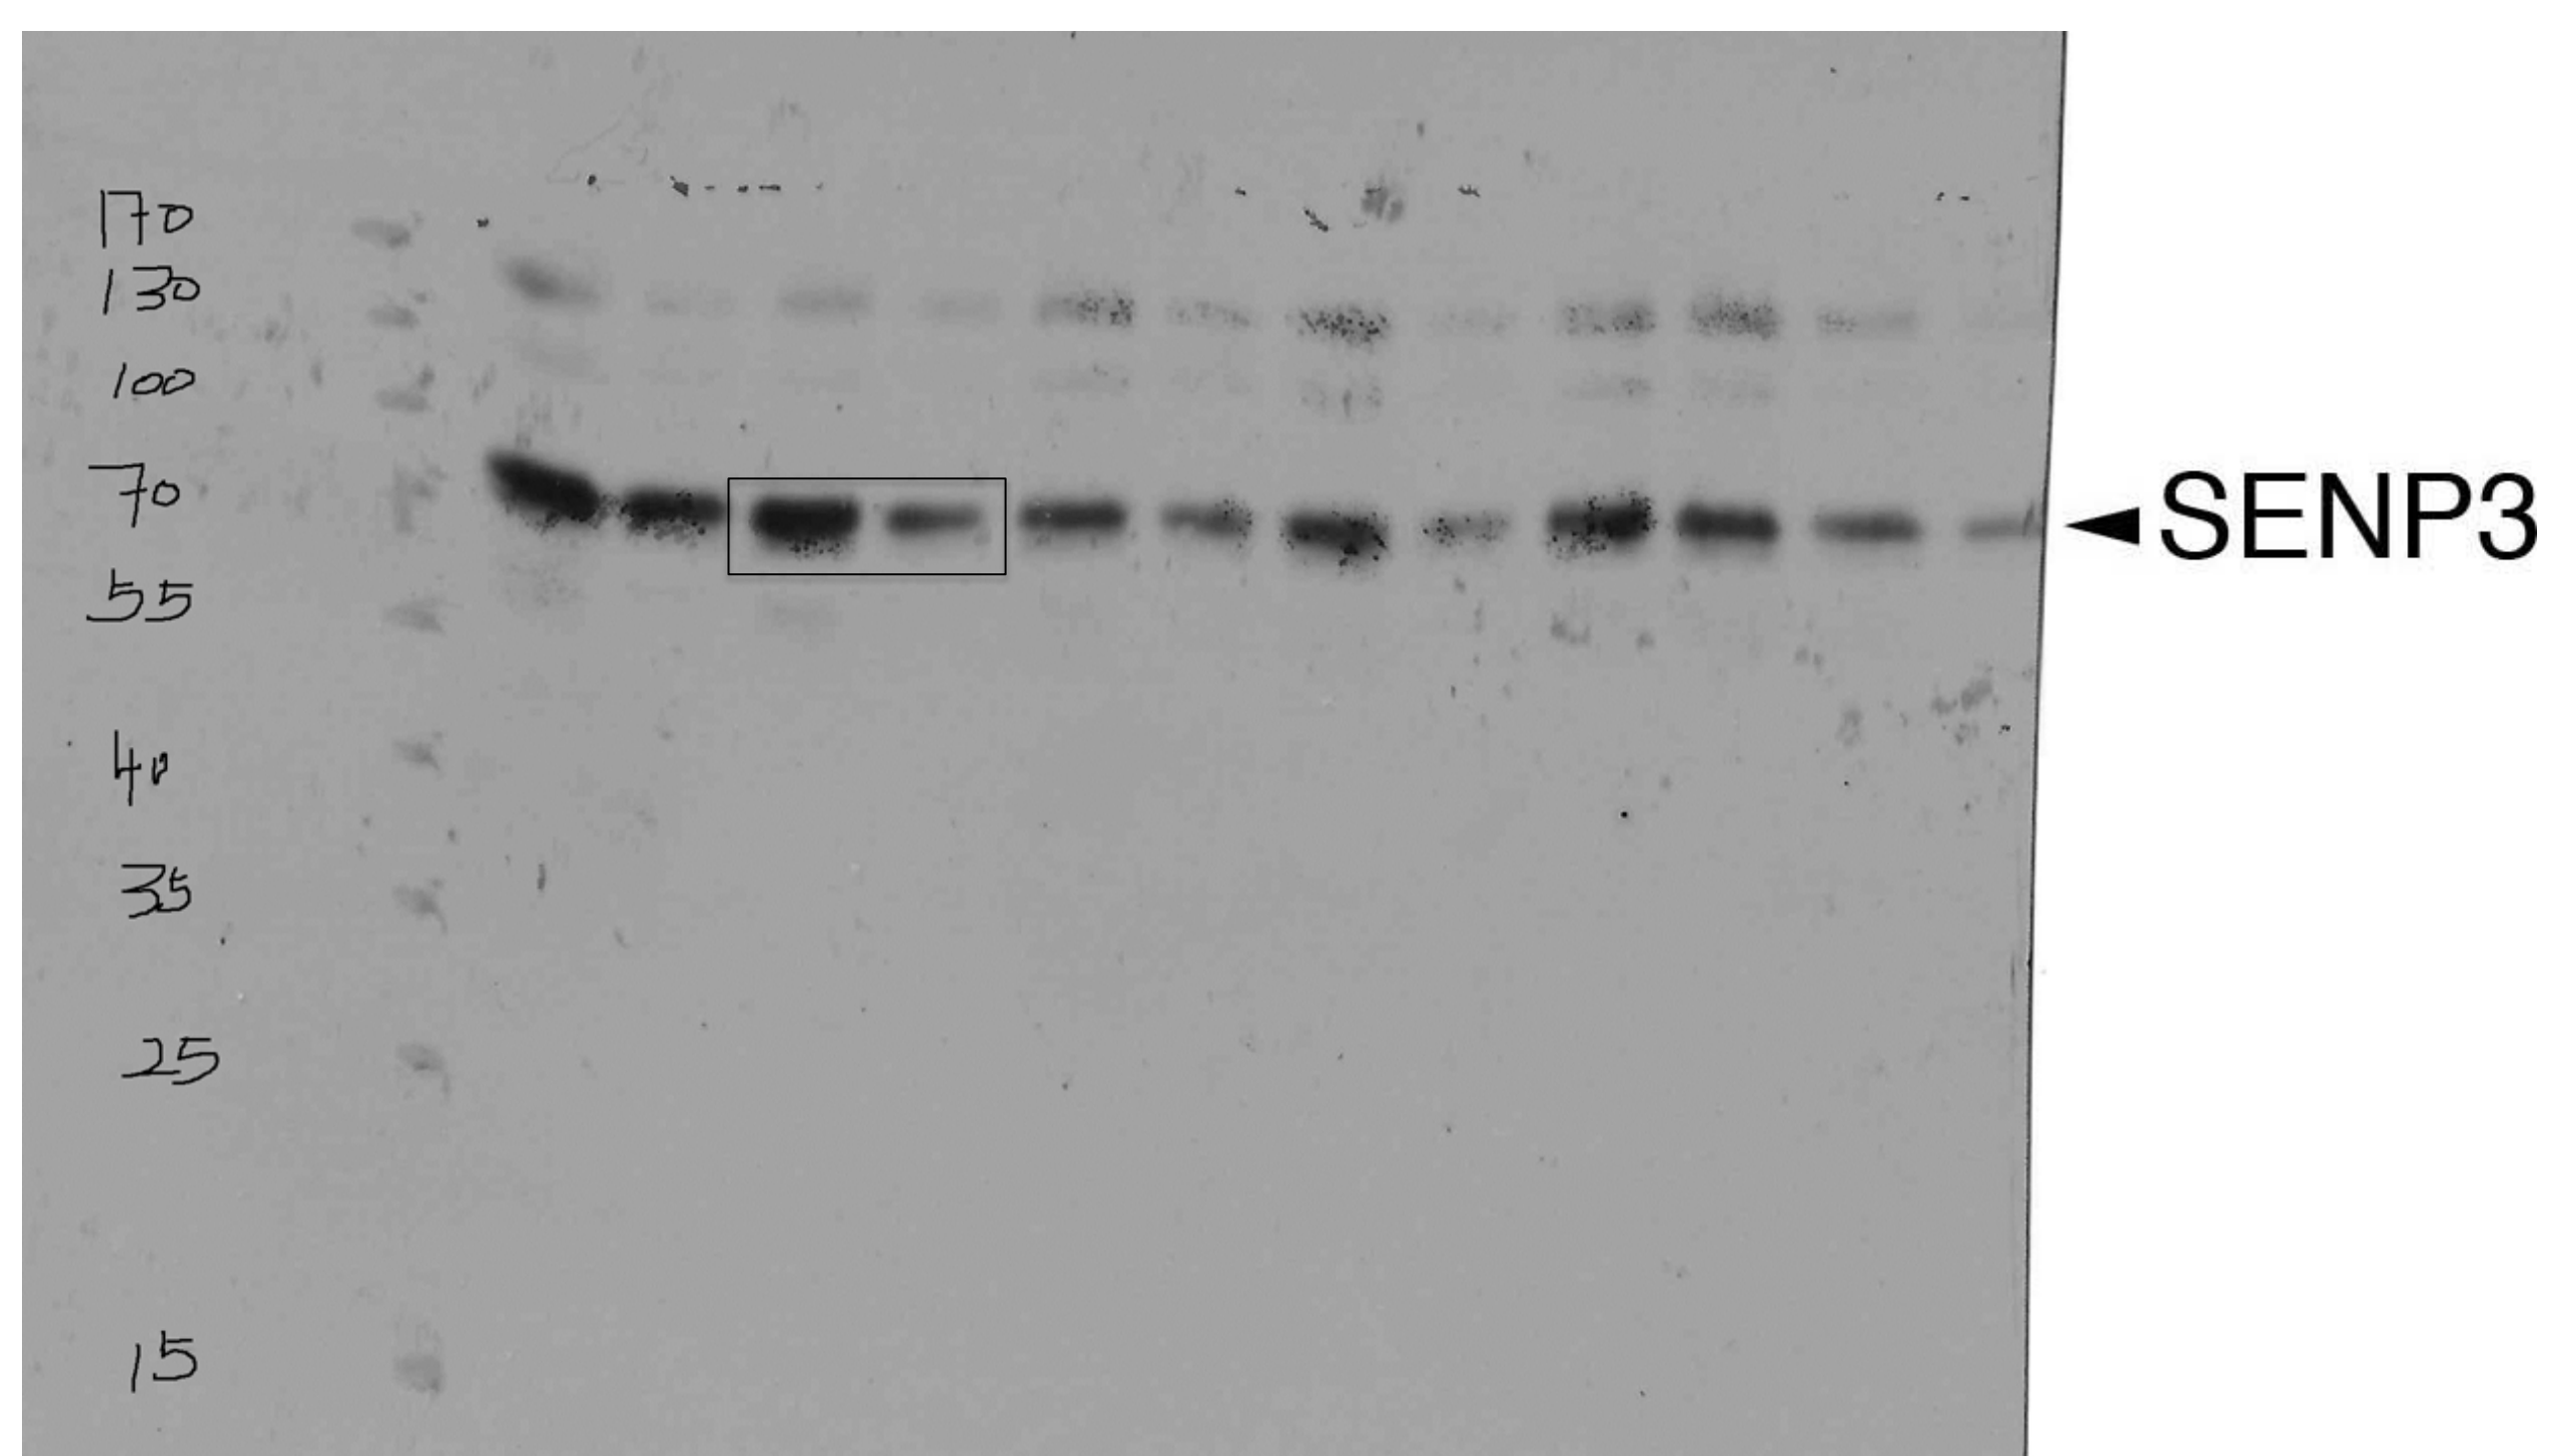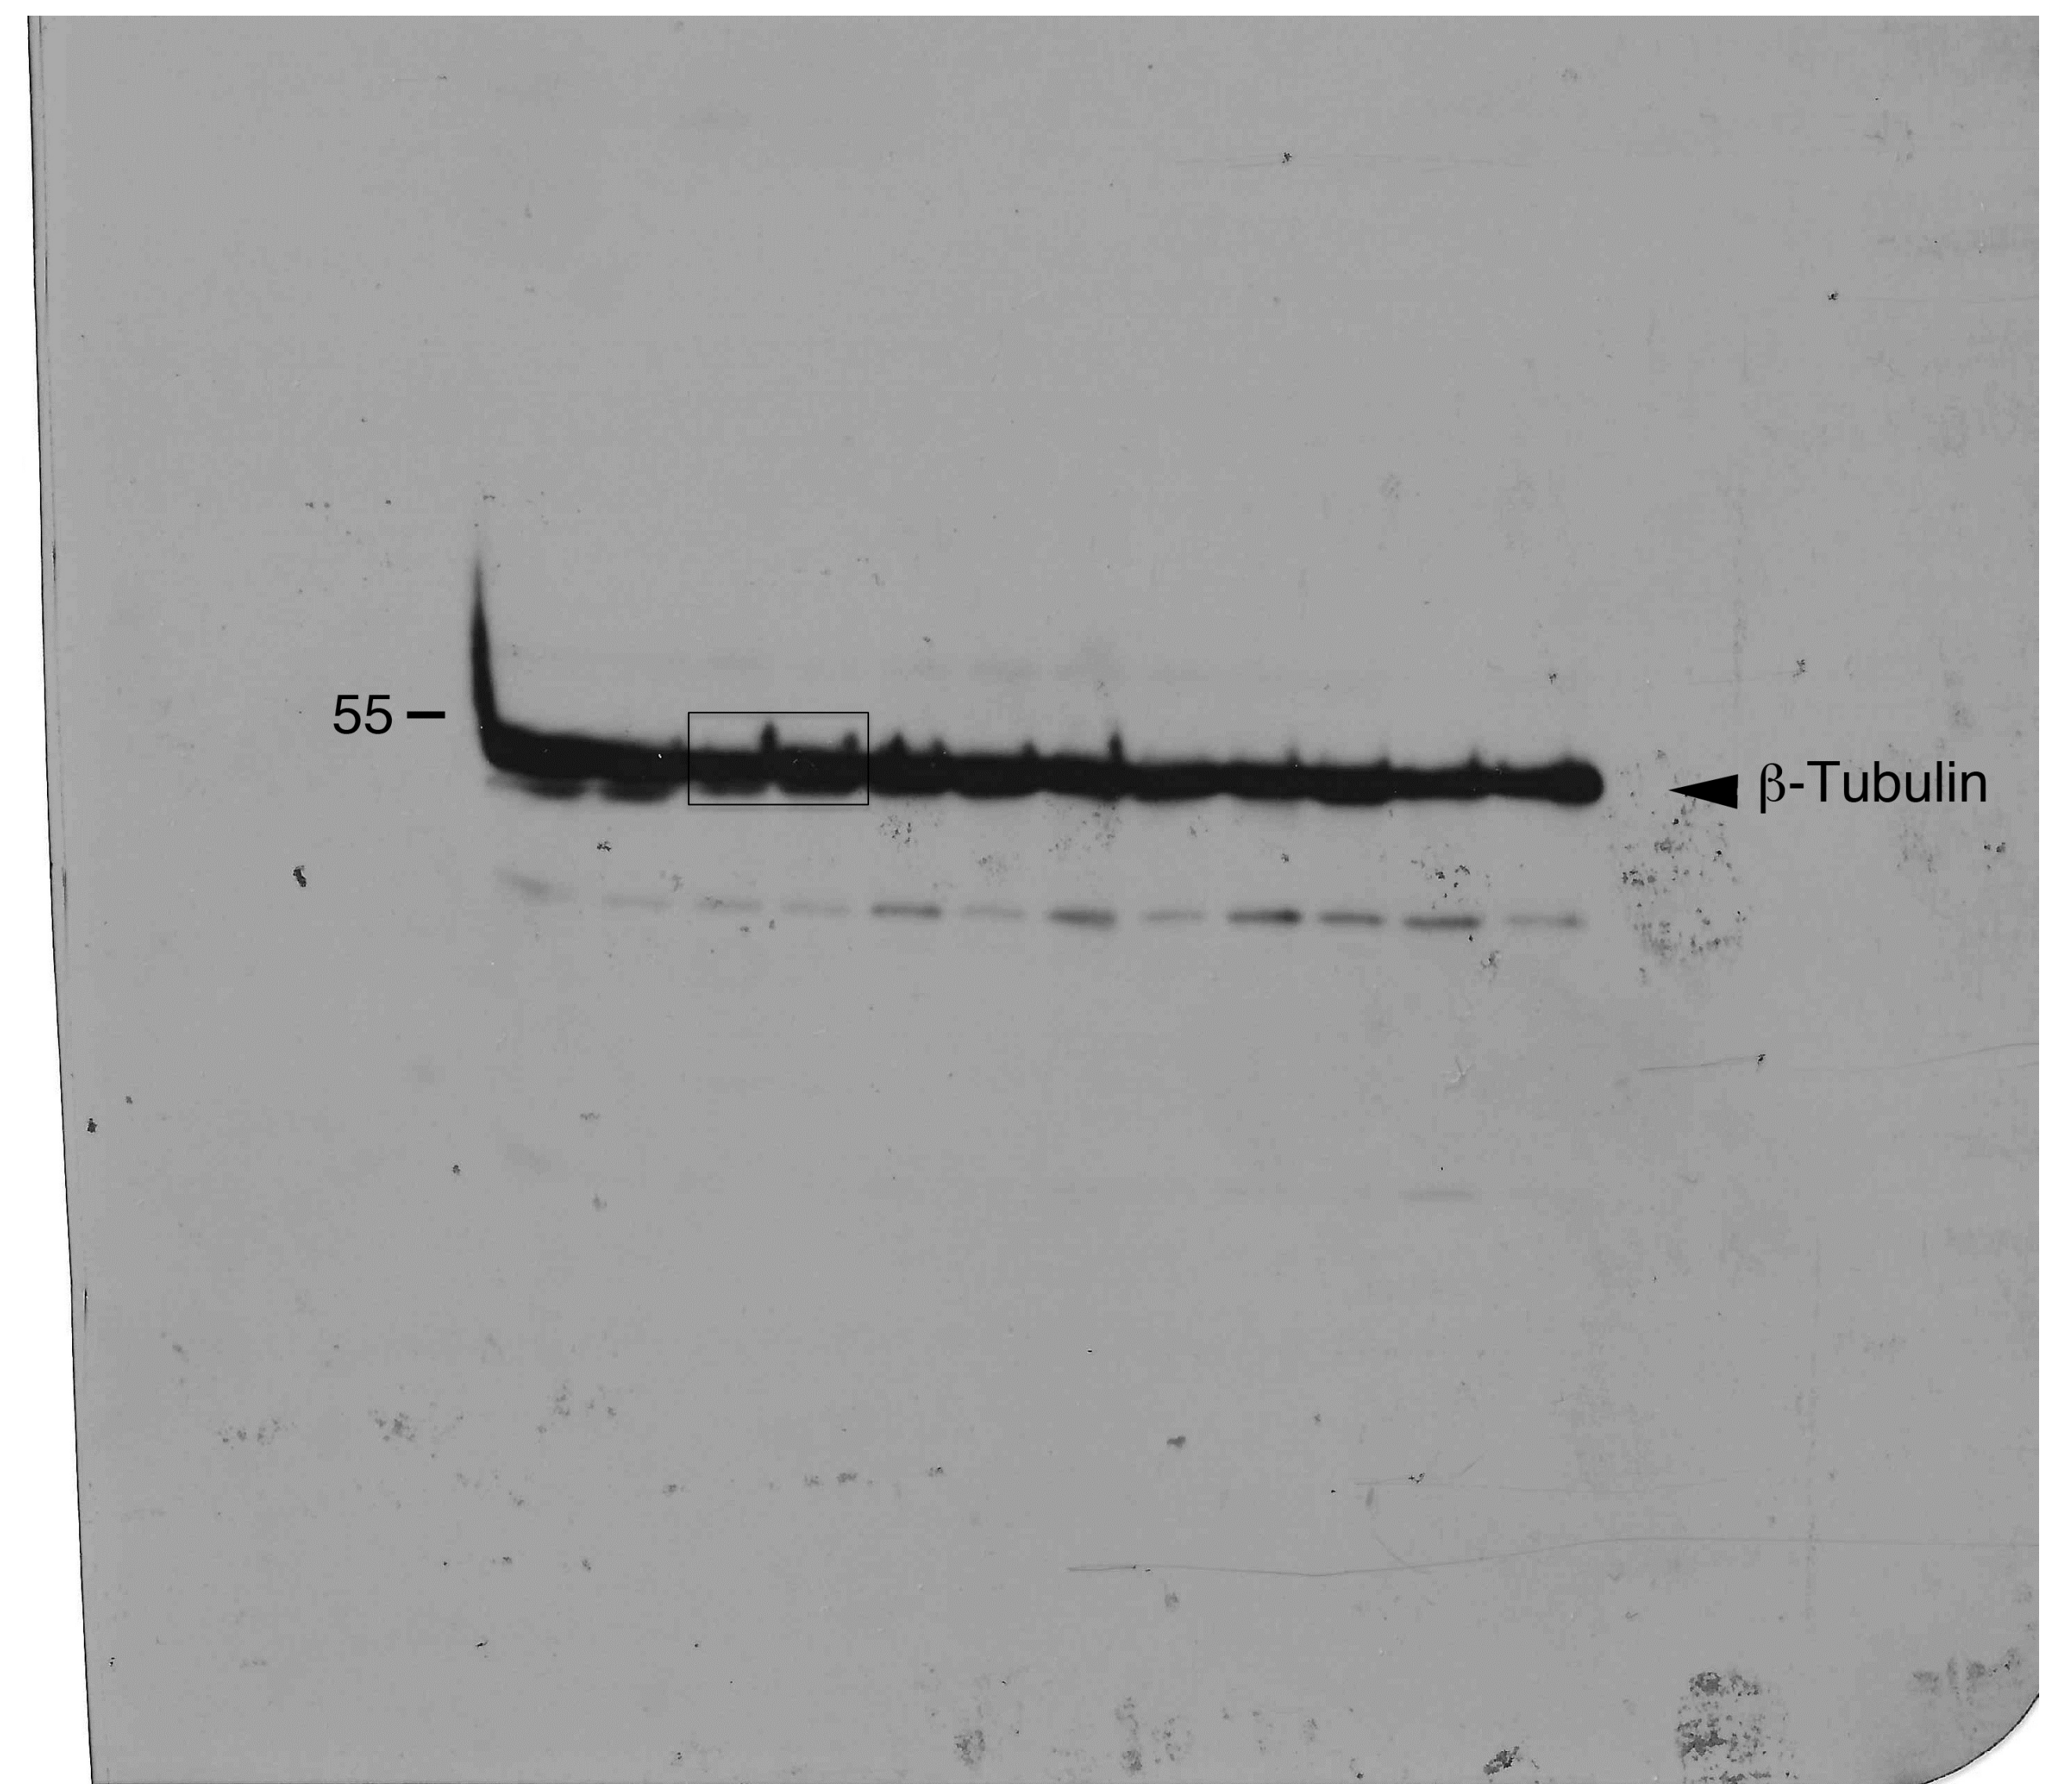

**D**

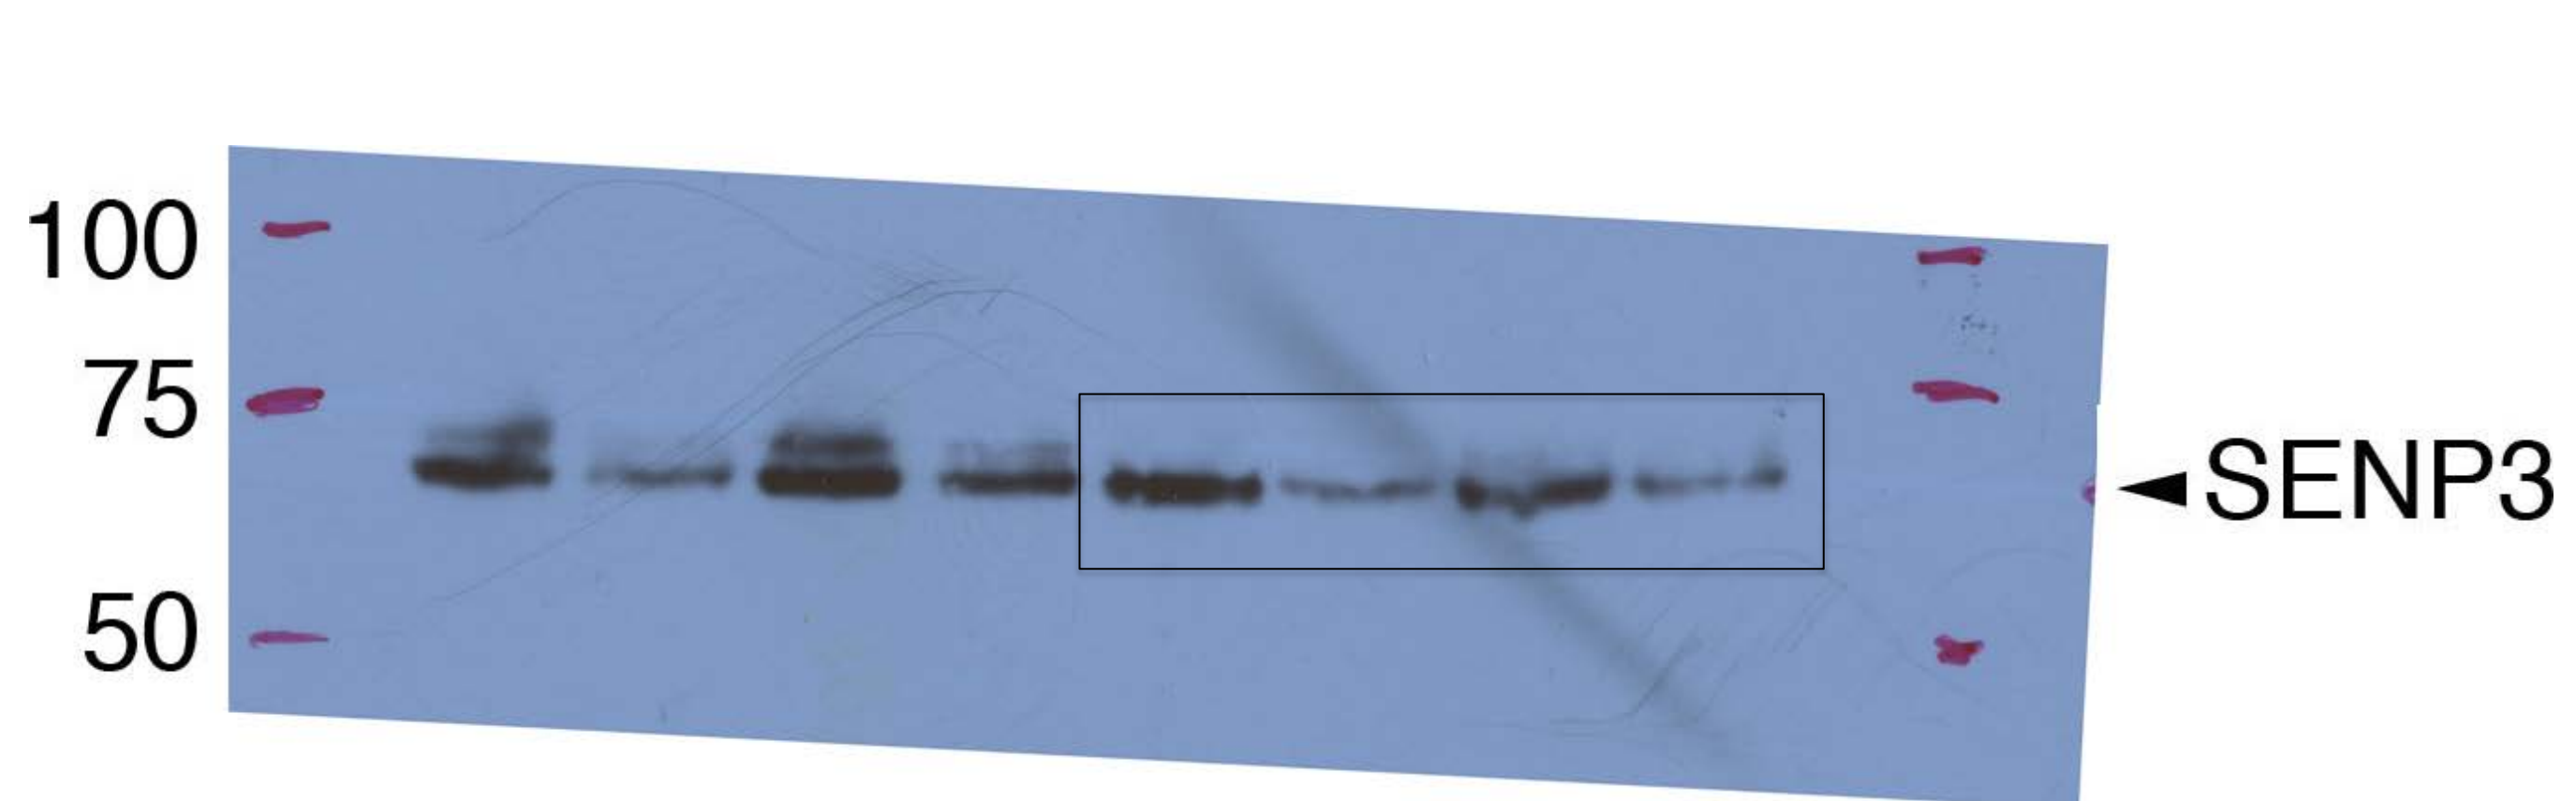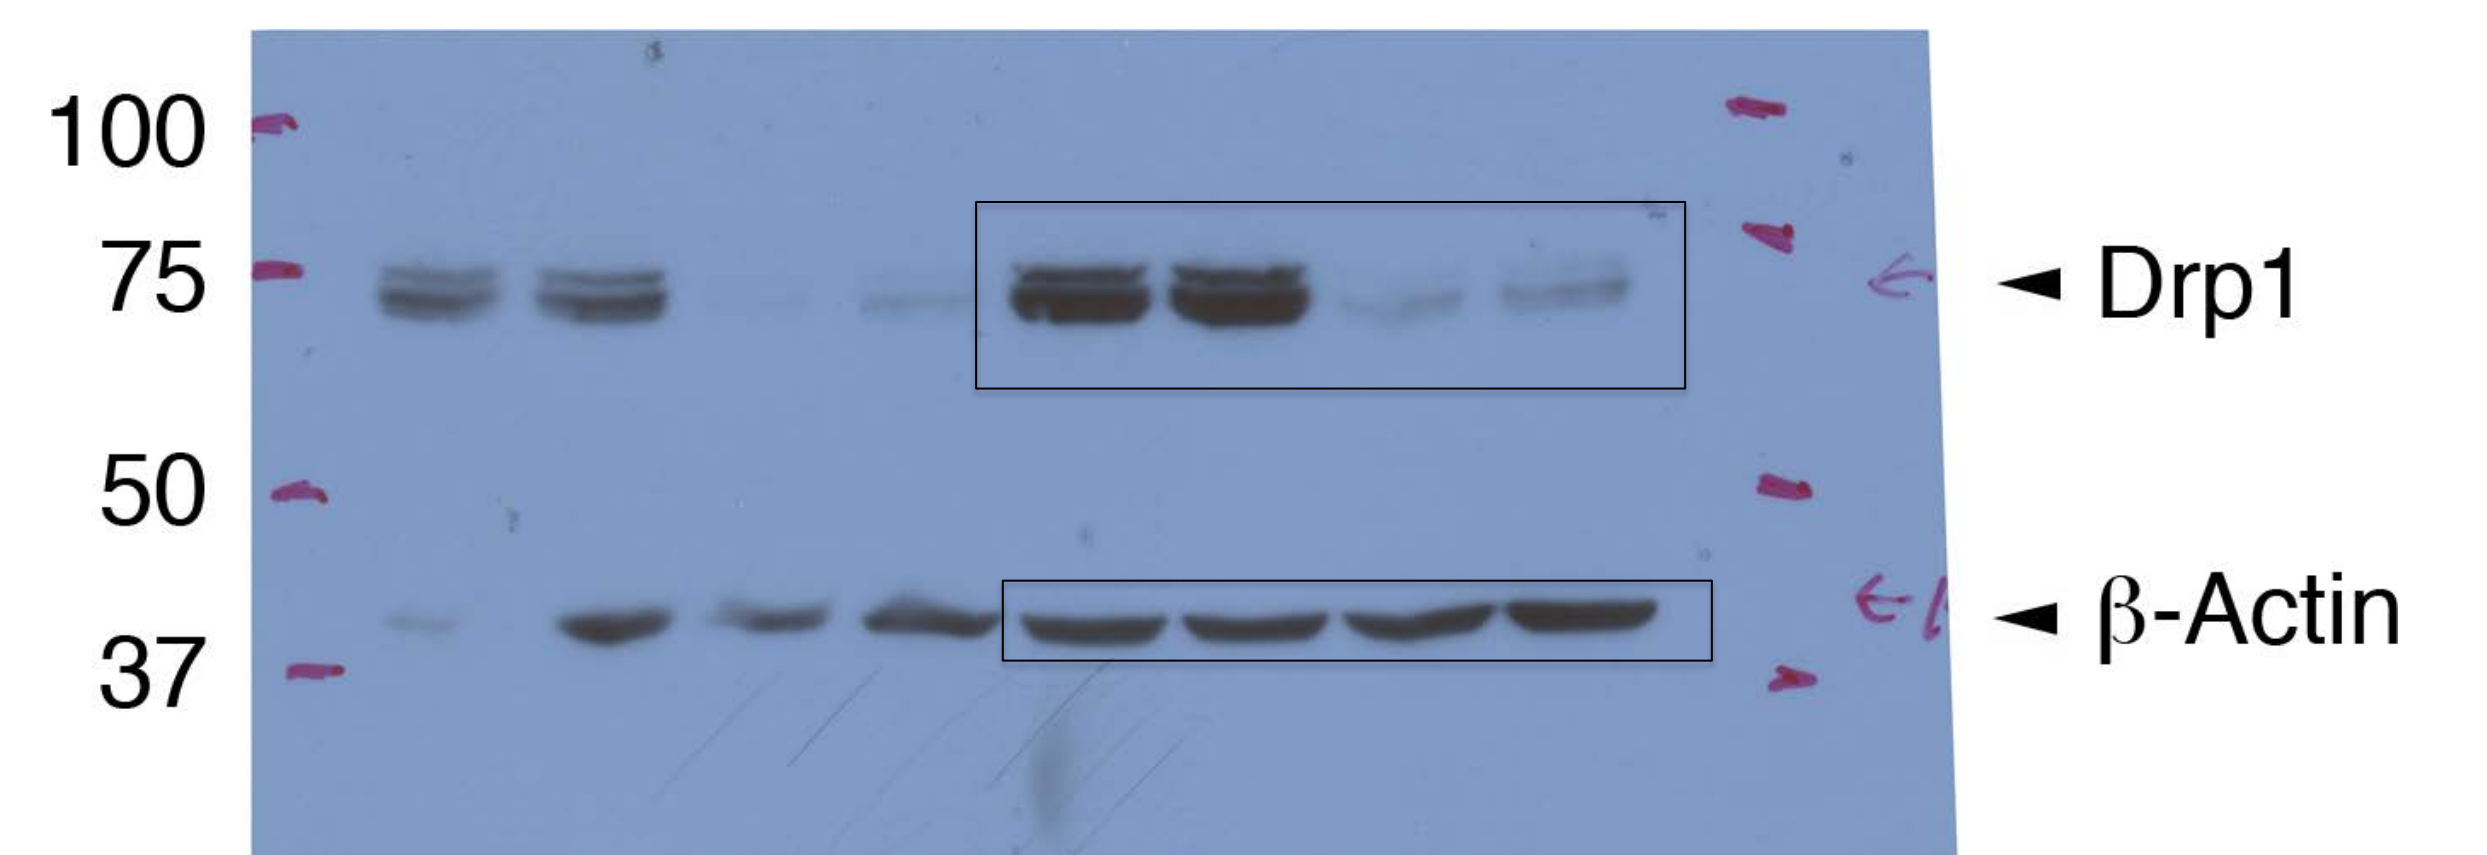

**E**

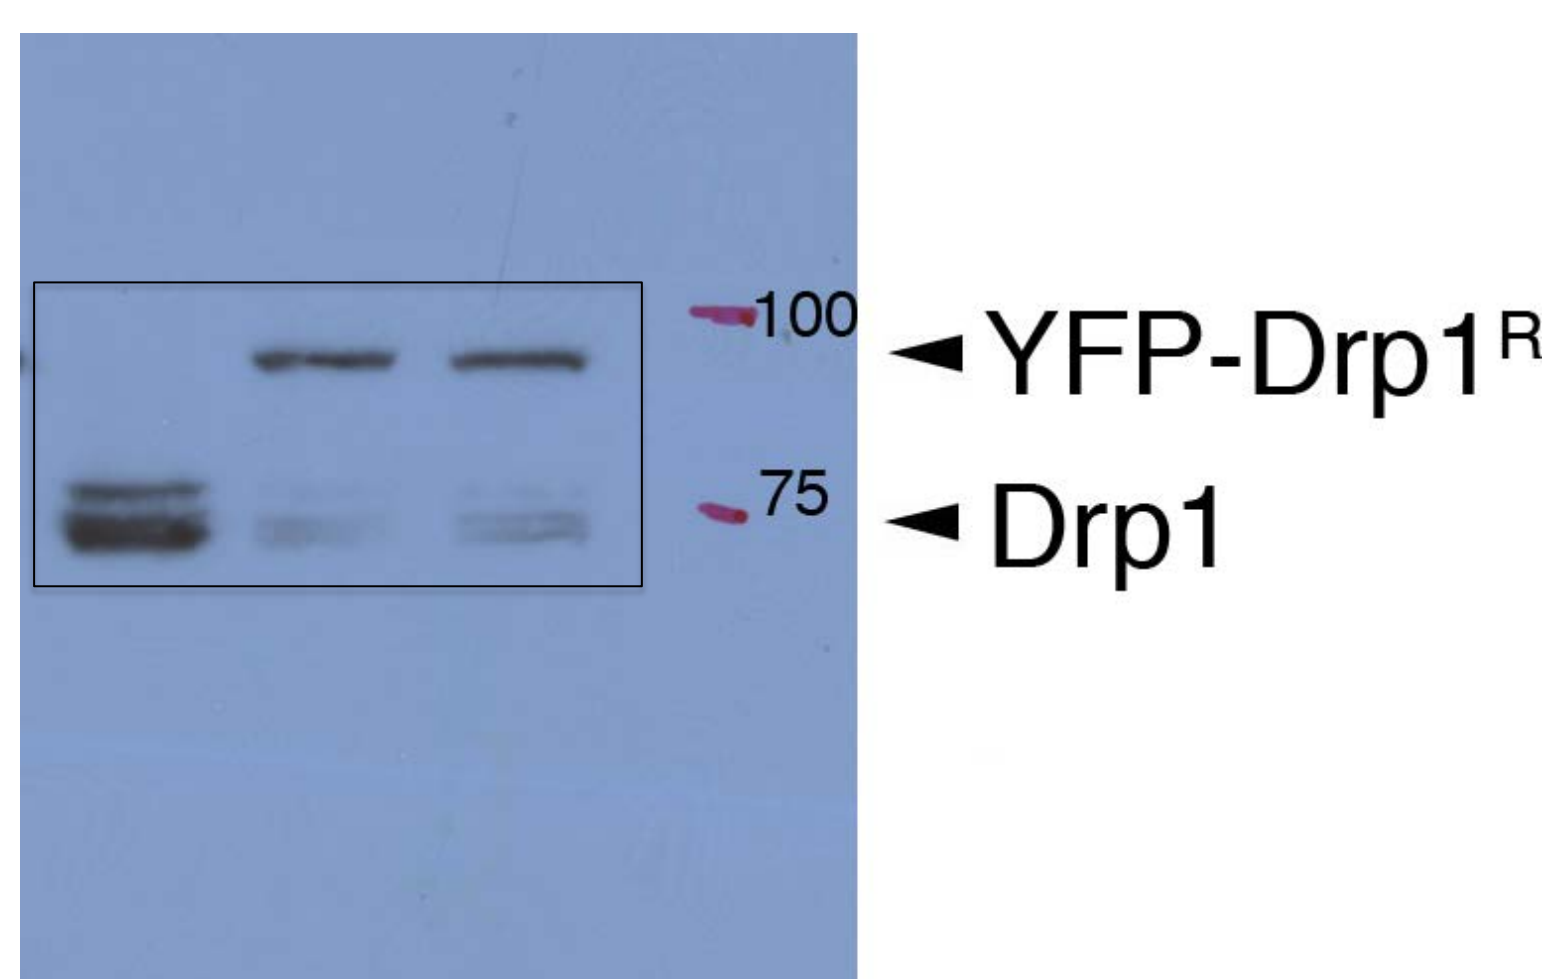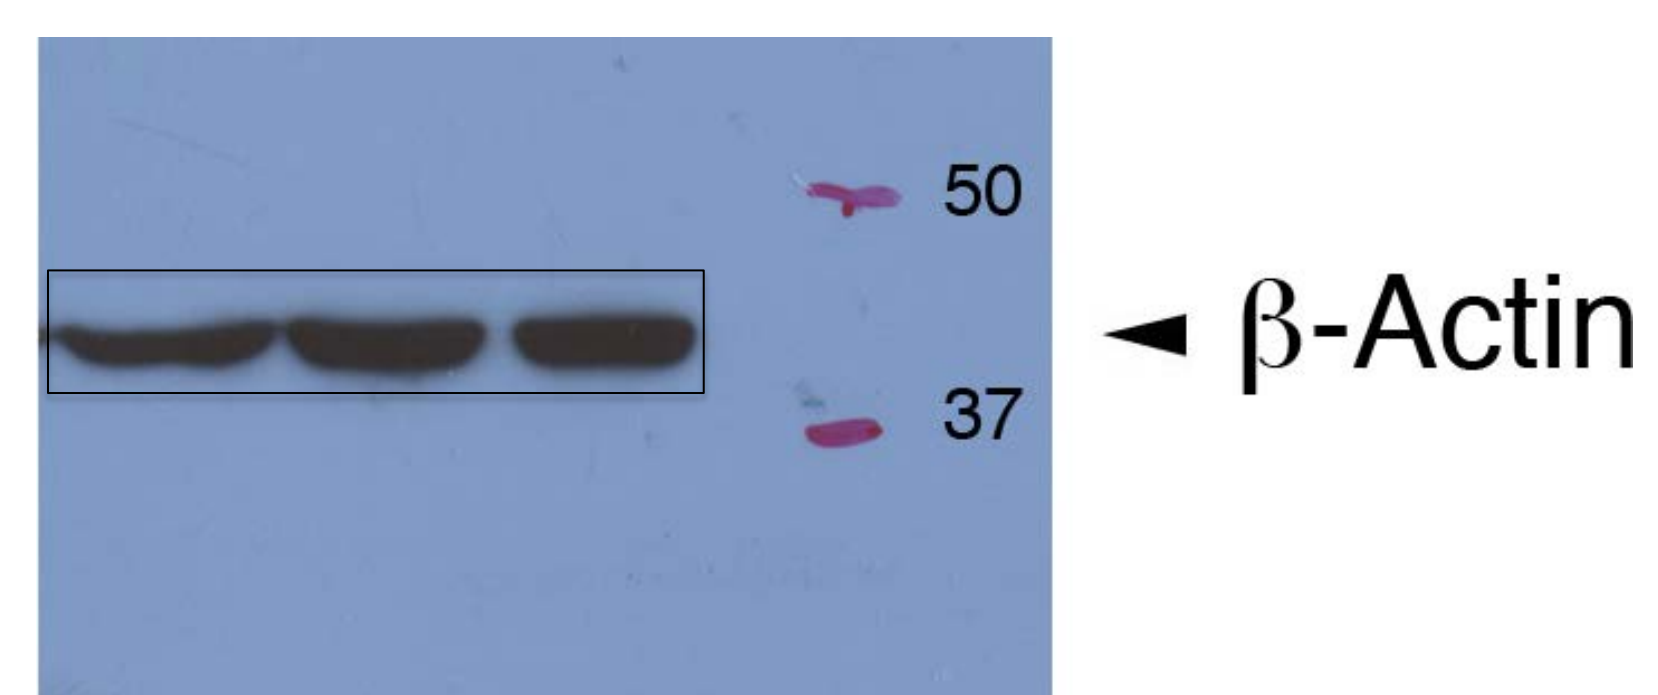

**F**

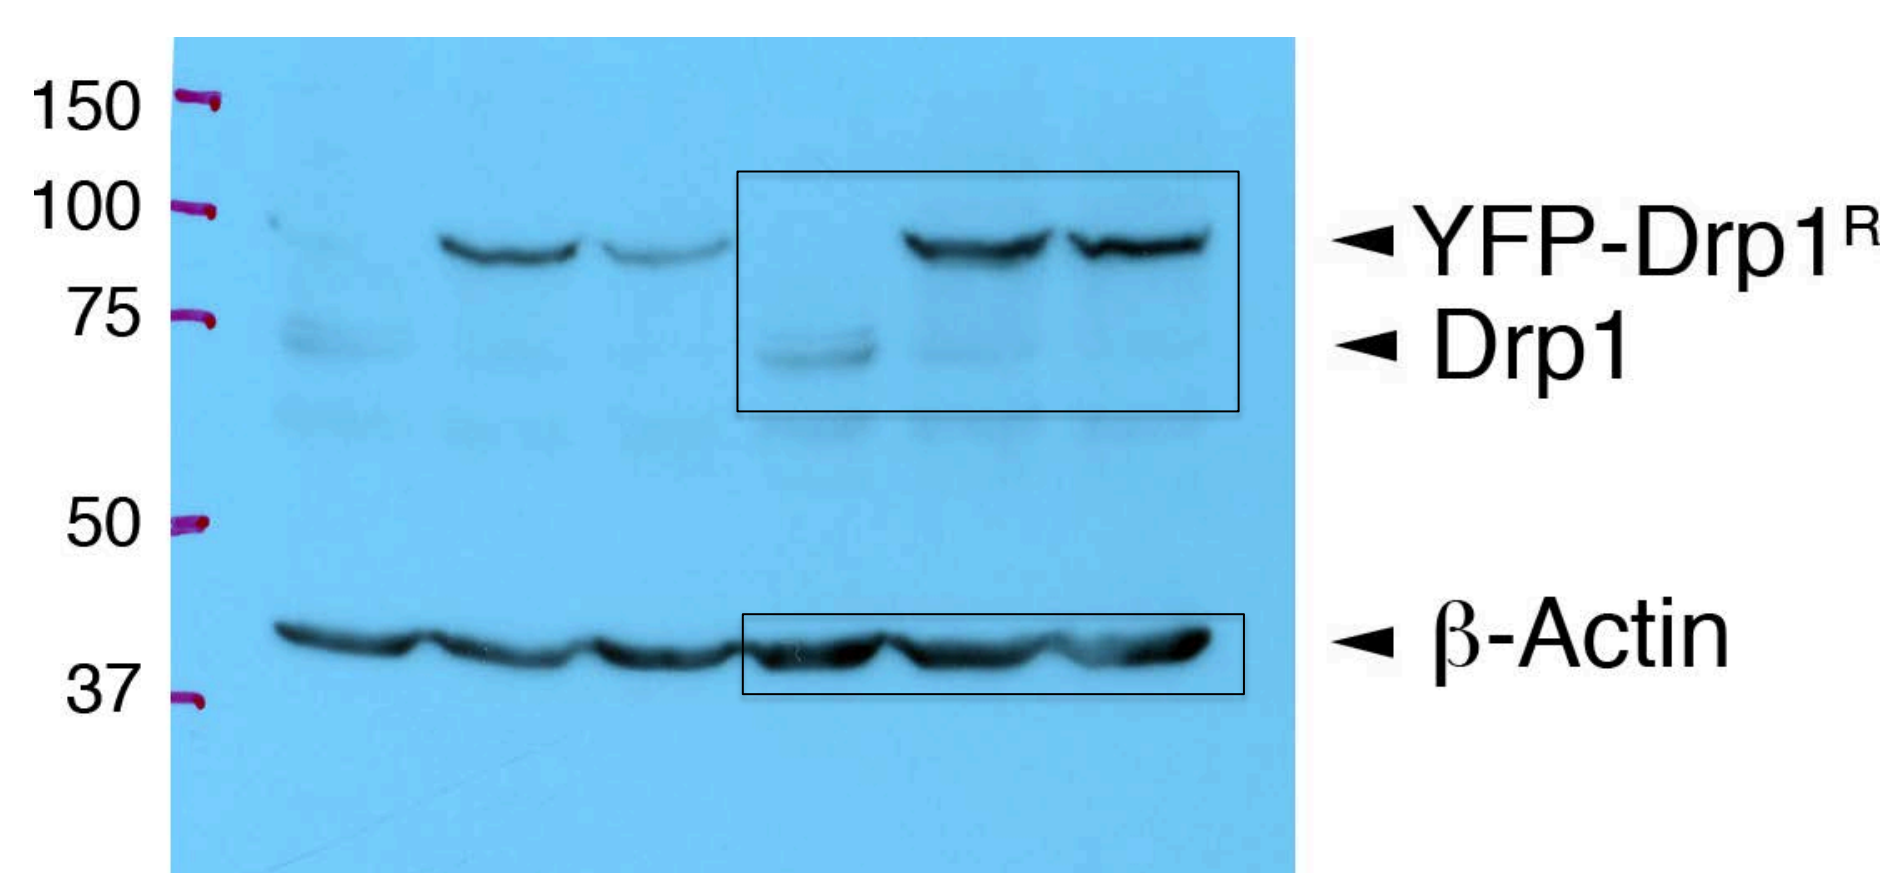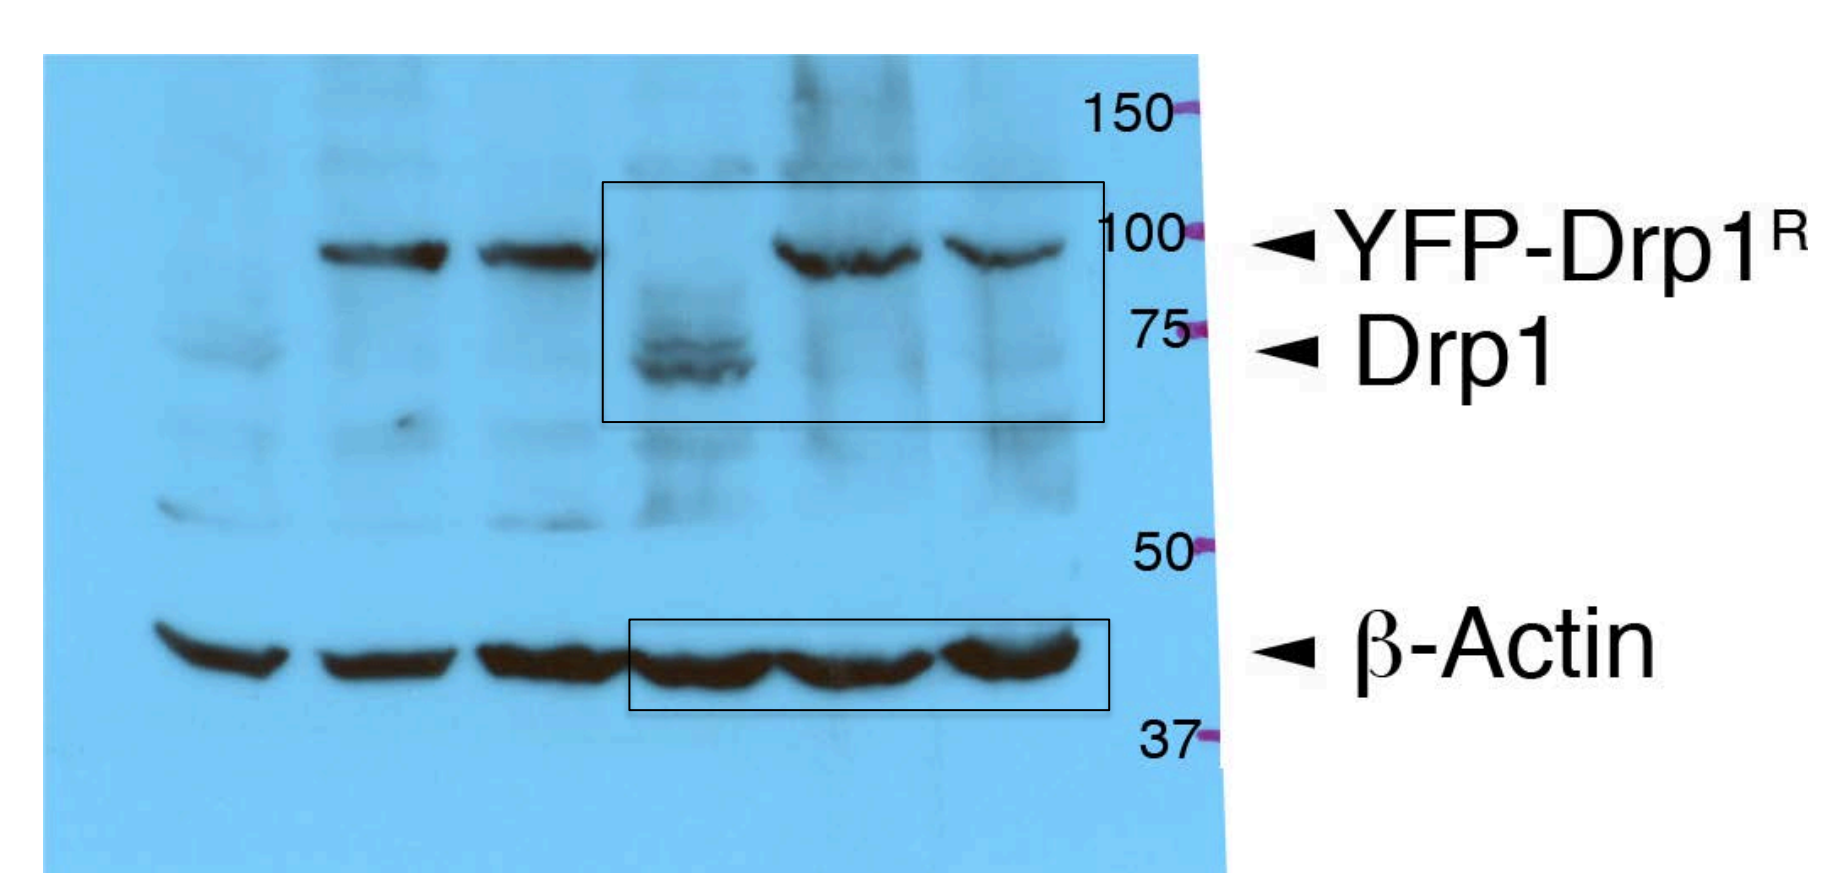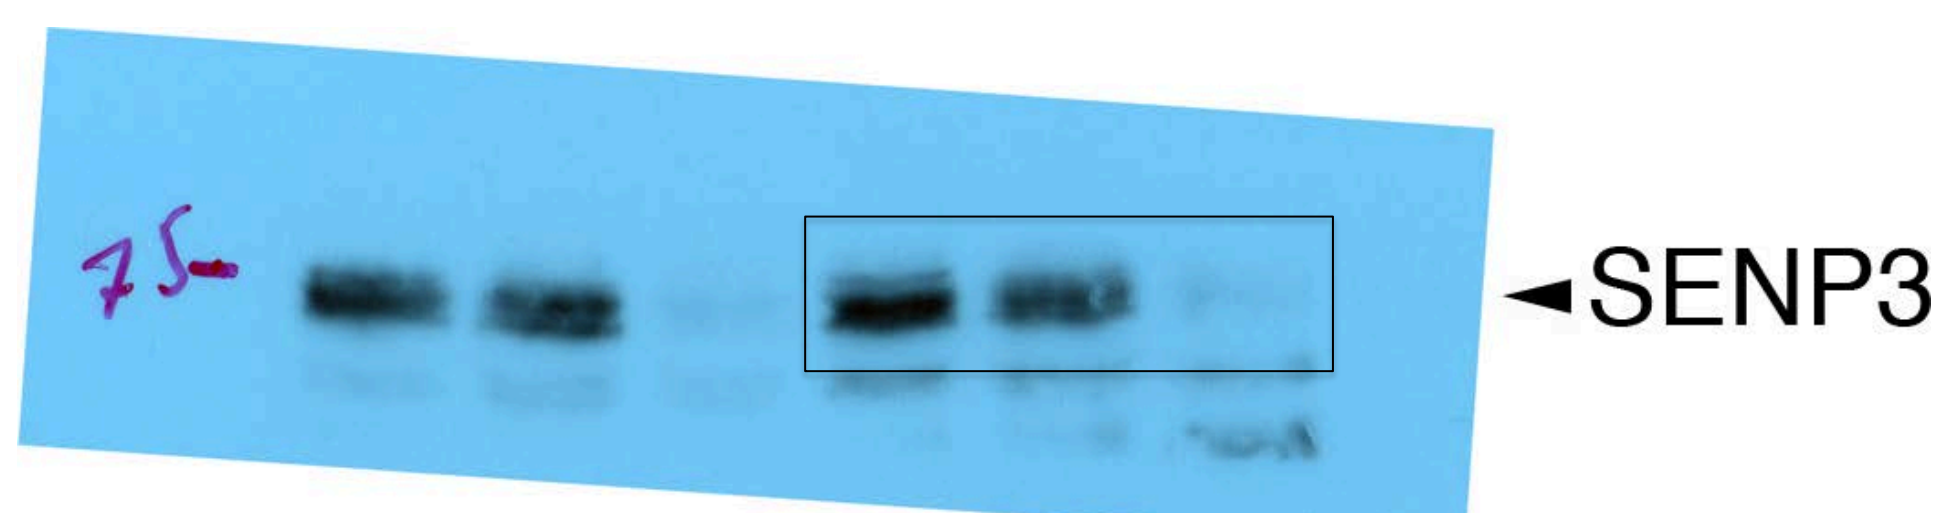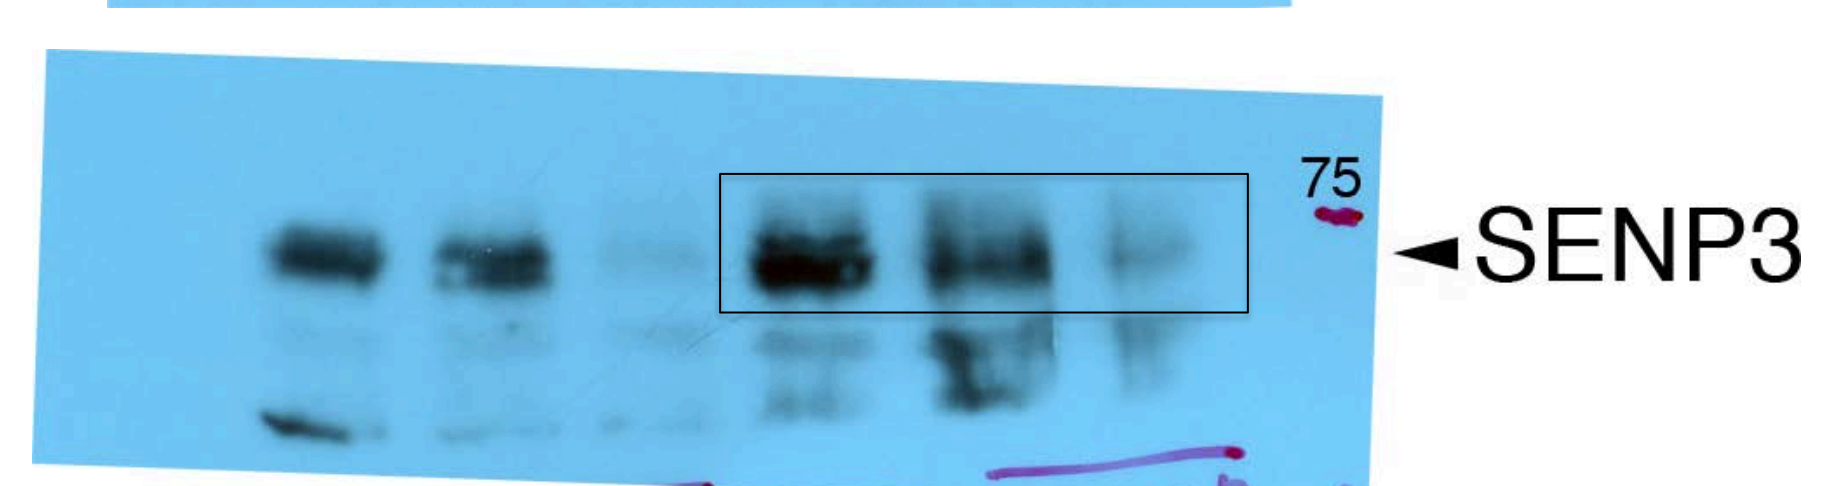

Supplement: emboj201365df6.pdf [file emboj201365df6.pdf]
